# Supplementary material for: The apolipoprotein receptor LRP3 compromises APP levels
Source: Alzheimers Res Ther. 2021 Nov 2;13:181. doi: 10.1186/s13195-021-00921-5 (PMC8565065; doi:10.1186/s13195-021-00921-5)
Supplement: Supplementary file 2 — Additional file 2. Complete microarray. [file 13195_2021_921_MOESM2_ESM.xlsx]

## Sheet:  M - C filt 
Row	Col	ControlType	ProbeName	SystematicName	gene_id	Symbol	GeneName	logFC	AveExpr	t	P.Value	adj.P.Val	B			The summary table contains the following information:
162	45	0	A_24_P330822	NM_000458	6928	HNF1B	HNF1 homeobox B	-2.43204	9.38675	-43.8893	1.58532e-11	9.30853e-07	10.2708			logFC is the log2-fold change,
23	107	0	A_33_P3247210	A_33_P3247210	NA			-1.5472	8.89828	-29.1476	5.47907e-10	1.50688e-05	9.51065			the AveExpr is the average expression value across all arrays and channels,
26	85	0	A_33_P3379922	NM_000312	5624	PROC	protein C (inactivator of coagulation factors Va and VIIIa)	-1.70573	8.30025	-28.0207	7.69903e-10	1.50688e-05	9.40911			the moderated t-statistic (t) is the logFC to its standard error,
32	69	0	A_21_P0004684	ENST00000454262	NA	XLOC_005462		-2.56853	11.0782	-26.0713	1.43317e-09	2.10379e-05	9.20825			the P.Value is the associated p-value,
200	61	0	A_33_P3418194	NM_023946	66004	LYNX1	Ly6/neurotoxin 1	1.51711	14.1043	21.8759	6.47001e-09	7.598e-05	8.63228			the adj.P.Val is the p-value adjusted for multiple testing
77	26	0	A_23_P11843	NM_201630	10446	LRRN2	leucine rich repeat neuronal 2	-1.00986	9.5764	-21.2478	8.30373e-09	8.12617e-05	8.52409			and the B-value (B) is the log-odds that a gene is differentially expressed.
238	40	0	A_23_P11843	NM_201630	10446	LRRN2	leucine rich repeat neuronal 2	-0.978099	9.6748	-19.4411	1.77472e-08	0.000130858	8.1713
137	106	0	A_23_P11843	NM_201630	10446	LRRN2	leucine rich repeat neuronal 2	-0.973706	9.77045	-19.3068	1.88284e-08	0.000130858	8.14232
139	97	0	A_23_P11843	NM_201630	10446	LRRN2	leucine rich repeat neuronal 2	-0.911954	9.74885	-19.1642	2.00577e-08	0.000130858	8.1111
214	51	0	A_32_P25357	NM_004933	1013	CDH15	cadherin 15, type 1, M-cadherin (myotubule)	0.977444	9.84441	18.7631	2.40197e-08	0.000141037	8.02072
65	31	0	A_33_P3375762	NR_040117	392364	LOC392364	chromosome 15 open reading frame 2 pseudogene	-1.28299	7.61403	-18.2838	2.99408e-08	0.000159821	7.90746
245	94	0	A_33_P3363016	NM_001242790	2972	BRF1	BRF1 homolog, subunit of RNA polymerase III transcription initiation factor IIIB (S. cerevisiae)	-0.800466	10.2777	-18.0096	3.40473e-08	0.000166596	7.83999
302	116	0	A_23_P11843	NM_201630	10446	LRRN2	leucine rich repeat neuronal 2	-1.02075	9.62178	-17.4675	4.41456e-08	0.000199392	7.70044
234	63	0	A_21_P0014791	XR_132586	NA	LOC100652804	uncharacterized LOC100652804	1.64693	12.2581	17.123	5.22751e-08	0.000219246	7.60733
270	57	0	A_33_P3313411	NM_001172630	115703	ARHGAP33	Rho GTPase activating protein 33	0.643422	15.0945	16.9532	5.68861e-08	0.000222679	7.56009
230	45	0	A_21_P0001811	TCONS_00003548	NA	XLOC_001320		1.20284	11.5062	16.7141	6.41627e-08	0.000235465	7.49204
144	143	0	A_23_P11843	NM_201630	10446	LRRN2	leucine rich repeat neuronal 2	-1.01527	9.67483	-16.3312	7.8072e-08	0.000269656	7.37915
135	71	0	A_23_P84230	NM_032109	23440	OTP	orthopedia homeobox	-0.886132	7.36387	-15.8825	9.88053e-08	0.000322308	7.24045
244	35	0	A_33_P3384710	NM_018182	55731	C17orf63	chromosome 17 open reading frame 63	1.83795	11.1654	15.708	1.08466e-07	0.0003352	7.18454
208	86	0	A_21_P0009926	TCONS_00028091	NA	XLOC_013436		0.652371	14.4283	15.2099	1.42331e-07	0.000417864	7.0186
114	41	0	A_33_P3211078	NM_003484	8091	HMGA2	high mobility group AT-hook 2	1.10449	12.2056	14.3335	2.34406e-07	0.000655409	6.70201
363	25	0	A_33_P3350638	A_33_P3350638	NA			-0.731863	8.83178	-13.9993	2.85662e-07	0.000762419	6.57229
164	47	0	A_33_P3223678	NM_014564	8022	LHX3	LIM homeobox 3	1.21182	14.0809	13.7843	3.25179e-07	0.000830153	6.48602
144	121	0	A_33_P3264444	ENST00000482292	10471	PFDN6	prefoldin subunit 6	1.59574	12.0818	13.6419	3.54657e-07	0.000867684	6.42767
88	91	0	A_33_P3309849	A_33_P3309849	NA			-0.671883	8.72808	-13.2824	4.43228e-07	0.001041	6.27573
96	160	0	A_33_P3219090	NM_005542	3638	INSIG1	insulin induced gene 1	0.718519	11.281	13.0538	5.12219e-07	0.00112206	6.17555
110	90	0	A_23_P11843	NM_201630	10446	LRRN2	leucine rich repeat neuronal 2	-0.902734	9.76914	-13.0424	5.15959e-07	0.00112206	6.17048
7	134	0	A_23_P49546	NM_000835	2905	GRIN2C	glutamate receptor, ionotropic, N-methyl D-aspartate 2C	-1.20927	9.02644	-12.6244	6.76441e-07	0.0013439	5.97956
376	152	0	A_23_P11843	NM_201630	10446	LRRN2	leucine rich repeat neuronal 2	-1.17015	9.5041	-12.5718	7.0029e-07	0.0013439	5.95483
173	73	0	A_33_P3414017	A_33_P3414017	NA			1.31995	13.591	12.4801	7.44117e-07	0.0013439	5.91133
66	59	0	A_23_P68155	NM_022168	64135	IFIH1	interferon induced with helicase C domain 1	-0.61383	6.86209	-12.4494	7.59491e-07	0.0013439	5.89663
287	163	0	A_23_P11843	NM_201630	10446	LRRN2	leucine rich repeat neuronal 2	-0.97131	9.60282	-12.4455	7.61469e-07	0.0013439	5.89476
225	112	0	A_23_P139500	NM_030762	79365	BHLHE41	basic helix-loop-helix family, member e41	-0.928749	8.65262	-12.4277	7.70548e-07	0.0013439	5.88623
108	78	0	A_24_P250227	NM_021724	9572	NR1D1	nuclear receptor subfamily 1, group D, member 1	-0.747825	9.0799	-12.4129	7.78181e-07	0.0013439	5.87913
184	17	0	A_33_P3495962	BM918074	26777	SNORA71A	small nucleolar RNA, H/ACA box 71A	1.05213	11.2866	12.307	8.35427e-07	0.00137448	5.82782
369	1	0	A_23_P11843	NM_201630	10446	LRRN2	leucine rich repeat neuronal 2	-1.02841	9.56056	-12.2941	8.4271e-07	0.00137448	5.82153
199	92	0	A_23_P214144	NM_000493	1300	COL10A1	collagen, type X, alpha 1	-0.749999	8.21807	-11.8552	1.13807e-06	0.00180606	5.60108
134	83	0	A_23_P141394	NM_017983	55062	WIPI1	WD repeat domain, phosphoinositide interacting 1	0.491083	11.8951	11.6987	1.26978e-06	0.00194844	5.51949
53	102	0	A_23_P114903	NM_002155	3310	HSPA6	heat shock 70kDa protein 6 (HSP70B')	-0.583419	6.26226	-11.6572	1.30755e-06	0.00194844	5.49754
276	21	0	A_33_P3417222	ENST00000378430	971	CD72	CD72 molecule	0.480438	14.8984	11.6302	1.33274e-06	0.00194844	5.48323
172	150	0	A_24_P356916	NM_001011554	64849	SLC13A3	solute carrier family 13 (sodium-dependent dicarboxylate transporter), member 3	-0.785087	7.12674	-11.5926	1.36871e-06	0.00194844	5.46322
215	49	0	A_33_P3419970	NM_148896	256933	NPB	neuropeptide B	0.53193	14.0758	11.5671	1.39371e-06	0.00194844	5.44959
282	33	0	A_33_P3263284	NR_024563	100130238	LOC100130238	uncharacterized LOC100130238	1.11039	11.4557	11.4644	1.49979e-06	0.00204799	5.39421
146	101	0	A_24_P270728	NM_001042483	26471	NUPR1	nuclear protein, transcriptional regulator, 1	0.928783	7.92933	11.4176	1.55112e-06	0.00206994	5.3687
138	131	0	A_33_P3413104	A_33_P3413104	NA			-0.575797	6.50841	-11.3619	1.61467e-06	0.00210686	5.33819
114	81	0	A_33_P3365963	A_33_P3365963	NA			1.03117	13.7244	11.32	1.6644e-06	0.00212453	5.31509
358	132	0	A_21_P0006208	TCONS_00016126	NA	XLOC_007511		-0.710364	6.45671	-11.0038	2.09929e-06	0.00262264	5.13665
308	39	0	A_33_P3371144	A_33_P3371144	NA			1.01242	13.243	10.9656	2.15974e-06	0.00264194	5.11463
318	85	0	A_21_P0011347	ENST00000338567	NA	XLOC_l2_004840		-0.435688	6.78199	-10.9324	2.21397e-06	0.00265301	5.09537
152	65	0	A_21_P0010114	TCONS_00028640	NA	XLOC_013687		-0.546197	6.01491	-10.8955	2.27603e-06	0.00267283	5.07385
229	140	0	A_24_P87931	NM_145343	8542	APOL1	apolipoprotein L, 1	1.27928	10.6389	10.5688	2.91729e-06	0.00335871	4.87894
10	108	0	A_23_P380318	NM_001965	1961	EGR4	early growth response 4	-0.862309	7.17227	-10.503	3.06935e-06	0.00346583	4.83866
82	34	0	A_23_P62901	NM_006763	7832	BTG2	BTG family, member 2	-0.450209	12.3216	-10.4397	3.22401e-06	0.00357178	4.79956
340	60	0	A_19_P00810465	NM_002235	NA	KCNA6	potassium voltage-gated channel, shaker-related subfamily, member 6	-0.629097	6.83822	-10.4079	3.30489e-06	0.00359357	4.77981
379	12	0	A_33_P3214943	NM_001134434	9806	SPOCK2	sparc/osteonectin, cwcv and kazal-like domains proteoglycan (testican) 2	-0.911236	11.2147	-10.3352	3.49851e-06	0.00367499	4.73432
301	58	0	A_21_P0012887	ENST00000343123	NA	XLOC_l2_011911		0.856721	10.4277	10.3328	3.50494e-06	0.00367499	4.73284
326	98	0	A_21_P0002558	TCONS_00004641	NA	XLOC_002554		-0.416704	6.73201	-10.2577	3.71864e-06	0.00383066	4.68538
353	22	0	A_23_P325642	NM_006849	64714	PDIA2	protein disulfide isomerase family A, member 2	0.732245	10.5558	10.1896	3.92496e-06	0.00397348	4.64192
244	110	0	A_21_P0014288	XR_109155	NA	ANKRD10-IT1	ANKRD10 intronic transcript 1 (non-protein coding)	-0.582117	8.13005	-10.0924	4.24132e-06	0.00417325	4.57929
123	58	0	A_33_P3410235	NM_144565	90527	DUOXA1	dual oxidase maturation factor 1	1.50855	8.2229	10.0857	4.26444e-06	0.00417325	4.57488
129	65	0	A_33_P3279009	NM_018942	3166	HMX1	H6 family homeobox 1	0.574934	14.3589	9.99746	4.57814e-06	0.0044068	4.51726
35	110	0	A_23_P365738	NM_015193	23237	ARC	activity-regulated cytoskeleton-associated protein	-0.572939	11.5124	-9.92668	4.8484e-06	0.00459167	4.47053
271	45	0	A_23_P32404	NM_002201	3669	ISG20	interferon stimulated exonuclease gene 20kDa	-0.590666	11.7431	-9.89398	4.97919e-06	0.00464069	4.44878
169	81	0	A_33_P3352687	NR_028326	100133161	LOC100133161	uncharacterized LOC100133161	0.5021	15.4539	9.8235	5.27452e-06	0.00476997	4.40161
146	83	0	A_23_P819	NM_005101	9636	ISG15	ISG15 ubiquitin-like modifier	-0.666021	10.3481	-9.82215	5.28038e-06	0.00476997	4.4007
103	19	0	A_24_P384397	NM_133452	125950	RAVER1	ribonucleoprotein, PTB-binding 1	0.973109	12.9791	9.79591	5.39536e-06	0.00479999	4.38302
240	101	0	A_21_P0004470	TCONS_00010556	NA	XLOC_005083		-0.375223	7.82799	-9.64634	6.10616e-06	0.00535128	4.28104
191	60	0	A_23_P29079	NM_002626	5211	PFKL	phosphofructokinase, liver	1.22688	12.971	9.6084	6.30247e-06	0.00544209	4.25485
384	116	0	A_33_P3424467	NM_152609	163882	CNST	consortin, connexin sorting protein	-0.887592	9.98516	-9.57811	6.46424e-06	0.00550088	4.23384
225	52	0	A_33_P3308626	NM_014940	22879	MON1B	MON1 homolog B (yeast)	1.11659	13.4298	9.45237	7.18667e-06	0.00602828	4.14571
124	79	0	A_23_P131089	NM_198471	256949	KANK3	KN motif and ankyrin repeat domains 3	-0.678984	8.46161	-9.3837	7.61851e-06	0.0063005	4.09696
16	135	0	A_23_P144959	NM_004385	1462	VCAN	versican	-0.385133	11.8053	-9.24207	8.60265e-06	0.00694312	3.99496
235	52	0	A_23_P28772	NM_001048226	55861	DBNDD2	dysbindin (dystrobrevin binding protein 1) domain containing 2	-0.387062	11.9014	-9.23702	8.64025e-06	0.00694312	3.99129
230	41	0	A_33_P3222769	NM_001013638	388199	PRR25	proline rich 25	0.764252	13.1411	9.22238	8.75029e-06	0.00694312	3.98063
185	88	0	A_23_P102172	NM_173077	130749	CPO	carboxypeptidase O	-0.449677	5.98552	-9.13563	9.43476e-06	0.00738641	3.91702
239	107	0	A_23_P379475	NM_014762	1718	DHCR24	24-dehydrocholesterol reductase	0.350082	12.3956	8.99939	1.06323e-05	0.00821445	3.8156
307	159	0	A_33_P3213288	NM_004847	199	AIF1	allograft inflammatory factor 1	-0.526922	7.01001	-8.83921	1.22596e-05	0.00934867	3.69395
175	132	0	A_21_P0004018	ENST00000512650	NA	XLOC_004435		-0.522261	6.66479	-8.76133	1.31486e-05	0.00989806	3.63384
246	77	0	A_33_P3263359	ENST00000546995	1606	DGKA	diacylglycerol kinase, alpha 80kDa	0.407005	7.70646	8.70943	1.37805e-05	0.0101585	3.59342
352	110	0	A_23_P33465	NM_024324	79174	CRELD2	cysteine-rich with EGF-like domains 2	0.370456	14.5417	8.70463	1.38407e-05	0.0101585	3.58967
306	103	0	A_33_P3312187	A_33_P3312187	NA			-0.386351	6.76058	-8.65739	1.4448e-05	0.0104733	3.55261
199	39	0	A_24_P15640	BC137009	NA			0.623248	12.3711	8.55563	1.58585e-05	0.011263	3.47196
136	95	0	A_32_P452655	NM_001040078	654346	LGALS9C	lectin, galactoside-binding, soluble, 9C	-0.529632	10.4521	-8.55136	1.59209e-05	0.011263	3.46855
76	89	0	A_33_P3369854	NM_153614	374407	DNAJB13	DnaJ (Hsp40) homolog, subfamily B, member 13	-0.542986	7.86827	-8.44039	1.76419e-05	0.0123319	3.37927
281	87	0	A_33_P3406090	A_33_P3406090	NA			0.428062	8.13858	8.37395	1.87699e-05	0.0128303	3.32516
213	26	0	A_33_P3384885	ENST00000359035	118472	ZNF511	zinc finger protein 511	0.500147	8.58248	8.37269	1.87919e-05	0.0128303	3.32413
12	161	0	A_23_P152125	NM_002461	4597	MVD	mevalonate (diphospho) decarboxylase	0.516983	9.99896	8.27284	2.0642e-05	0.0138616	3.24187
268	155	0	A_23_P134433	NM_001427	2020	EN2	engrailed homeobox 2	0.674518	15.0628	8.26607	2.07746e-05	0.0138616	3.23625
4	86	0	A_23_P50646	NM_001193621	390940	LOC390940	uncharacterized protein ENSP00000244321	-0.559694	7.53425	-8.20639	2.19842e-05	0.0145039	3.1865
39	88	0	A_23_P63896	NM_000043	355	FAS	Fas (TNF receptor superfamily, member 6)	-0.41474	8.04311	-8.18284	2.24827e-05	0.0146679	3.16675
340	143	0	A_24_P243396	NM_001008657	6949	TCOF1	Treacher Collins-Franceschetti syndrome 1	-0.413796	10.2739	-8.15574	2.30718e-05	0.0148869	3.14395
245	4	0	A_23_P4161	ENST00000448504	22901	ARSG	arylsulfatase G	0.370632	6.2813	8.13826	2.34607e-05	0.0149256	3.1292
103	89	0	A_23_P25121	NM_016594	51303	FKBP11	FK506 binding protein 11, 19 kDa	0.397893	12.4159	8.1303	2.36403e-05	0.0149256	3.12247
338	101	0	A_23_P161998	NM_000613	3263	HPX	hemopexin	-0.376005	6.97585	-8.06991	2.50526e-05	0.0155709	3.07117
60	41	0	A_33_P3283611	NM_001549	3437	IFIT3	interferon-induced protein with tetratricopeptide repeats 3	-1.07554	6.73925	-8.06413	2.51926e-05	0.0155709	3.06624
215	88	0	A_33_P3668839	NR_036539	644656	LOC644656	uncharacterized LOC644656	0.461529	10.1348	8.03657	2.58722e-05	0.0158243	3.04266
329	163	0	A_23_P139786	NM_003733	8638	OASL	2'-5'-oligoadenylate synthetase-like	-0.909858	6.87806	-8.0143	2.64357e-05	0.0160023	3.02355
45	136	0	A_23_P165707	NM_174898	129530	LYG1	lysozyme G-like 1	-0.477885	8.43568	-7.9937	2.69693e-05	0.0161587	3.00582
185	58	0	A_23_P102172	NM_173077	130749	CPO	carboxypeptidase O	-0.524604	6.09717	-7.93933	2.84352e-05	0.0168649	2.95878
329	61	0	A_23_P78108	NM_005165	230	ALDOC	aldolase C, fructose-bisphosphate	0.417761	11.2914	7.9229	2.88953e-05	0.0169665	2.9445
106	115	0	A_23_P131825	NM_003279	7125	TNNC2	troponin C type 2 (fast)	-0.537773	7.70992	-7.89881	2.95849e-05	0.0171994	2.92349
199	104	0	A_21_P0007215	THC2653254	NA	XLOC_009146		-0.48268	8.13669	-7.88477	2.99951e-05	0.0172669	2.91122
163	121	0	A_33_P3293169	NM_017749	55626	AMBRA1	autophagy/beclin-1 regulator 1	-0.495005	6.39008	-7.85651	3.08399e-05	0.0175808	2.88644
73	45	0	A_33_P3277883	NR_033828	100129931	LOC100129931	uncharacterized LOC100129931	-1.77397	9.62979	-7.82782	3.17243e-05	0.017811	2.86119
227	14	0	A_23_P131534	NM_007227	11250	GPR45	G protein-coupled receptor 45	-0.354246	6.2875	-7.81218	3.22182e-05	0.017811	2.84738
171	36	0	A_19_P00316479	AK123416	NA	LOC553137	uncharacterized LOC553137	-1.02052	6.82866	-7.81097	3.22568e-05	0.017811	2.84631
4	16	0	A_24_P117029	NM_000527	3949	LDLR	low density lipoprotein receptor	0.433875	12.5124	7.80471	3.24571e-05	0.017811	2.84077
220	17	0	A_33_P3387561	NM_206818	126014	OSCAR	osteoclast associated, immunoglobulin-like receptor	0.663384	11.9549	7.73101	3.4921e-05	0.0189857	2.77524
296	48	0	A_23_P52266	NM_001548	3434	IFIT1	interferon-induced protein with tetratricopeptide repeats 1	-1.09942	10.4391	-7.70503	3.58381e-05	0.0191661	2.75197
225	21	0	A_19_P00319633	NR_037178	NA	LOC100294145	uncharacterized LOC100294145	0.459631	9.45621	7.69686	3.61319e-05	0.0191661	2.74464
236	51	0	A_23_P29185	NM_001145418	23331	TTC28	tetratricopeptide repeat domain 28	-0.324989	11.1168	-7.68735	3.64772e-05	0.0191661	2.7361
187	66	0	A_23_P105592	NM_000431	4598	MVK	mevalonate kinase	0.325018	14.6835	7.68513	3.65585e-05	0.0191661	2.7341
340	46	0	A_33_P3220911	ENST00000252593	684	BST2	bone marrow stromal cell antigen 2	-0.690325	9.26683	-7.66287	3.73832e-05	0.0192882	2.71405
22	87	0	A_23_P108734	NM_018436	55821	ALLC	allantoicase	-0.380348	7.69808	-7.65517	3.76733e-05	0.0192882	2.70709
189	57	0	A_23_P102172	NM_173077	130749	CPO	carboxypeptidase O	-0.438855	6.0228	-7.64395	3.81001e-05	0.0192882	2.69696
364	110	0	A_24_P274270	NM_139266	6772	STAT1	signal transducer and activator of transcription 1, 91kDa	-0.57184	9.10389	-7.64382	3.81054e-05	0.0192882	2.69683
225	61	0	A_32_P70927	NM_207339	203569	PAGE2	P antigen family, member 2 (prostate associated)	-0.527139	7.67224	-7.62744	3.87382e-05	0.019441	2.68201
137	101	0	A_33_P3423941	NM_003641	8519	IFITM1	interferon induced transmembrane protein 1 (9-27)	-1.32276	7.66766	-7.57677	4.07715e-05	0.020288	2.6359
254	148	0	A_23_P102172	NM_173077	130749	CPO	carboxypeptidase O	-0.341085	5.80164	-7.55642	4.16207e-05	0.0205365	2.61729
31	115	0	A_33_P3230011	NM_001130159	219736	STOX1	storkhead box 1	0.289551	7.44893	7.4593	4.59505e-05	0.022484	2.52777
214	83	0	A_33_P3362636	NM_001136498	284106	CISD3	CDGSH iron sulfur domain 3	0.742659	14.8035	7.44018	4.68602e-05	0.0225732	2.51001
245	80	0	A_33_P3390107	NR_003286	100008588	RN18S1	RNA, 18S ribosomal 1	1.4413	16.2389	7.43932	4.69018e-05	0.0225732	2.5092
96	53	0	A_33_P3522511	AB007954	57235	KIAA0485	uncharacterized LOC57235	-0.398511	6.4439	-7.42586	4.75544e-05	0.0227012	2.49667
137	13	0	A_21_P0013270	NR_029401	NA	LOC731275	uncharacterized LOC731275	-0.450833	11.3143	-7.3875	4.94702e-05	0.0234253	2.46081
272	145	0	A_23_P63896	NM_000043	355	FAS	Fas (TNF receptor superfamily, member 6)	-0.421937	7.78962	-7.37689	5.0015e-05	0.0234938	2.45085
91	83	0	A_23_P46936	NM_000399	1959	EGR2	early growth response 2	-0.532914	7.67931	-7.33996	5.19632e-05	0.0242153	2.4161
80	66	0	A_21_P0011321	TCONS_l2_00008611	NA	XLOC_l2_004640		-0.383964	6.23062	-7.30873	5.36758e-05	0.0248164	2.38657
328	146	0	A_21_P0006504	THC2642571	NA	XLOC_008005		-0.380069	6.15461	-7.27038	5.58639e-05	0.0256262	2.35014
357	7	0	A_24_P57898	NM_080606	128408	BHLHE23	basic helix-loop-helix family, member e23	0.910391	13.2174	7.22576	5.85339e-05	0.0266429	2.30751
100	134	0	A_23_P108734	NM_018436	55821	ALLC	allantoicase	-0.392848	7.61469	-7.21349	5.92928e-05	0.0267807	2.29573
41	75	0	A_32_P145010	CR594811	NA			0.305534	12.0062	7.19499	6.0457e-05	0.0268311	2.27795
324	44	0	A_23_P316850	NM_182577	284451	ODF3L2	outer dense fiber of sperm tails 3-like 2	0.545417	10.8467	7.19461	6.04816e-05	0.0268311	2.27757
275	74	0	A_23_P24444	NM_001360	1717	DHCR7	7-dehydrocholesterol reductase	0.290442	14.2954	7.19	6.07752e-05	0.0268311	2.27314
70	42	0	A_23_P69586	NM_005245	2195	FAT1	FAT tumor suppressor homolog 1 (Drosophila)	-0.39735	11.1744	-7.09229	6.73952e-05	0.0295317	2.17837
52	61	0	A_32_P185637	NM_020882	57642	COL20A1	collagen, type XX, alpha 1	-0.381248	6.69274	-7.08317	6.80517e-05	0.0295984	2.16947
78	84	0	A_33_P3372910	NM_014314	23586	DDX58	DEAD (Asp-Glu-Ala-Asp) box polypeptide 58	-0.343951	8.87744	-7.06164	6.96316e-05	0.0300629	2.14838
167	2	0	A_33_P3219745	ENST00000368681	3608	ILF2	interleukin enhancer binding factor 2, 45kDa	0.377848	6.39085	7.04049	7.12223e-05	0.0303081	2.12761
67	85	0	A_33_P3393582	AK124193	23582	CCNDBP1	cyclin D-type binding-protein 1	0.390911	7.44561	7.04036	7.12318e-05	0.0303081	2.12749
313	68	0	A_23_P45871	NM_006820	10964	IFI44L	interferon-induced protein 44-like	-0.988927	7.7003	-6.993	7.49406e-05	0.0315176	2.08076
220	26	0	A_23_P72737	NM_003641	8519	IFITM1	interferon induced transmembrane protein 1 (9-27)	-1.47477	8.22914	-6.99043	7.5148e-05	0.0315176	2.07821
209	52	0	A_23_P206371	NM_003946	8996	NOL3	nucleolar protein 3 (apoptosis repressor with CARD domain)	0.262352	13.6827	6.96862	7.69324e-05	0.0320372	2.05658
131	104	0	A_21_P0009844	XR_109613	NA	LOC100130157	uncharacterized LOC100130157	-0.501131	6.72435	-6.94357	7.90392e-05	0.0326827	2.03166
56	54	0	A_23_P65518	NM_016651	51339	DACT1	dapper, antagonist of beta-catenin, homolog 1 (Xenopus laevis)	-0.420455	7.0295	-6.93217	8.00189e-05	0.0328564	2.02029
177	65	0	A_23_P103756	NM_002557	5016	OVGP1	oviductal glycoprotein 1, 120kDa	-0.749092	8.64519	-6.91713	8.13324e-05	0.0331639	2.00525
314	41	0	A_33_P3335590	NM_001103175	146439	CCDC64B	coiled-coil domain containing 64B	0.25236	7.24372	6.89533	8.32778e-05	0.0337229	1.98341
294	88	0	A_23_P99163	NM_018370	55332	DRAM1	DNA-damage regulated autophagy modulator 1	-0.250157	9.79343	-6.86353	8.62072e-05	0.0346701	1.95143
228	86	0	A_33_P3368506	NM_001080442	146167	SLC38A8	solute carrier family 38, member 8	-0.439345	6.17826	-6.85302	8.71999e-05	0.0347215	1.94083
113	62	0	A_33_P3400578	NM_002126	3131	HLF	hepatic leukemia factor	-0.405089	8.44662	-6.84969	8.75177e-05	0.0347215	1.93746
382	86	0	A_23_P219060	NM_022107	63940	GPSM3	G-protein signaling modulator 3	-0.467969	9.14493	-6.8408	8.83701e-05	0.0348243	1.92849
204	151	0	A_33_P3407601	THC2753069	NA			1.49623	13.9739	6.82016	9.03867e-05	0.034867	1.90758
382	109	0	A_23_P63896	NM_000043	355	FAS	Fas (TNF receptor superfamily, member 6)	-0.330961	7.96927	-6.81324	9.10736e-05	0.034867	1.90057
61	99	0	A_21_P0009119	BC035173	NA	XLOC_011837		0.472521	8.98011	6.81257	9.114e-05	0.034867	1.89989
190	103	0	A_23_P65442	NM_006084	10379	IRF9	interferon regulatory factor 9	-0.739162	10.7886	-6.81105	9.12924e-05	0.034867	1.89834
195	35	0	A_23_P71319	NM_004462	2222	FDFT1	farnesyl-diphosphate farnesyltransferase 1	0.30534	13.3885	6.80749	9.16485e-05	0.034867	1.89473
203	55	0	A_23_P46396	NM_021190	58155	PTBP2	polypyrimidine tract binding protein 2	-0.268513	11.5878	-6.80359	9.20413e-05	0.034867	1.89077
52	140	0	A_23_P333038	NM_025145	80217	WDR96	WD repeat domain 96	-0.39861	6.73902	-6.78533	9.3904e-05	0.0353446	1.87218
242	108	0	A_24_P274270	NM_139266	6772	STAT1	signal transducer and activator of transcription 1, 91kDa	-0.494291	9.29479	-6.77773	9.46914e-05	0.035414	1.86443
266	91	0	A_33_P3218797	ENST00000370177	79144	PPDPF	pancreatic progenitor cell differentiation and proliferation factor homolog (zebrafish)	0.531905	14.3122	6.76878	9.56271e-05	0.0355376	1.8553
130	105	0	A_33_P3379341	NM_001144931	391322	LOC391322	D-dopachrome tautomerase-like	0.386803	7.26204	6.7245	0.000100412	0.037081	1.80994
289	118	0	A_23_P63896	NM_000043	355	FAS	Fas (TNF receptor superfamily, member 6)	-0.419325	7.90937	-6.67548	0.000106017	0.0389063	1.7594
36	110	0	A_33_P3361422	NM_000784	1593	CYP27A1	cytochrome P450, family 27, subfamily A, polypeptide 1	-0.46278	8.32732	-6.64474	0.000109706	0.0399064	1.72754
371	137	0	A_33_P3237201	NM_001135805	6857	SYT1	synaptotagmin I	0.345955	6.95286	6.64151	0.000110102	0.0399064	1.72418
90	153	0	A_33_P3237542	NM_021046	57830	KRTAP5-8	keratin associated protein 5-8	-0.312832	6.36473	-6.6242	0.000112248	0.0403608	1.70617
237	122	0	A_33_P3795644	AJ011409	54748	C21orf104	chromosome 21 open reading frame 104	-0.416266	6.25091	-6.62037	0.00011273	0.0403608	1.70218
230	53	0	A_24_P346517	NM_144648	136332	LRGUK	leucine-rich repeats and guanylate kinase domain containing	-0.319595	7.06613	-6.60552	0.000114618	0.040788	1.68668
211	83	0	A_21_P0013922	XM_002342076	NA	LOC100287437	uncharacterized LOC100287437	0.294215	7.21248	6.59127	0.000116461	0.0411944	1.67179
298	65	0	A_24_P378019	NM_004031	3665	IRF7	interferon regulatory factor 7	-0.381959	13.8293	-6.58471	0.000117322	0.0412501	1.66491
250	59	0	A_23_P115842	NM_018237	55749	CCAR1	cell division cycle and apoptosis regulator 1	-0.252591	12.1429	-6.57446	0.000118678	0.0414787	1.65418
230	131	0	A_23_P147729	NM_018656	55508	SLC35E3	solute carrier family 35, member E3	0.320924	11.0124	6.55535	0.000121255	0.0421287	1.6341
3	29	0	A_33_P3272189	NM_032718	84804	MFSD9	major facilitator superfamily domain containing 9	0.362952	10.037	6.54882	0.00012215	0.0421577	1.62722
134	17	0	A_33_P3233005	NM_017643	54799	MBTD1	mbt domain containing 1	0.665535	10.6207	6.54083	0.000123254	0.0421577	1.61881
365	161	0	A_23_P115842	NM_018237	55749	CCAR1	cell division cycle and apoptosis regulator 1	-0.360759	11.4989	-6.53912	0.000123493	0.0421577	1.617
115	132	0	A_23_P212126	NM_080538	8292	COLQ	collagen-like tail subunit (single strand of homotrimer) of asymmetric acetylcholinesterase	-0.405157	6.97969	-6.5147	0.000126943	0.0428071	1.59122
116	136	0	A_24_P323084	NR_038080	284185	LINC00482	long intergenic non-protein coding RNA 482	0.369242	9.31831	6.5138	0.000127072	0.0428071	1.59027
205	150	0	A_24_P274270	NM_139266	6772	STAT1	signal transducer and activator of transcription 1, 91kDa	-0.577961	8.9333	-6.51026	0.000127582	0.0428071	1.58652
270	100	0	A_21_P0000338	NR_002984	NA	SNORA56	small nucleolar RNA, H/ACA box 56	0.566787	7.35866	6.49735	0.000129458	0.0431898	1.57285
34	148	0	A_23_P63896	NM_000043	355	FAS	Fas (TNF receptor superfamily, member 6)	-0.458303	7.90714	-6.48245	0.000131663	0.043677	1.55704
167	116	0	A_32_P206899	NM_020877	146754	DNAH2	dynein, axonemal, heavy chain 2	-0.354033	7.10419	-6.4715	0.000133309	0.0439746	1.54539
223	162	0	A_33_P3287068	BC027486	728437	LOC728437	hCG2020170	-0.37657	6.25381	-6.45262	0.0001362	0.0446775	1.52527
286	160	0	A_23_P144348	NM_004787	9353	SLIT2	slit homolog 2 (Drosophila)	-0.385499	8.8809	-6.44677	0.000137109	0.0447257	1.51904
40	62	0	A_23_P24275	NR_027709	55853	IDI2-AS1	IDI2 antisense RNA 1 (non-protein coding)	-0.3907	6.98608	-6.43465	0.000139015	0.0448707	1.50609
1	83	0	A_23_P63896	NM_000043	355	FAS	Fas (TNF receptor superfamily, member 6)	-0.374814	8.11097	-6.43423	0.000139082	0.0448707	1.50563
264	86	0	A_23_P38154	NM_004110	2232	FDXR	ferredoxin reductase	-0.471715	15.3188	-6.41832	0.00014163	0.045443	1.48859
313	27	0	A_33_P3375636	NM_001129891	100131897	FAM196B	family with sequence similarity 196, member B	0.26498	5.68409	6.4016	0.000144361	0.0460676	1.47066
354	123	0	A_23_P23074	NM_006417	10561	IFI44	interferon-induced protein 44	-0.366245	10.2117	-6.39048	0.00014621	0.0460803	1.4587
79	75	0	A_33_P3244784	ENST00000427572	NA			-0.333694	6.2845	-6.38322	0.000147431	0.0460803	1.45089
215	46	0	A_21_P0009166	ENST00000447729	NA	XLOC_012176		0.533616	9.42401	6.38282	0.000147499	0.0460803	1.45046
93	101	0	A_33_P3244643	NM_001101376	440585	FAM183A	family with sequence similarity 183, member A	-0.308705	8.26018	-6.37979	0.000148012	0.0460803	1.44719
188	65	0	A_33_P3403075	NM_018304	55771	PRR11	proline rich 11	0.331581	11.6665	6.37795	0.000148325	0.0460803	1.44521
275	143	0	A_23_P108376	NM_022065	63892	THADA	thyroid adenoma associated	-0.240988	10.2474	-6.35549	0.0001522	0.046916	1.42096
121	57	0	A_23_P40108	NM_001853	1299	COL9A3	collagen, type IX, alpha 3	0.249011	11.408	6.35138	0.000152921	0.046916	1.41651
108	9	0	A_33_P3347622	NM_001244767	92597	MOB1B	MOB kinase activator 1B	0.480095	11.4923	6.34859	0.000153412	0.046916	1.4135
172	63	0	A_23_P16415	NM_002333	4037	LRP3	low density lipoprotein receptor-related protein 3	0.484057	14.4658	6.34218	0.000154548	0.0470187	1.40655
214	5	0	A_21_P0001059	ENST00000423842	NA	XLOC_000554		-0.401931	6.17594	-6.33444	0.000155931	0.0471947	1.39817
199	11	0	A_33_P3259542	NM_019069	54554	WDR5B	WD repeat domain 5B	0.270386	6.9534	6.32684	0.000157303	0.0472035	1.38992
236	11	0	A_23_P164927	NM_012451	23546	SYNGR4	synaptogyrin 4	0.426157	10.3975	6.32538	0.000157567	0.0472035	1.38834
280	37	0	A_32_P159400	NM_015902	51366	UBR5	ubiquitin protein ligase E3 component n-recognin 5	-0.46128	9.2251	-6.31765	0.00015898	0.0473555	1.37994
192	56	0	A_23_P102000	NM_001008540	7852	CXCR4	chemokine (C-X-C motif) receptor 4	0.278515	13.321	6.3114	0.000160132	0.0473555	1.37314
227	12	0	A_33_P3337742	A_33_P3337742	NA			0.438519	11.1445	6.3069	0.000160965	0.0473555	1.36825
242	102	0	A_33_P3357000	ENST00000382066	338872	C1QTNF9	C1q and tumor necrosis factor related protein 9	0.241429	5.57093	6.3051	0.000161301	0.0473555	1.36629
144	158	0	A_23_P67151	NM_058164	93145	OLFM2	olfactomedin 2	-0.285944	9.24928	-6.294	0.000163384	0.0477284	1.3542
264	149	0	A_33_P3558740	AK057616	254100	LOC254100	uncharacterized LOC254100	0.311248	7.07611	6.25697	0.000170551	0.0495756	1.31371

## Sheet:  M - C all 
Row	Col	ControlType	ProbeName	SystematicName	gene_id	Symbol	GeneName	logFC	AveExpr	t	P.Value	adj.P.Val	B
279	127	0	A_23_P414312	NM_152643	85442	KNDC1	kinase non-catalytic C-lobe domain (KIND) containing 1	-2.61248	6.49149	-1.49722	0.169665	0.576217	-5.30567
32	69	0	A_21_P0004684	ENST00000454262	NA	XLOC_005462		-2.56853	11.0782	-26.0713	1.43317e-09	2.10379e-05	9.20825
162	45	0	A_24_P330822	NM_000458	6928	HNF1B	HNF1 homeobox B	-2.43204	9.38675	-43.8893	1.58532e-11	9.30853e-07	10.2708
87	85	0	A_24_P631848	BC036435	100132147	LOC100132147	uncharacterized LOC100132147	2.0155	9.7903	4.33539	0.00204113	0.149251	-1.08469
86	54	0	A_23_P24135	NM_001057	6865	TACR2	tachykinin receptor 2	-1.87505	10.1561	-3.15529	0.0121195	0.274446	-2.83507
244	35	0	A_33_P3384710	NM_018182	55731	C17orf63	chromosome 17 open reading frame 63	1.83795	11.1654	15.708	1.08466e-07	0.0003352	7.18454
18	68	0	A_21_P0006943	TCONS_00018398	NA	XLOC_008683		1.80032	6.4938	2.66032	0.0267578	0.336515	-3.6045
73	45	0	A_33_P3277883	NR_033828	100129931	LOC100129931	uncharacterized LOC100129931	-1.77397	9.62979	-7.82782	3.17243e-05	0.017811	2.86119
317	155	0	A_21_P0008252	TCONS_00022267	NA	XLOC_010588		1.7387	10.9856	3.51347	0.00692691	0.226267	-2.28643
26	85	0	A_33_P3379922	NM_000312	5624	PROC	protein C (inactivator of coagulation factors Va and VIIIa)	-1.70573	8.30025	-28.0207	7.69903e-10	1.50688e-05	9.40911
234	63	0	A_21_P0014791	XR_132586	NA	LOC100652804	uncharacterized LOC100652804	1.64693	12.2581	17.123	5.22751e-08	0.000219246	7.60733
17	69	0	A_21_P0001671	TCONS_00001982	NA	XLOC_000133		1.61703	6.49405	2.8855	0.0186237	0.305857	-3.2539
144	121	0	A_33_P3264444	ENST00000482292	10471	PFDN6	prefoldin subunit 6	1.59574	12.0818	13.6419	3.54657e-07	0.000867684	6.42767
14	143	0	A_21_P0009321	BG396223	NA	XLOC_012457		1.56803	6.45113	1.88461	0.0932158	0.484361	-4.77736
23	107	0	A_33_P3247210	A_33_P3247210	NA			-1.5472	8.89828	-29.1476	5.47907e-10	1.50688e-05	9.51065
329	137	0	A_21_P0000079	NM_032440	NA	LCOR	ligand dependent nuclear receptor corepressor	1.52833	10.4542	1.27891	0.233949	0.629866	-5.57266
200	61	0	A_33_P3418194	NM_023946	66004	LYNX1	Ly6/neurotoxin 1	1.51711	14.1043	21.8759	6.47001e-09	7.598e-05	8.63228
12	53	0	A_21_P0005143	AK093114	NA	XLOC_005531		1.51063	6.62762	1.93805	0.0856469	0.471104	-4.70028
123	58	0	A_33_P3410235	NM_144565	90527	DUOXA1	dual oxidase maturation factor 1	1.50855	8.2229	10.0857	4.26444e-06	0.00417325	4.57488
204	151	0	A_33_P3407601	THC2753069	NA			1.49623	13.9739	6.82016	9.03867e-05	0.034867	1.90758
191	30	0	A_21_P0007989	ENST00000415620	NA	XLOC_010583		-1.49088	6.11406	-2.79046	0.0216944	0.319469	-3.40191
220	26	0	A_23_P72737	NM_003641	8519	IFITM1	interferon induced transmembrane protein 1 (9-27)	-1.47477	8.22914	-6.99043	7.5148e-05	0.0315176	2.07821
12	158	0	A_21_P0013539	ENST00000519714	NA	XLOC_l2_014219		1.46969	6.43394	1.86317	0.0964255	0.488677	-4.80803
274	14	0	A_23_P353574	NM_133494	140609	NEK7	NIMA (never in mitosis gene a)-related kinase 7	-1.44382	7.03051	-2.0666	0.0697693	0.445144	-4.51176
245	80	0	A_33_P3390107	NR_003286	100008588	RN18S1	RNA, 18S ribosomal 1	1.4413	16.2389	7.43932	4.69018e-05	0.0225732	2.5092
269	14	0	A_21_P0008009	THC2516791	NA	XLOC_010683		-1.41931	6.14632	-1.47047	0.17661	0.582583	-5.33976
202	75	0	A_23_P105705	NM_020996	2251	FGF6	fibroblast growth factor 6	-1.41084	6.10312	-2.61089	0.0289821	0.345953	-3.68132
49	66	0	A_21_P0004719	ENST00000443445	NA	XLOC_005584		-1.40603	6.16701	-1.49809	0.169444	0.576066	-5.30456
19	69	0	A_23_P206806	NM_002209	3683	ITGAL	integrin, alpha L (antigen CD11A (p180), lymphocyte function-associated antigen 1; alpha polypeptide)	1.40255	6.65714	2.79951	0.0213811	0.318315	-3.38783
17	68	0	A_21_P0012064	CR600703	NA	XLOC_l2_007986		1.4008	6.44723	2.27705	0.0497276	0.4058	-4.19541
167	102	0	A_21_P0002603	TCONS_00004842	NA	XLOC_001564		-1.34328	6.10283	-2.99997	0.015509	0.293283	-3.07584
281	119	0	A_33_P3291349	ENST00000319040	55197	RPRD1A	regulation of nuclear pre-mRNA domain containing 1A	1.33704	10.5282	1.43138	0.187207	0.592429	-5.38893
137	101	0	A_33_P3423941	NM_003641	8519	IFITM1	interferon induced transmembrane protein 1 (9-27)	-1.32276	7.66766	-7.57677	4.07715e-05	0.020288	2.6359
173	73	0	A_33_P3414017	A_33_P3414017	NA			1.31995	13.591	12.4801	7.44117e-07	0.0013439	5.91133
166	102	0	A_23_P203558	NM_000518	3043	HBB	hemoglobin, beta	-1.31172	6.13929	-3.05895	0.0141191	0.285801	-2.98427
315	38	0	A_21_P0012311	NM_014246	NA	CELSR1	cadherin, EGF LAG seven-pass G-type receptor 1 (flamingo homolog, Drosophila)	1.29756	7.32104	1.2	0.261759	0.649178	-5.6623
11	54	0	A_21_P0010183	NR_024090	NA	LINC00320	long intergenic non-protein coding RNA 320	1.2933	7.03528	2.03693	0.0731615	0.45006	-4.55563
10	157	0	A_21_P0002664	TCONS_00005168	NA	XLOC_002128		1.2838	6.23416	1.98198	0.0798675	0.461739	-4.63633
65	31	0	A_33_P3375762	NR_040117	392364	LOC392364	chromosome 15 open reading frame 2 pseudogene	-1.28299	7.61403	-18.2838	2.99408e-08	0.000159821	7.90746
10	53	0	A_33_P3289576	NM_025184	80258	EFHC2	EF-hand domain (C-terminal) containing 2	1.28244	7.07238	1.85823	0.0971801	0.489725	-4.81508
229	140	0	A_24_P87931	NM_145343	8542	APOL1	apolipoprotein L, 1	1.27928	10.6389	10.5688	2.91729e-06	0.00335871	4.87894
172	122	0	A_23_P156289	NM_003999	9180	OSMR	oncostatin M receptor	-1.26926	6.39608	-2.48785	0.0353626	0.366155	-3.87195
164	104	0	A_21_P0002291	TCONS_00003868	NA	XLOC_001667		-1.26735	6.02914	-2.24231	0.0525959	0.410674	-4.24817
328	137	0	A_33_P3303372	NM_001184792	56288	PARD3	par-3 partitioning defective 3 homolog (C. elegans)	1.25513	12.0864	1.45243	0.181433	0.586954	-5.36255
363	149	0	A_21_P0002876	ENST00000503572	NA	XLOC_003245		1.25465	10.0082	2.90044	0.0181833	0.30486	-3.23065
74	11	0	A_21_P0007332	TCONS_00019600	NA	XLOC_009403		1.22813	6.3981	1.07047	0.31317	0.682277	-5.80047
191	60	0	A_23_P29079	NM_002626	5211	PFKL	phosphofructokinase, liver	1.22688	12.971	9.6084	6.30247e-06	0.00544209	4.25485
164	47	0	A_33_P3223678	NM_014564	8022	LHX3	LIM homeobox 3	1.21182	14.0809	13.7843	3.25179e-07	0.000830153	6.48602
7	134	0	A_23_P49546	NM_000835	2905	GRIN2C	glutamate receptor, ionotropic, N-methyl D-aspartate 2C	-1.20927	9.02644	-12.6244	6.76441e-07	0.0013439	5.97956
230	45	0	A_21_P0001811	TCONS_00003548	NA	XLOC_001320		1.20284	11.5062	16.7141	6.41627e-08	0.000235465	7.49204
328	138	0	A_23_P110243	NM_020961	57721	METTL14	methyltransferase like 14	1.19466	9.45291	1.32695	0.218255	0.618945	-5.51621
278	117	0	A_23_P68007	NM_001679	483	ATP1B3	ATPase, Na+/K+ transporting, beta 3 polypeptide	1.19436	14.7179	1.34871	0.211447	0.613355	-5.4902
165	102	0	A_33_P3267395	NM_152512	150350	ENTHD1	ENTH domain containing 1	-1.17408	5.94302	-3.21114	0.0110971	0.266197	-2.74882
298	132	0	A_24_P358305	A_24_P358305	NA			1.17066	10.3141	2.51052	0.0340892	0.361475	-3.83691
376	152	0	A_23_P11843	NM_201630	10446	LRRN2	leucine rich repeat neuronal 2	-1.17015	9.5041	-12.5718	7.0029e-07	0.0013439	5.95483
20	68	0	A_23_P146111	NM_024759	79815	NIPAL2	NIPA-like domain containing 2	1.16868	6.59692	1.98441	0.079559	0.461206	-4.63278
93	66	0	A_21_P0005262	ENST00000420268	NA	XLOC_006260		1.16475	12.2186	5.55719	0.000396886	0.0739808	0.509009
13	158	0	A_21_P0000419	NR_003215	NA	SNORD114-22	small nucleolar RNA, C/D box 114-22	1.15257	6.43957	1.44054	0.184674	0.590694	-5.37747
121	16	0	A_33_P3394710	NM_001168398	10559	SLC35A1	solute carrier family 35 (CMP-sialic acid transporter), member A1	1.13921	8.96574	1.23882	0.247754	0.639391	-5.61869
146	138	0	A_21_P0000760	NR_038318	NA	LOC100526771	uncharacterized LOC100526771	1.13053	13.025	4.77038	0.00111155	0.12154	-0.489475
210	68	0	A_23_P82795	NR_040035	83655	LINC00208	long intergenic non-protein coding RNA 208	-1.12854	5.90007	-2.88477	0.0186456	0.305857	-3.25504
225	52	0	A_33_P3308626	NM_014940	22879	MON1B	MON1 homolog B (yeast)	1.11659	13.4298	9.45237	7.18667e-06	0.00602828	4.14571
225	84	0	A_21_P0003335	ENST00000509244	NA	XLOC_003457		-1.11501	5.95534	-1.50325	0.168134	0.57491	-5.29794
286	123	0	A_33_P3231242	A_33_P3231242	NA			1.11262	13.7665	1.33661	0.21521	0.616445	-5.5047
282	33	0	A_33_P3263284	NR_024563	100130238	LOC100130238	uncharacterized LOC100130238	1.11039	11.4557	11.4644	1.49979e-06	0.00204799	5.39421
278	3	0	A_33_P3263955	NM_001001712	414332	LCN10	lipocalin 10	-1.10832	6.03098	-1.97198	0.0811496	0.463467	-4.65094
180	100	0	A_21_P0007832	ENST00000474954	NA	XLOC_009713		-1.10573	5.99505	-1.66111	0.132181	0.536864	-5.08948
114	41	0	A_33_P3211078	NM_003484	8091	HMGA2	high mobility group AT-hook 2	1.10449	12.2056	14.3335	2.34406e-07	0.000655409	6.70201
227	94	0	A_33_P3308299	ENST00000454777	NA			-1.10021	5.86318	-1.67618	0.129141	0.533102	-5.06901
296	48	0	A_23_P52266	NM_001548	3434	IFIT1	interferon-induced protein with tetratricopeptide repeats 1	-1.09942	10.4391	-7.70503	3.58381e-05	0.0191661	2.75197
188	109	0	A_21_P0010312	TCONS_00029216	NA	XLOC_013942		-1.08937	6.17542	-2.26261	0.0509008	0.408476	-4.21737
89	70	0	A_21_P0011274	TCONS_l2_00008281	NA	XLOC_l2_004546		1.08389	6.33786	1.79561	0.107234	0.504118	-4.90375
191	109	0	A_21_P0004911	TCONS_00011894	NA	XLOC_005397		-1.08038	5.90013	-2.71068	0.0246695	0.330326	-3.52615
15	157	0	A_33_P3233100	A_33_P3233100	NA			1.0782	6.3142	1.30423	0.225564	0.624148	-5.54308
60	41	0	A_33_P3283611	NM_001549	3437	IFIT3	interferon-induced protein with tetratricopeptide repeats 3	-1.07554	6.73925	-8.06413	2.51926e-05	0.0155709	3.06624
165	104	0	A_21_P0002309	TCONS_00003924	NA	XLOC_001734		-1.06871	5.97386	-2.04545	0.0721709	0.447648	-4.54305
303	143	0	A_21_P0000107	NM_001190489	NA	MTRNR2L7	MT-RNR2-like 7	1.05873	11.09	1.63144	0.138355	0.544104	-5.1295
10	158	0	A_33_P3827035	NR_003291	348840	LOC348840	uncharacterized LOC348840	1.05222	6.71654	2.07628	0.0686958	0.443296	-4.4974
184	17	0	A_33_P3495962	BM918074	26777	SNORA71A	small nucleolar RNA, H/ACA box 71A	1.05213	11.2866	12.307	8.35427e-07	0.00137448	5.82782
5	58	0	A_24_P270460	NM_005532	3429	IFI27	interferon, alpha-inducible protein 27	-1.04995	11.8181	-5.45454	0.000451712	0.0784922	0.384469
360	157	0	A_32_P379467	NM_020851	57611	ISLR2	immunoglobulin superfamily containing leucine-rich repeat 2	-1.04972	12.6899	-4.00897	0.00327916	0.177459	-1.55071
255	29	0	A_21_P0009511	THC2778958	NA	XLOC_012737		-1.04642	5.66556	-1.60982	0.143017	0.548706	-5.15842
270	36	0	A_33_P3255131	NM_001100915	146212	KCTD19	potassium channel tetramerisation domain containing 19	1.04486	11.4382	4.23102	0.00237126	0.158789	-1.23195
20	4	0	A_21_P0007422	TCONS_00019806	NA	XLOC_009606		1.03916	6.52801	1.5707	0.151819	0.556918	-5.21025
251	59	0	A_24_P508103	NR_026758	440905	LOC440905	uncharacterized LOC440905	-1.03642	5.92663	-1.42928	0.187792	0.592885	-5.39155
114	81	0	A_33_P3365963	A_33_P3365963	NA			1.03117	13.7244	11.32	1.6644e-06	0.00212453	5.31509
259	130	0	A_19_P00809372	XR_109905	NA	LOC100505634		-1.02935	6.05908	-1.56186	0.153873	0.559717	-5.22186
369	1	0	A_23_P11843	NM_201630	10446	LRRN2	leucine rich repeat neuronal 2	-1.02841	9.56056	-12.2941	8.4271e-07	0.00137448	5.82153
302	116	0	A_23_P11843	NM_201630	10446	LRRN2	leucine rich repeat neuronal 2	-1.02075	9.62178	-17.4675	4.41456e-08	0.000199392	7.70044
171	36	0	A_19_P00316479	AK123416	NA	LOC553137	uncharacterized LOC553137	-1.02052	6.82866	-7.81097	3.22568e-05	0.017811	2.84631
144	143	0	A_23_P11843	NM_201630	10446	LRRN2	leucine rich repeat neuronal 2	-1.01527	9.67483	-16.3312	7.8072e-08	0.000269656	7.37915
308	39	0	A_33_P3371144	A_33_P3371144	NA			1.01242	13.243	10.9656	2.15974e-06	0.00264194	5.11463
77	26	0	A_23_P11843	NM_201630	10446	LRRN2	leucine rich repeat neuronal 2	-1.00986	9.5764	-21.2478	8.30373e-09	8.12617e-05	8.52409
285	156	0	A_21_P0009493	TCONS_00026354	NA	XLOC_012707		-1.00642	5.78372	-2.00155	0.0774142	0.457668	-4.60768
299	133	0	A_33_P3218741	A_33_P3218741	NA			1.00295	14.9936	1.51425	0.165372	0.571615	-5.28379
250	83	0	A_21_P0013961	ENST00000456890	NA	LOC100506447	uncharacterized protein LOC100506447	0.998067	10.2104	5.40528	0.000480902	0.0816101	0.324094
267	68	0	A_33_P3272385	NM_001001912	26686	OR4E2	olfactory receptor, family 4, subfamily E, member 2	-0.99748	5.88622	-1.49168	0.171083	0.577281	-5.31276
188	107	0	A_21_P0012195	TCONS_l2_00017187	NA	XLOC_l2_009182		-0.994182	5.91374	-1.77174	0.111315	0.509043	-4.93719
276	114	0	A_23_P322704	NM_001079519	283635	FAM177A1	family with sequence similarity 177, member A1	0.990606	11.5163	1.19432	0.263861	0.649887	-5.6686
313	68	0	A_23_P45871	NM_006820	10964	IFI44L	interferon-induced protein 44-like	-0.988927	7.7003	-6.993	7.49406e-05	0.0315176	2.08076
11	77	0	A_33_P3283900	NM_004937	1497	CTNS	cystinosin, lysosomal cystine transporter	0.978438	7.66739	1.39724	0.196909	0.601463	-5.4312
238	40	0	A_23_P11843	NM_201630	10446	LRRN2	leucine rich repeat neuronal 2	-0.978099	9.6748	-19.4411	1.77472e-08	0.000130858	8.1713
11	144	0	A_21_P0003144	TCONS_00006577	NA	XLOC_003200		0.977587	6.20621	1.774	0.110923	0.50893	-4.93403
214	51	0	A_32_P25357	NM_004933	1013	CDH15	cadherin 15, type 1, M-cadherin (myotubule)	0.977444	9.84441	18.7631	2.40197e-08	0.000141037	8.02072
49	144	0	A_23_P393766	NM_173636	284403	WDR62	WD repeat domain 62	0.977249	6.92207	1.25805	0.241049	0.635635	-5.59674
137	106	0	A_23_P11843	NM_201630	10446	LRRN2	leucine rich repeat neuronal 2	-0.973706	9.77045	-19.3068	1.88284e-08	0.000130858	8.14232
103	19	0	A_24_P384397	NM_133452	125950	RAVER1	ribonucleoprotein, PTB-binding 1	0.973109	12.9791	9.79591	5.39536e-06	0.00479999	4.38302
171	123	0	A_21_P0005727	ENST00000518732	NA	XLOC_006850		-0.972435	5.87281	-3.0992	0.013245	0.282365	-2.92187
257	130	0	A_21_P0010457	THC2718174	NA	XLOC_014410		-0.97133	5.90926	-1.682	0.127985	0.531392	-5.06109
287	163	0	A_23_P11843	NM_201630	10446	LRRN2	leucine rich repeat neuronal 2	-0.97131	9.60282	-12.4455	7.61469e-07	0.0013439	5.89476
16	69	0	A_33_P3403658	CR749422	NA			0.969262	6.95949	2.55179	0.0318878	0.355745	-3.77301
21	68	0	A_21_P0001560	TCONS_00001612	NA	XLOC_000943		0.966485	6.01734	1.90552	0.090181	0.4792	-4.74729
277	14	0	A_23_P140527	NM_012182	27023	FOXB1	forkhead box B1	0.961932	10.569	5.07858	0.000734793	0.100104	-0.0863117
171	22	0	A_21_P0003500	ENST00000506852	NA	XLOC_004066		0.956723	6.24707	2.29433	0.048359	0.40096	-4.1691
16	157	0	A_32_P411945	NM_033030	66037	BOLL	bol, boule-like (Drosophila)	0.954628	6.06149	1.2094	0.258308	0.646652	-5.65182
48	44	0	A_21_P0008063	TCONS_00021787	NA	XLOC_010385		0.941492	6.1253	1.09579	0.30254	0.67609	-5.77438
10	144	0	A_21_P0005303	ENST00000440935	NA	XLOC_006433		0.930828	6.12051	1.70478	0.123548	0.525527	-5.02992
123	6	0	A_21_P0013991	ENST00000426006	NA	LOC100509638		0.929249	7.01963	1.58216	0.149191	0.554538	-5.19514
146	101	0	A_24_P270728	NM_001042483	26471	NUPR1	nuclear protein, transcriptional regulator, 1	0.928783	7.92933	11.4176	1.55112e-06	0.00206994	5.3687
225	112	0	A_23_P139500	NM_030762	79365	BHLHE41	basic helix-loop-helix family, member e41	-0.928749	8.65262	-12.4277	7.70548e-07	0.0013439	5.88623
224	84	0	A_21_P0009108	TCONS_00024862	NA	XLOC_011754		-0.926011	6.01342	-1.5573	0.154942	0.560541	-5.22783
87	35	0	A_33_P3358653	A_33_P3358653	NA			0.924932	6.06681	1.58298	0.149005	0.554443	-5.19405
17	70	0	A_33_P3418803	ENST00000505599	345222	C4orf44	chromosome 4 open reading frame 44	0.923927	6.05442	1.50028	0.168887	0.575509	-5.30175
65	100	0	A_21_P0001086	ENST00000458555	NA	XLOC_000671		0.922417	5.92561	1.24099	0.246992	0.639262	-5.61623
292	132	0	A_33_P3328270	NM_001080482	389813	C9orf172	chromosome 9 open reading frame 172	-0.920446	6.26108	-1.1614	0.276314	0.658381	-5.70467
10	159	0	A_33_P3227482	AK125932	400593	FLJ43944	FLJ43944 protein	0.914224	6.30369	2.20671	0.0557035	0.41708	-4.30204
73	68	0	A_21_P0012021	ENST00000454927	NA	XLOC_l2_007541		0.913383	5.95359	1.15718	0.277946	0.65934	-5.70925
139	97	0	A_23_P11843	NM_201630	10446	LRRN2	leucine rich repeat neuronal 2	-0.911954	9.74885	-19.1642	2.00577e-08	0.000130858	8.1111
379	12	0	A_33_P3214943	NM_001134434	9806	SPOCK2	sparc/osteonectin, cwcv and kazal-like domains proteoglycan (testican) 2	-0.911236	11.2147	-10.3352	3.49851e-06	0.00367499	4.73432
357	7	0	A_24_P57898	NM_080606	128408	BHLHE23	basic helix-loop-helix family, member e23	0.910391	13.2174	7.22576	5.85339e-05	0.0266429	2.30751
329	163	0	A_23_P139786	NM_003733	8638	OASL	2'-5'-oligoadenylate synthetase-like	-0.909858	6.87806	-8.0143	2.64357e-05	0.0160023	3.02355
254	129	0	A_21_P0009480	TCONS_00026332	NA	XLOC_012679		-0.909449	5.77453	-1.82348	0.102644	0.496578	-4.86444
100	76	0	A_21_P0006948	TCONS_00018404	NA	XLOC_008689		0.90889	6.07537	1.4969	0.169746	0.576277	-5.30608
25	149	0	A_33_P3356886	NM_198459	163259	DENND2C	DENN/MADD domain containing 2C	0.907755	6.06889	1.23558	0.248898	0.640203	-5.62237
13	54	0	A_33_P3342076	NM_015866	7799	PRDM2	PR domain containing 2, with ZNF domain	0.903946	8.54902	2.24559	0.0523183	0.410406	-4.2432
256	129	0	A_21_P0006691	ENST00000441457	NA	XLOC_008540		-0.902843	5.86417	-1.59865	0.145482	0.551257	-5.17329
110	90	0	A_23_P11843	NM_201630	10446	LRRN2	leucine rich repeat neuronal 2	-0.902734	9.76914	-13.0424	5.15959e-07	0.00112206	6.17048
265	69	0	A_33_P3232080	NM_020406	57126	CD177	CD177 molecule	-0.902557	5.84468	-1.64912	0.134644	0.539916	-5.10569
214	19	0	A_23_P114713	NM_000779	1580	CYP4B1	cytochrome P450, family 4, subfamily B, polypeptide 1	-0.901067	5.90699	-1.34251	0.213367	0.61489	-5.49763
11	159	0	A_19_P00320675	NR_034179	NA	LOC653712		0.900582	6.65758	2.00461	0.0770372	0.456904	-4.60319
239	95	0	A_33_P3276904	ENST00000390348	NA			-0.898851	5.88406	-1.45773	0.180005	0.585706	-5.35587
256	49	0	A_21_P0013273	TCONS_l2_00026242	NA	XLOC_l2_013628		-0.897098	6.06442	-1.49663	0.169817	0.576299	-5.30643
267	37	0	A_23_P106362	NM_020980	366	AQP9	aquaporin 9	-0.896452	5.78679	-1.43928	0.185021	0.590768	-5.37905
311	5	0	A_21_P0004222	TCONS_00009863	NA	XLOC_004277		-0.896247	5.45727	-1.57124	0.151694	0.556918	-5.20954
220	130	0	A_23_P362810	NR_026866	132200	C3orf49	chromosome 3 open reading frame 49	-0.896242	5.98192	-2.20841	0.0555509	0.416592	-4.29947
209	48	0	A_33_P3265699	NM_001005515	403274	OR5H15	olfactory receptor, family 5, subfamily H, member 15	-0.893388	5.68868	-2.09414	0.0667569	0.440327	-4.47085
183	139	0	A_33_P3418091	NM_001130136	57611	ISLR2	immunoglobulin superfamily containing leucine-rich repeat 2	-0.89263	10.5038	-4.06133	0.00303592	0.173743	-1.47489
323	137	0	A_23_P100074	NM_020371	57099	AVEN	apoptosis, caspase activation inhibitor	0.892102	11.3923	1.44223	0.184212	0.590266	-5.37536
7	43	0	A_21_P0012591	NM_001073	NA	UGT2B11	UDP glucuronosyltransferase 2 family, polypeptide B11	0.889997	6.84295	1.37735	0.202761	0.606053	-5.45554
384	116	0	A_33_P3424467	NM_152609	163882	CNST	consortin, connexin sorting protein	-0.887592	9.98516	-9.57811	6.46424e-06	0.00550088	4.23384
135	71	0	A_23_P84230	NM_032109	23440	OTP	orthopedia homeobox	-0.886132	7.36387	-15.8825	9.88053e-08	0.000322308	7.24045
315	5	0	A_21_P0000991	ENST00000419658	NA	XLOC_000269		-0.883301	5.81809	-1.39319	0.198087	0.602241	-5.43617
185	33	0	A_21_P0002815	ENST00000451348	NA	XLOC_002950		-0.880281	5.9653	-2.16647	0.0594331	0.425259	-4.36267
6	43	0	A_21_P0001338	BX108687	NA	XLOC_000293		0.880146	6.75621	1.24839	0.2444	0.637657	-5.6078
45	45	0	A_21_P0005835	NR_038236	NA	LOC100507632	uncharacterized LOC100507632	0.878942	6.05764	1.25012	0.243795	0.637521	-5.60581
310	5	0	A_21_P0008641	TCONS_00023960	NA	XLOC_011281		-0.878546	5.56409	-1.43025	0.18752	0.592538	-5.39033
320	94	0	A_33_P3375284	A_33_P3375284	NA			-0.878438	6.02863	-1.2421	0.2466	0.639236	-5.61496
167	66	0	A_23_P105794	NM_033255	94240	EPSTI1	epithelial stromal interaction 1 (breast)	-0.876157	6.0774	-1.56387	0.153404	0.559345	-5.21922
180	99	0	A_21_P0001115	ENST00000445180	NA	XLOC_000766		-0.87309	6.09982	-1.94547	0.0846445	0.469649	-4.68952
275	20	0	A_33_P3374253	XM_001717762	NA			0.871599	8.60928	6.16297	0.000190336	0.0529668	1.21003
279	118	0	A_33_P3328426	NM_001204831	55129	ANO10	anoctamin 10	0.870987	12.8811	1.44038	0.184719	0.590694	-5.37768
43	28	0	A_23_P169017	NM_018661	55894	DEFB103B	defensin, beta 103B	0.868827	6.16706	1.11056	0.296471	0.672483	-5.75895
149	62	0	A_23_P303978	XR_108755	285943	LOC285943	uncharacterized LOC285943	-0.868448	5.88702	-2.38008	0.0420992	0.384857	-4.03795
46	114	0	A_21_P0008330	TCONS_00022484	NA	XLOC_010811		0.8683	6.02635	1.26815	0.237589	0.632877	-5.58512
255	130	0	A_24_P843020	THC2767512	NA			-0.867855	6.06745	-1.72783	0.119204	0.519434	-4.99819
277	3	0	A_21_P0010926	ENST00000438082	NA	XLOC_l2_001667		-0.866754	6.06522	-1.77298	0.1111	0.508989	-4.93546
278	2	0	A_23_P107102	NM_032559	84643	KIF2B	kinesin family member 2B	-0.864096	6.3786	-1.83502	0.100798	0.494872	-4.84809
10	108	0	A_23_P380318	NM_001965	1961	EGR4	early growth response 4	-0.862309	7.17227	-10.503	3.06935e-06	0.00346583	4.83866
282	3	0	A_33_P3221980	A_33_P3221980	NA			-0.861742	6.04632	-1.28137	0.233123	0.629161	-5.56981
214	151	0	A_23_P37167	NM_002471	4624	MYH6	myosin, heavy chain 6, cardiac muscle, alpha	-0.861075	5.96001	-1.58877	0.147695	0.553502	-5.1864
12	31	0	A_24_P58673	NM_032044	83998	REG4	regenerating islet-derived family, member 4	0.860324	6.01194	1.15299	0.279572	0.660164	-5.71378
203	88	0	A_33_P3746734	NR_038901	552859	LINC00251	long intergenic non-protein coding RNA 251	-0.858489	5.77045	-1.51609	0.164912	0.571188	-5.28141
186	36	0	A_21_P0004496	TCONS_00010652	NA	XLOC_004325		-0.857895	6.03482	-1.57436	0.150974	0.556158	-5.20542
41	29	0	A_23_P123228	NM_000111	1811	SLC26A3	solute carrier family 26, member 3	0.857498	6.0027	1.04434	0.324445	0.689583	-5.82692
301	58	0	A_21_P0012887	ENST00000343123	NA	XLOC_l2_011911		0.856721	10.4277	10.3328	3.50494e-06	0.00367499	4.73284
21	5	0	A_21_P0004501	TCONS_00010665	NA	XLOC_004341		0.856153	5.95503	1.07979	0.309225	0.680309	-5.79093
37	21	0	A_33_P3242609	NM_001001670	389763	FAM75D1	family with sequence similarity 75, member D1	0.851106	6.14908	0.979893	0.353569	0.706162	-5.88994
213	69	0	A_24_P397817	NM_000230	3952	LEP	leptin	-0.850699	6.37331	-1.87335	0.0948882	0.486582	-4.79348
113	101	0	A_21_P0012000	ENST00000423663	NA	XLOC_l2_007274		0.847272	5.97259	1.90319	0.0905143	0.479968	-4.75064
12	76	0	A_23_P336506	NM_023917	50835	TAS2R9	taste receptor, type 2, member 9	0.845458	6.40175	1.1276	0.289589	0.667209	-5.74096
46	31	0	A_23_P428485	NM_030623	80309	SPHKAP	SPHK1 interactor, AKAP domain containing	0.845268	6.09344	0.933032	0.375942	0.720438	-5.93376
240	116	0	A_23_P41395	NM_000730	886	CCKAR	cholecystokinin A receptor	-0.844804	5.78665	-1.58664	0.148175	0.553848	-5.18921
269	37	0	A_24_P12059	NM_002099	2993	GYPA	glycophorin A (MNS blood group)	-0.844089	5.74865	-1.52068	0.163775	0.569904	-5.27549
246	20	0	A_21_P0011680	THC2641537	NA	XLOC_l2_006648		-0.84364	5.79506	-1.54052	0.158936	0.564674	-5.24975
163	104	0	A_21_P0003868	THC2648791	NA	XLOC_003807		-0.842506	6.38349	-1.75838	0.113664	0.512626	-4.95583
11	157	0	A_21_P0006298	TCONS_00016430	NA	XLOC_007796		0.842222	6.23048	1.20515	0.259865	0.647753	-5.65657
186	110	0	A_23_P107623	NM_080474	89777	SERPINB12	serpin peptidase inhibitor, clade B (ovalbumin), member 12	-0.838212	5.6758	-1.63791	0.136987	0.542366	-5.1208
71	68	0	A_24_P691826	THC2682885	NA			0.834984	6.05304	1.30049	0.226785	0.625034	-5.54748
107	131	0	A_33_P3404706	NM_001030288	6693	SPN	sialophorin	0.834348	6.43638	3.70896	0.00513711	0.206317	-1.99245
199	29	0	A_21_P0012791	ENST00000509671	NA	XLOC_l2_011255		-0.834022	5.84504	-1.36054	0.207821	0.609979	-5.47594
149	141	0	A_23_P52668	NM_005468	10004	NAALADL1	N-acetylated alpha-linked acidic dipeptidase-like 1	-0.833228	5.81836	-1.95745	0.0830475	0.466693	-4.67211
275	14	0	A_23_P105651	NM_013377	29951	PDZRN4	PDZ domain containing ring finger 4	-0.827013	7.99711	-2.01174	0.0761663	0.455161	-4.59273
79	3	0	A_21_P0007562	TCONS_00020435	NA	XLOC_009765		0.826052	6.25557	1.97171	0.0811842	0.463467	-4.65133
234	160	0	A_24_P366122	NM_024722	79777	ACBD4	acyl-CoA binding domain containing 4	0.823087	9.79593	2.9795	0.0160239	0.295501	-3.10766
12	54	0	A_23_P70095	NM_001025158	972	CD74	CD74 molecule, major histocompatibility complex, class II invariant chain	0.823084	6.00636	1.2103	0.257982	0.646371	-5.65083
74	141	0	A_21_P0010985	TCONS_l2_00004592	NA	XLOC_l2_002355		0.82111	6.06174	1.18335	0.26796	0.652178	-5.6807
182	90	0	A_24_P150931	NM_007225	11248	NXPH3	neurexophilin 3	-0.818646	5.98517	-1.5853	0.148478	0.554292	-5.19098
169	123	0	A_21_P0009904	ENST00000428999	NA	XLOC_013772		-0.818546	5.61425	-3.06736	0.0139317	0.284166	-2.97123
87	70	0	A_33_P3258244	NM_001142771	65217	PCDH15	protocadherin-related 15	0.818484	6.32337	1.79026	0.108136	0.50502	-4.91126
253	29	0	A_21_P0011563	TCONS_l2_00011028	NA	XLOC_l2_005933		-0.817713	6.08871	-1.44217	0.184227	0.590266	-5.37543
216	58	0	A_21_P0013700	BC039548	NA	XLOC_l2_014841		-0.817611	5.83748	-2.61859	0.0286234	0.344684	-3.66935
232	134	0	A_24_P781615	NR_002773	90586	AOC4	AOC3 pseudogene	-0.817364	6.22209	-1.77681	0.110437	0.508032	-4.9301
256	69	0	A_21_P0002513	TCONS_00004473	NA	XLOC_002353		-0.81506	5.79734	-1.46569	0.177876	0.583981	-5.34581
250	20	0	A_21_P0008932	TCONS_00024390	NA	XLOC_011715		-0.81416	5.81571	-1.54691	0.157403	0.562826	-5.24141
252	59	0	A_24_P273180	XR_109745	649179	PRAMEL	preferentially expressed antigen in melanoma-like	-0.813909	5.63145	-1.39134	0.198628	0.602427	-5.43844
146	58	0	A_23_P364355	ENST00000390361	NA			-0.811324	7.21806	-2.35464	0.0438677	0.388914	-4.07696
280	117	0	A_33_P3285470	NM_001702	575	BAI1	brain-specific angiogenesis inhibitor 1	0.809434	12.2475	1.46969	0.176818	0.5827	-5.34076
100	77	0	A_33_P3275280	XR_110857	440742	LOC440742	uncharacterized LOC440742	0.809078	6.12992	1.75713	0.113886	0.513083	-4.95757
296	133	0	A_33_P3382944	NM_198537	374887	YJEFN3	YjeF N-terminal domain containing 3	0.80893	12.7875	5.72482	0.000322277	0.067231	0.708781
13	143	0	A_23_P112016	NM_024767	10395	DLC1	deleted in liver cancer 1	0.807615	6.9083	1.79169	0.107895	0.504672	-4.90926
215	57	0	A_21_P0004197	TCONS_00009834	NA	XLOC_004250		-0.807244	5.76101	-1.50069	0.168781	0.575479	-5.30122
42	28	0	A_33_P3375259	AK097584	100128830	LOC100128830	uncharacterized LOC100128830	0.807142	6.1341	1.18853	0.266017	0.651074	-5.67499
43	32	0	A_21_P0014936	XR_108459	NA	LOC100506487	uncharacterized LOC100506487	0.805696	6.03657	1.00726	0.340968	0.698996	-5.86356
42	31	0	A_21_P0005204	TCONS_00012933	NA	XLOC_005953		0.804762	6.18708	1.13122	0.288145	0.665971	-5.73711
206	36	0	A_21_P0006411	ENST00000453953	NA	XLOC_007917		-0.804465	5.78239	-1.52055	0.163807	0.569904	-5.27565
253	109	0	A_33_P3310709	AB529275	NA			-0.804405	5.76685	-1.34743	0.211841	0.613928	-5.49173
269	117	0	A_21_P0004725	ENST00000415575	NA	XLOC_005599		-0.803869	6.71636	-2.68078	0.0258884	0.332927	-3.57267
135	39	0	A_21_P0008859	TCONS_00024182	NA	XLOC_011544		0.801138	5.76964	1.78797	0.108526	0.505257	-4.91448
245	94	0	A_33_P3363016	NM_001242790	2972	BRF1	BRF1 homolog, subunit of RNA polymerase III transcription initiation factor IIIB (S. cerevisiae)	-0.800466	10.2777	-18.0096	3.40473e-08	0.000166596	7.83999
224	86	0	A_23_P419150	NM_014468	27287	VENTX	VENT homeobox	-0.79832	5.7503	-1.93174	0.0865101	0.472724	-4.70943
134	133	0	A_23_P103803	NM_052939	115352	FCRL3	Fc receptor-like 3	-0.797521	5.90519	-2.1495	0.0610772	0.428707	-4.38813
127	117	0	A_33_P3330149	NM_000280	5080	PAX6	paired box 6	0.792308	5.96256	1.49776	0.169527	0.576103	-5.30498
182	18	0	A_21_P0001127	ENST00000444042	NA	XLOC_000820		-0.791142	6.0659	-1.81363	0.104245	0.499586	-4.87836
275	3	0	A_19_P00801897	XR_109632	NA	LOC729296	uncharacterized LOC729296	-0.790603	6.07239	-1.77934	0.11	0.507386	-4.92656
19	68	0	A_23_P91104	NM_002246	3777	KCNK3	potassium channel, subfamily K, member 3	0.79045	8.53167	2.46363	0.0367766	0.370425	-3.90937
129	107	0	A_21_P0005020	NR_026816	NA	PSORS1C3	psoriasis susceptibility 1 candidate 3 (non-protein coding)	0.788907	6.52733	1.2491	0.244151	0.637657	-5.60698
274	115	0	A_24_P319923	NM_053025	4638	MYLK	myosin light chain kinase	0.787951	10.2958	1.54626	0.157559	0.562826	-5.24226
13	145	0	A_21_P0005272	ENST00000444158	NA	XLOC_006315		0.78726	6.10228	1.48041	0.174001	0.57992	-5.32714
158	69	0	A_33_P3391521	ENST00000366589	56605	ERO1LB	ERO1-like beta (S. cerevisiae)	-0.786937	6.05167	-1.618	0.141238	0.547235	-5.1475
14	157	0	A_21_P0000417	NR_003213	NA	SNORD114-20	small nucleolar RNA, C/D box 114-20	0.786057	6.44776	1.44663	0.183008	0.588777	-5.36984
249	46	0	A_21_P0010279	TCONS_00029125	NA	XLOC_014072		-0.785956	6.08874	-1.3284	0.217797	0.61839	-5.51449
172	150	0	A_24_P356916	NM_001011554	64849	SLC13A3	solute carrier family 13 (sodium-dependent dicarboxylate transporter), member 3	-0.785087	7.12674	-11.5926	1.36871e-06	0.00194844	5.46322
9	157	0	A_23_P113572	NM_001770	930	CD19	CD19 molecule	0.782854	6.31644	1.32479	0.218942	0.619249	-5.51878
35	21	0	A_23_P112016	NM_024767	10395	DLC1	deleted in liver cancer 1	0.78239	6.86024	1.0449	0.324198	0.689425	-5.82635
5	44	0	A_33_P3320241	A_33_P3320241	NA			0.781967	6.09507	1.21986	0.254516	0.644202	-5.64011
258	149	0	A_33_P3279640	NM_001194	610	HCN2	hyperpolarization activated cyclic nucleotide-gated potassium channel 2	0.781555	15.8019	4.12561	0.00276332	0.168319	-1.38236
74	68	0	A_23_P46829	NM_033163	2253	FGF8	fibroblast growth factor 8 (androgen-induced)	0.778687	6.25951	1.15471	0.278904	0.659791	-5.71192
111	101	0	A_23_P105691	NM_018654	55507	GPRC5D	G protein-coupled receptor, family C, group 5, member D	0.777683	6.19879	1.54969	0.156742	0.562152	-5.23779
287	156	0	A_33_P3346806	AK092544	100131581	LOC100131581	uncharacterized LOC100131581	-0.777592	5.69254	-1.55534	0.155404	0.560794	-5.2304
156	43	0	A_19_P00320664	NR_033896	NA	FLJ46906	uncharacterized LOC441172	-0.775462	6.13295	-1.77091	0.111461	0.509512	-4.93836
18	5	0	A_24_P22943	NM_133261	126326	GIPC3	GIPC PDZ domain containing family, member 3	0.774692	5.95979	1.12475	0.290731	0.667992	-5.74398
306	136	0	A_33_P3417820	NM_024313	79159	NOL12	nucleolar protein 12	0.774481	13.5586	1.3935	0.197999	0.602139	-5.4358
233	23	0	A_33_P3264910	NM_177400	84504	NKX6-2	NK6 homeobox 2	-0.774321	6.69355	-2.66704	0.0264692	0.335403	-3.59405
232	91	0	A_24_P194081	NM_144779	53827	FXYD5	FXYD domain containing ion transport regulator 5	-0.771533	6.16534	-1.33845	0.214632	0.616295	-5.50249
267	4	0	A_21_P0010672	TCONS_l2_00001781	NA	XLOC_l2_001310		-0.770732	5.84231	-2.13115	0.0629063	0.432207	-4.41563
208	47	0	A_21_P0007377	TCONS_00019717	NA	XLOC_009514		-0.770035	5.80051	-1.38485	0.200536	0.603694	-5.44639
216	19	0	A_23_P28224	NM_006920	6323	SCN1A	sodium channel, voltage-gated, type I, alpha subunit	-0.768626	5.82371	-1.45585	0.180511	0.586043	-5.35825
216	23	0	A_21_P0007570	THC2720680	NA	XLOC_009782		-0.767733	5.85745	-1.48741	0.172184	0.577996	-5.31822
240	146	0	A_33_P3335262	AK128088	257062	TMEM146	transmembrane protein 146	-0.767185	5.88016	-1.71985	0.120692	0.521921	-5.0092
13	32	0	A_33_P3298861	NM_024628	84561	SLC12A8	solute carrier family 12 (potassium/chloride transporters), member 8	0.766366	6.32784	1.23912	0.247649	0.639391	-5.61835
263	44	0	A_21_P0012577	TCONS_l2_00020444	NA	XLOC_l2_010602		-0.766073	5.70521	-1.63734	0.137108	0.542584	-5.12157
182	100	0	A_23_P325887	NM_017752	54885	TBC1D8B	TBC1 domain family, member 8B (with GRAM domain)	-0.765595	5.86312	-1.59175	0.147025	0.552668	-5.18245
230	41	0	A_33_P3222769	NM_001013638	388199	PRR25	proline rich 25	0.764252	13.1411	9.22238	8.75029e-06	0.00694312	3.98063
15	40	0	A_23_P41514	NM_139243	132612	ADAD1	adenosine deaminase domain containing 1 (testis-specific)	0.76384	6.12206	0.998141	0.34513	0.701598	-5.87242
348	69	0	A_33_P3692756	NR_027374	723809	LOC723809	uncharacterized LOC723809	-0.763243	6.39899	-1.4118	0.192718	0.597848	-5.41324
40	28	0	A_33_P3386935	NM_032506	84542	KIAA1841	KIAA1841	0.761408	6.28191	1.02873	0.331326	0.693095	-5.84247
239	116	0	A_33_P3210499	ENST00000390398	NA			-0.760804	5.78672	-1.82699	0.10208	0.495701	-4.85948
279	117	0	A_24_P66125	NM_001042749	10735	STAG2	stromal antigen 2	0.760493	11.6216	1.23976	0.247425	0.639391	-5.61763
46	11	0	A_33_P3394599	NM_006339	10362	HMG20B	high mobility group 20B	0.759307	13.0882	3.03761	0.0146066	0.288536	-3.01739
224	85	0	A_24_P109071	NM_017576	55582	KIF27	kinesin family member 27	-0.758847	6.41744	-2.08447	0.0678	0.44176	-4.48523
78	118	0	A_21_P0010568	ENST00000451341	NA	XLOC_l2_000514		0.758681	5.89555	1.3419	0.213559	0.615019	-5.49837
216	56	0	A_21_P0013037	NR_038217	NA	LOC154092	uncharacterized LOC154092	-0.757196	5.84711	-1.35782	0.208648	0.61054	-5.47921
38	109	0	A_21_P0005160	TCONS_00012690	NA	XLOC_005677		0.756828	5.95006	1.0307	0.330452	0.692625	-5.84052
213	57	0	A_33_P3266091	A_33_P3266091	NA			-0.756494	6.02261	-1.50902	0.16668	0.57296	-5.29053
7	88	0	A_23_P145529	NM_181795	5570	PKIB	protein kinase (cAMP-dependent, catalytic) inhibitor beta	0.754674	6.24938	1.14157	0.284041	0.662628	-5.72605
178	64	0	A_21_P0009143	BC041439	NA	XLOC_012048		-0.754484	5.75182	-1.66234	0.13193	0.536279	-5.08781
11	84	0	A_21_P0009086	NR_033925	NA	LOC400550	uncharacterized LOC400550	0.754113	6.3137	1.10335	0.299422	0.6745	-5.7665
189	108	0	A_21_P0012905	TCONS_l2_00022886	NA	XLOC_l2_012023		-0.751548	5.83057	-2.23333	0.0533636	0.412156	-4.26179
226	84	0	A_33_P3227440	AF387616	100287948	GM140	uncharacterized LOC100287948	-0.750794	5.71783	-1.24223	0.246554	0.639236	-5.61482
313	52	0	A_21_P0014269	ENST00000527966	NA	APBB1	amyloid beta (A4) precursor protein-binding, family B, member 1 (Fe65)	-0.750082	6.10791	-1.32864	0.21772	0.61839	-5.5142
199	92	0	A_23_P214144	NM_000493	1300	COL10A1	collagen, type X, alpha 1	-0.749999	8.21807	-11.8552	1.13807e-06	0.00180606	5.60108
162	104	0	A_23_P121459	NM_000460	7066	THPO	thrombopoietin	-0.749462	6.07634	-2.00875	0.07653	0.455886	-4.59711
177	65	0	A_23_P103756	NM_002557	5016	OVGP1	oviductal glycoprotein 1, 120kDa	-0.749092	8.64519	-6.91713	8.13324e-05	0.0331639	2.00525
240	115	0	A_21_P0001695	TCONS_00002104	NA	XLOC_000313		-0.748565	5.74326	-1.51349	0.165562	0.571728	-5.28477
180	19	0	A_23_P78353	NM_005925	4225	MEP1B	meprin A, beta	-0.748553	5.89775	-1.34149	0.213684	0.615198	-5.49885
108	78	0	A_24_P250227	NM_021724	9572	NR1D1	nuclear receptor subfamily 1, group D, member 1	-0.747825	9.0799	-12.4129	7.78181e-07	0.0013439	5.87913
149	13	0	A_21_P0009714	AK125858	NA	XLOC_013045		-0.746296	6.21412	-3.07906	0.0136752	0.283258	-2.95309
136	133	0	A_21_P0005126	TCONS_00011907	NA	XLOC_005406		-0.743008	5.92174	-3.26592	0.0101812	0.257564	-2.66446
214	83	0	A_33_P3362636	NM_001136498	284106	CISD3	CDGSH iron sulfur domain 3	0.742659	14.8035	7.44018	4.68602e-05	0.0225732	2.51001
72	68	0	A_21_P0005873	TCONS_00015107	NA	XLOC_007162		0.741599	6.10316	1.46624	0.177732	0.58389	-5.34513
198	61	0	A_33_P3277805	A_33_P3277805	NA			0.741474	13.2031	5.5689	0.000391102	0.0738403	0.52312
38	21	0	A_21_P0005601	THC2610977	NA	XLOC_006456		0.7413	6.14151	0.974458	0.356112	0.707639	-5.89511
264	125	0	A_21_P0001412	DB315502	NA	XLOC_000544		-0.740284	5.78123	-1.61339	0.142239	0.548185	-5.15366
190	103	0	A_23_P65442	NM_006084	10379	IRF9	interferon regulatory factor 9	-0.739162	10.7886	-6.81105	9.12924e-05	0.034867	1.89834
265	125	0	A_32_P234518	NM_001013579	158833	AWAT1	acyl-CoA wax alcohol acyltransferase 1	-0.737133	5.79646	-1.551	0.15643	0.562085	-5.23607
188	110	0	A_21_P0007612	TCONS_00020535	NA	XLOC_009849		-0.736309	5.75929	-1.52723	0.162163	0.568769	-5.26701
232	100	0	A_32_P137980	NM_032973	83259	PCDH11Y	protocadherin 11 Y-linked	-0.735769	5.62092	-1.37376	0.203831	0.606884	-5.45991
274	125	0	A_33_P3576317	BC044924	340178	LOC340178	uncharacterized LOC340178	-0.733718	5.81601	-1.46843	0.177151	0.583105	-5.34235
353	22	0	A_23_P325642	NM_006849	64714	PDIA2	protein disulfide isomerase family A, member 2	0.732245	10.5558	10.1896	3.92496e-06	0.00397348	4.64192
212	151	0	A_21_P0013711	ENST00000443993	NA	XLOC_l2_015038		-0.731897	5.70276	-1.55693	0.15503	0.560541	-5.22833
363	25	0	A_33_P3350638	A_33_P3350638	NA			-0.731863	8.83178	-13.9993	2.85662e-07	0.000762419	6.57229
221	100	0	A_21_P0008021	BC034786	NA	XLOC_010732		-0.731533	5.66565	-1.62211	0.14035	0.545989	-5.142
65	99	0	A_21_P0003781	TCONS_00008605	NA	XLOC_004111		0.730538	6.10723	1.1442	0.283008	0.661819	-5.72324
205	136	0	A_21_P0007307	NR_033852	NA	LOC283177	uncharacterized LOC283177	-0.728543	6.47846	-1.43189	0.187065	0.592429	-5.38829
256	18	0	A_33_P3210848	NM_001128636	392617	ELFN1	extracellular leucine-rich repeat and fibronectin type III domain containing 1	0.728508	15.0704	4.72679	0.00117988	0.122889	-0.547742
8	53	0	A_23_P163209	NM_020396	10017	BCL2L10	BCL2-like 10 (apoptosis facilitator)	0.727437	6.35433	1.8374	0.100421	0.494294	-4.84471
277	124	0	A_23_P139050	NM_001002918	283160	OR8D2	olfactory receptor, family 8, subfamily D, member 2	-0.725912	5.92402	-1.53603	0.160018	0.566216	-5.25558
63	101	0	A_23_P77908	NM_152908	146802	SLC47A2	solute carrier family 47, member 2	0.724621	6.16714	0.945025	0.37012	0.716658	-5.92271
129	30	0	A_33_P3381777	NM_178174	340205	TREML1	triggering receptor expressed on myeloid cells-like 1	0.724478	5.76357	1.576	0.150598	0.555792	-5.20326
121	108	0	A_33_P3295518	NM_203405	388818	KRTAP26-1	keratin associated protein 26-1	0.72257	5.99417	1.41997	0.190402	0.595687	-5.40312
21	6	0	A_21_P0000151	NM_080873	NA	ASB11	ankyrin repeat and SOCS box containing 11	0.72201	5.9205	1.04879	0.322501	0.688555	-5.82244
96	147	0	A_33_P3331272	A_33_P3331272	NA			0.720748	6.11248	1.37718	0.202812	0.606053	-5.45575
291	156	0	A_19_P00321833	AK097381	NA	P39194		-0.719924	5.72211	-1.65813	0.13279	0.537459	-5.09352
191	123	0	A_23_P35316	NM_020394	57116	ZNF695	zinc finger protein 695	-0.718572	7.25482	-1.81102	0.104674	0.500255	-4.88205
96	160	0	A_33_P3219090	NM_005542	3638	INSIG1	insulin induced gene 1	0.718519	11.281	13.0538	5.12219e-07	0.00112206	6.17555
152	10	0	A_23_P407654	NM_173564	222950	C7orf51	chromosome 7 open reading frame 51	-0.718162	6.37458	-2.08578	0.0676575	0.44176	-4.48328
266	69	0	A_33_P3308672	AK025311	91948	LOC91948	uncharacterized LOC91948	-0.717175	5.93147	-1.94419	0.0848167	0.469709	-4.69138
16	15	0	A_23_P110276	NR_026892	84740	AFAP1-AS1	AFAP1 antisense RNA 1 (non-protein coding)	0.716628	5.93726	1.16795	0.273801	0.65681	-5.69756
274	117	0	A_33_P3304516	NM_021035	57169	ZNFX1	zinc finger, NFX1-type containing 1	-0.716524	6.61616	-1.60093	0.144977	0.550585	-5.17026
249	21	0	A_23_P206359	NM_004360	999	CDH1	cadherin 1, type 1, E-cadherin (epithelial)	-0.716436	5.87535	-1.81921	0.103336	0.497914	-4.87049
195	141	0	A_33_P3235905	A_33_P3235905	NA			-0.715878	5.9661	-1.58752	0.147977	0.553599	-5.18805
134	121	0	A_33_P3334398	NM_001215	765	CA6	carbonic anhydrase VI	0.715351	9.12477	5.23154	0.000601378	0.092312	0.10801
229	100	0	A_23_P106602	NM_031476	83716	CRISPLD2	cysteine-rich secretory protein LCCL domain containing 2	-0.714335	6.25808	-1.46094	0.179143	0.58509	-5.35182
40	14	0	A_21_P0003915	THC2612998	NA	XLOC_004205		0.713892	6.13525	0.969749	0.358326	0.708603	-5.89957
226	117	0	A_33_P3262301	NM_033123	89869	PLCZ1	phospholipase C, zeta 1	-0.713094	5.7025	-1.4885	0.171903	0.57775	-5.31683
11	145	0	A_21_P0010156	ENST00000436529	NA	XLOC_013905		0.711795	6.01312	1.90832	0.0897833	0.47834	-4.74327
12	40	0	A_21_P0003257	TCONS_00007011	NA	XLOC_002884		0.710942	5.9786	1.01932	0.335525	0.69583	-5.85175
358	132	0	A_21_P0006208	TCONS_00016126	NA	XLOC_007511		-0.710364	6.45671	-11.0038	2.09929e-06	0.00262264	5.13665
204	21	0	A_23_P10936	NM_033060	85285	KRTAP4-1	keratin associated protein 4-1	-0.709831	5.67018	-1.58088	0.149483	0.554936	-5.19683
167	111	0	A_23_P126677	NM_021233	58511	DNASE2B	deoxyribonuclease II beta	-0.707942	5.9757	-1.57412	0.151029	0.556164	-5.20574
14	40	0	A_21_P0005842	ENST00000526470	NA	XLOC_007095		0.707942	6.06377	1.11531	0.294539	0.670874	-5.75396
140	29	0	A_23_P121695	NM_006419	10563	CXCL13	chemokine (C-X-C motif) ligand 13	-0.707655	5.91108	-1.83286	0.101142	0.494953	-4.85116
322	136	0	A_23_P355993	NM_025040	80110	ZNF614	zinc finger protein 614	0.707613	8.37901	1.6332	0.137981	0.543566	-5.12713
378	60	0	A_21_P0014045	NM_001097	NA	ACR	acrosin	-0.707044	6.15879	-1.27726	0.234503	0.630361	-5.57457
255	30	0	A_21_P0007061	TCONS_00018208	NA	XLOC_008489		-0.706376	5.81414	-1.42479	0.189047	0.593997	-5.39713
226	53	0	A_21_P0010719	ENST00000412492	NA	XLOC_l2_000399		-0.705927	7.63916	-3.17361	0.0117736	0.271088	-2.80674
312	52	0	A_33_P3347152	ENST00000371458	8464	SUPT3H	suppressor of Ty 3 homolog (S. cerevisiae)	-0.705701	6.5328	-1.44282	0.184049	0.589957	-5.37462
217	22	0	A_21_P0004601	AY314751	NA	TSG1	tumor suppressor TSG1	-0.705042	5.66887	-1.344	0.212905	0.614419	-5.49585
81	4	0	A_21_P0014769	XR_132541	NA	LOC100289298		0.704508	5.96494	2.09512	0.0666517	0.440124	-4.46939
381	149	0	A_21_P0005785	TCONS_00014902	NA	XLOC_006973		-0.703895	10.1167	-5.13343	0.000683587	0.0976598	-0.0161873
167	68	0	A_33_P3368453	NM_000247	100507436	MICA	MHC class I polypeptide-related sequence A	-0.703688	6.39647	-2.08092	0.0681863	0.442167	-4.4905
331	162	0	A_19_P00321761	ENST00000412979	NA	XLOC_002310		-0.703505	6.24475	-2.54122	0.0324376	0.356502	-3.78939
187	109	0	A_24_P557479	NM_017523	54739	XAF1	XIAP associated factor 1	-0.703435	5.97892	-2.60307	0.0293503	0.347468	-3.69345
332	3	0	A_19_P00316838	NM_001145095	NA	HHLA1	HERV-H LTR-associating 1	-0.703328	5.90674	-1.142	0.283875	0.662424	-5.7256
13	123	0	A_21_P0010808	ENST00000454679	NA	C10orf112	chromosome 10 open reading frame 112	0.702582	5.92457	1.09767	0.301763	0.675748	-5.77243
150	10	0	A_21_P0008830	TCONS_00023971	NA	XLOC_011294		-0.702485	6.12156	-2.63224	0.0279993	0.342342	-3.64815
198	3	0	A_23_P102017	NM_020711	57471	ERMN	ermin, ERM-like protein	-0.70236	5.75609	-2.74892	0.023195	0.325956	-3.46662
185	110	0	A_19_P00318938	TCONS_00005491	NA	XLOC_002569		-0.700985	6.59372	-2.07447	0.0688948	0.443296	-4.50008
72	132	0	A_32_P101779	NM_174975	266629	SEC14L3	SEC14-like 3 (S. cerevisiae)	0.700974	6.10899	1.24569	0.245343	0.638208	-5.61088
184	54	0	A_23_P164100	NM_181707	124773	C17orf64	chromosome 17 open reading frame 64	-0.699955	6.23134	-1.43116	0.187266	0.592429	-5.38919
207	135	0	A_33_P3497502	AL833568	283475	LOC283475	uncharacterized LOC283475	-0.699497	5.73239	-1.89258	0.0920476	0.481854	-4.76591
154	146	0	A_33_P3256920	NM_058238	7477	WNT7B	wingless-type MMTV integration site family, member 7B	-0.699207	5.89209	-2.62668	0.0282518	0.343147	-3.65679
11	55	0	A_21_P0002916	ENST00000423643	NA	XLOC_003365		0.698335	5.91173	1.26465	0.238783	0.633558	-5.58915
97	78	0	A_21_P0014111	ENST00000490351	NA	LOC100506708		0.698038	6.09455	2.03945	0.0728672	0.448985	-4.55191
15	70	0	A_33_P3222218	NM_001142651	54492	NEURL1B	neuralized homolog 1B (Drosophila)	0.697177	6.79402	1.22831	0.251485	0.641576	-5.6306
43	31	0	A_21_P0008711	TCONS_00023592	NA	XLOC_011406		0.696222	5.89467	1.13452	0.286833	0.664904	-5.7336
276	162	0	A_33_P3395788	A_33_P3395788	NA			-0.696099	5.87797	-1.55296	0.155965	0.561532	-5.23351
199	127	0	A_23_P102017	NM_020711	57471	ERMN	ermin, ERM-like protein	-0.694814	5.74381	-1.50383	0.167986	0.574863	-5.29719
225	117	0	A_33_P3270147	A_33_P3270147	NA			-0.694404	6.60357	-1.4439	0.183753	0.589502	-5.37326
288	159	0	A_33_P3235142	A_33_P3235142	NA			-0.693893	5.53083	-1.99426	0.0783199	0.459272	-4.61837
249	59	0	A_21_P0004768	ENST00000423489	NA	XLOC_005796		-0.692357	5.70068	-1.71974	0.120713	0.521974	-5.00935
10	31	0	A_21_P0001099	ENST00000441033	NA	XLOC_000699		0.692047	5.94422	0.977492	0.354691	0.706623	-5.89223
352	108	0	A_21_P0004484	NR_024424	NA	LOC255167	uncharacterized LOC255167	0.691986	11.3028	2.23152	0.0535198	0.412204	-4.26453
255	49	0	A_33_P3215803	NM_001974	2015	EMR1	egf-like module containing, mucin-like, hormone receptor-like 1	-0.69177	7.2498	-1.31807	0.221088	0.619947	-5.52675
340	46	0	A_33_P3220911	ENST00000252593	684	BST2	bone marrow stromal cell antigen 2	-0.690325	9.26683	-7.66287	3.73832e-05	0.0192882	2.71405
99	77	0	A_21_P0004672	ENST00000424162	NA	XLOC_005413		0.689737	6.43742	1.24063	0.247119	0.639354	-5.61664
231	101	0	A_21_P0007674	TCONS_00020662	NA	XLOC_009964		-0.687435	5.88111	-1.45633	0.180382	0.585976	-5.35764
13	88	0	A_21_P0013126	ENST00000431001	NA	XLOC_l2_012432		0.687061	6.00536	1.18997	0.265479	0.650997	-5.6734
165	20	0	A_21_P0007644	TCONS_00020595	NA	XLOC_009912		-0.686447	6.08218	-1.80706	0.105325	0.500806	-4.88763
211	48	0	A_21_P0005387	DB341740	NA	XLOC_006121		-0.686443	5.72218	-2.08177	0.0680941	0.442101	-4.48925
223	83	0	A_23_P116640	NM_033180	79345	OR51B2	olfactory receptor, family 51, subfamily B, member 2	-0.68638	5.63482	-1.46291	0.178617	0.584777	-5.34933
115	101	0	A_21_P0006633	ENST00000431209	NA	XLOC_008341		0.686351	5.99567	2.27635	0.0497842	0.405841	-4.19648
84	3	0	A_21_P0009885	ENST00000425405	NA	XLOC_013665		0.686074	5.975	3.39514	0.0083198	0.237601	-2.46641
178	126	0	A_21_P0000871	NR_039979	NA	LOC100505659	uncharacterized LOC100505659	-0.685886	5.78109	-1.83396	0.100967	0.494872	-4.8496
183	52	0	A_21_P0000171	NM_001206866	NA	IL6R	interleukin 6 receptor	-0.685336	5.90317	-1.59305	0.146732	0.552437	-5.18072
203	75	0	A_21_P0012143	ENST00000437920	NA	XLOC_l2_008888		-0.684845	6.08411	-1.45197	0.181558	0.5871	-5.36313
178	86	0	A_33_P3286162	A_33_P3286162	NA			-0.684801	5.94678	-1.39587	0.197307	0.601743	-5.43288
225	101	0	A_23_P203558	NM_000518	3043	HBB	hemoglobin, beta	-0.683663	5.81238	-2.20869	0.0555258	0.416592	-4.29905
6	159	0	A_21_P0008843	TCONS_00024045	NA	XLOC_011403		0.682951	6.15602	1.57973	0.149744	0.554936	-5.19834
114	90	0	A_33_P3251193	ENST00000338061	23236	PLCB1	phospholipase C, beta 1 (phosphoinositide-specific)	0.682292	5.90906	1.36707	0.205842	0.608489	-5.46803
40	159	0	A_21_P0010006	TCONS_00028321	NA	XLOC_013660		0.682078	6.13978	1.2186	0.254969	0.644626	-5.64152
180	126	0	A_21_P0007513	TCONS_00020279	NA	XLOC_009624		-0.681768	5.90746	-1.26173	0.239785	0.634582	-5.59251
284	8	0	A_24_P331779	NM_001010892	345895	RSPH4A	radial spoke head 4 homolog A (Chlamydomonas)	-0.681631	6.29225	-2.60431	0.0292918	0.34732	-3.69154
79	118	0	A_23_P217277	NM_032539	84631	SLITRK2	SLIT and NTRK-like family, member 2	0.680881	5.8666	1.0608	0.317305	0.685827	-5.81031
275	91	0	A_33_P3311966	A_33_P3311966	NA			-0.680879	6.01023	-1.15962	0.277003	0.658652	-5.70661
286	155	0	A_21_P0004688	ENST00000447508	NA	XLOC_005470		-0.68051	5.94728	-1.5966	0.145939	0.551826	-5.17601
102	123	0	A_21_P0001696	TCONS_00002106	NA	XLOC_000318		0.680287	6.16799	1.28476	0.231988	0.628544	-5.56586
124	79	0	A_23_P131089	NM_198471	256949	KANK3	KN motif and ankyrin repeat domains 3	-0.678984	8.46161	-9.3837	7.61851e-06	0.0063005	4.09696
198	143	0	A_21_P0007210	TCONS_00019299	NA	XLOC_009126		-0.678695	6.11723	-1.82196	0.10289	0.497166	-4.86659
236	146	0	A_21_P0002304	TCONS_00003914	NA	XLOC_001719		-0.67809	5.79852	-1.20605	0.259534	0.647623	-5.65556
109	7	0	A_23_P105227	NM_001014811	10873	ME3	malic enzyme 3, NADP(+)-dependent, mitochondrial	0.677733	5.81754	1.21734	0.255426	0.64471	-5.64294
79	119	0	A_21_P0010204	ENST00000448579	NA	XLOC_014073		0.67757	5.96854	1.23332	0.249701	0.640592	-5.62493
278	124	0	A_23_P110957	NM_001452	2295	FOXF2	forkhead box F2	-0.67673	5.78746	-1.21466	0.256395	0.645281	-5.64594
221	94	0	A_33_P3297310	A_33_P3297310	NA			-0.676299	5.94662	-1.47175	0.176271	0.582072	-5.33814
256	130	0	A_23_P110957	NM_001452	2295	FOXF2	forkhead box F2	-0.676106	5.84373	-1.43492	0.186223	0.591924	-5.3845
267	122	0	A_33_P3388376	NM_001001417	414059	TBC1D3B	TBC1 domain family, member 3B	-0.675816	6.57402	-2.01674	0.0755599	0.453702	-4.58537
171	49	0	A_21_P0006163	TCONS_00016034	NA	XLOC_007429		-0.675524	5.71395	-1.3055	0.225148	0.623905	-5.54158
47	45	0	A_33_P3227258	XM_001131091	729706	LOC729706	putative TAF11-like protein ENSP00000332601-like	0.675488	6.09222	1.06863	0.313954	0.683014	-5.80235
8	87	0	A_33_P3321564	A_33_P3321564	NA			0.675134	6.05398	1.10614	0.298279	0.673677	-5.76359
268	155	0	A_23_P134433	NM_001427	2020	EN2	engrailed homeobox 2	0.674518	15.0628	8.26607	2.07746e-05	0.0138616	3.23625
20	69	0	A_21_P0014869	XR_132764	NA	LOC100652893	uncharacterized LOC100652893	0.674376	5.94768	1.89128	0.0922366	0.482224	-4.76777
254	131	0	A_21_P0005533	TCONS_00013979	NA	XLOC_006618		-0.673987	5.71983	-1.60688	0.143664	0.549223	-5.16234
14	75	0	A_21_P0004626	ENST00000433761	NA	XLOC_005132		0.67208	6.72125	1.08754	0.305975	0.678407	-5.78294
25	101	0	A_23_P112026	NM_002164	3620	IDO1	indoleamine 2,3-dioxygenase 1	0.672	6.45604	1.21699	0.255551	0.64478	-5.64333
125	108	0	A_21_P0004482	TCONS_00010605	NA	XLOC_004256		0.671945	5.75104	1.63343	0.137933	0.543484	-5.12682
88	91	0	A_33_P3309849	A_33_P3309849	NA			-0.671883	8.72808	-13.2824	4.43228e-07	0.001041	6.27573
135	79	0	A_19_P00328832	NR_026961	NA	LOC284837	uncharacterized LOC284837	0.670256	6.05488	1.29372	0.229012	0.626152	-5.55541
234	28	0	A_21_P0007828	TCONS_00021091	NA	XLOC_009696		-0.669551	5.7472	-1.29251	0.229413	0.626445	-5.55682
219	24	0	A_21_P0014845	XR_132716	NA	LOC100652916	uncharacterized LOC100652916	-0.669026	5.66682	-1.49349	0.170619	0.57715	-5.31045
222	53	0	A_23_P99080	NM_023920	50838	TAS2R13	taste receptor, type 2, member 13	-0.668947	5.98361	-1.96238	0.0823982	0.465873	-4.66492
224	94	0	A_33_P3293466	A_33_P3293466	NA			-0.668391	5.90318	-1.72409	0.119899	0.520465	-5.00335
208	61	0	A_21_P0012348	NM_145024	NA	CES5A	carboxylesterase 5A	-0.668296	6.21726	-2.81929	0.0207119	0.315553	-3.35702
328	75	0	A_23_P432352	NM_001017978	203413	CXorf61	chromosome X open reading frame 61	-0.667439	5.90089	-1.07216	0.312454	0.681817	-5.79875
259	4	0	A_21_P0011220	ENST00000413501	NA	XLOC_l2_003911		-0.666996	5.80158	-1.64141	0.136253	0.54169	-5.1161
146	83	0	A_23_P819	NM_005101	9636	ISG15	ISG15 ubiquitin-like modifier	-0.666021	10.3481	-9.82215	5.28038e-06	0.00476997	4.4007
134	17	0	A_33_P3233005	NM_017643	54799	MBTD1	mbt domain containing 1	0.665535	10.6207	6.54083	0.000123254	0.0421577	1.61881
280	130	0	A_33_P3245439	NM_001250	958	CD40	CD40 molecule, TNF receptor superfamily member 5	-0.664491	5.71345	-1.44415	0.183686	0.589435	-5.37295
329	4	0	A_33_P3244651	A_33_P3244651	NA			-0.664023	5.72562	-1.2329	0.24985	0.640826	-5.62541
302	13	0	A_21_P0000655	NR_036511	NA	LOC100129917	uncharacterized LOC100129917	0.664	8.62857	4.56455	0.00147681	0.13259	-0.767341
220	17	0	A_33_P3387561	NM_206818	126014	OSCAR	osteoclast associated, immunoglobulin-like receptor	0.663384	11.9549	7.73101	3.4921e-05	0.0189857	2.77524
65	77	0	A_23_P120281	NM_022336	10913	EDAR	ectodysplasin A receptor	0.662684	5.82385	1.08504	0.307019	0.678984	-5.78552
159	122	0	A_23_P119478	NM_005755	10148	EBI3	Epstein-Barr virus induced 3	-0.661776	5.95753	-2.06017	0.0704916	0.445585	-4.52129
61	17	0	A_33_P3258056	NM_001145028	342979	PALM3	paralemmin 3	0.661405	8.90778	4.68986	0.00124131	0.124167	-0.597351
19	5	0	A_23_P4899	NM_006179	4909	NTF4	neurotrophin 4	0.661364	7.75933	1.41924	0.190608	0.596108	-5.40403
89	7	0	A_21_P0006651	ENST00000456526	NA	XLOC_008386		0.661007	6.01416	1.04122	0.325811	0.690265	-5.83004
183	31	0	A_23_P98844	NM_182947	115557	ARHGEF25	Rho guanine nucleotide exchange factor (GEF) 25	0.660748	10.7896	2.56143	0.0313946	0.355117	-3.75807
268	122	0	A_21_P0003540	ENST00000508815	NA	XLOC_004173		-0.659985	5.70422	-1.51581	0.164982	0.571188	-5.28177
190	78	0	A_23_P51002	NM_176825	6819	SULT1C2	sulfotransferase family, cytosolic, 1C, member 2	-0.659465	5.79062	-1.36297	0.207082	0.609468	-5.47299
180	80	0	A_33_P3720733	AK128193	440390	FLJ46320	uncharacterized LOC440390	-0.659442	5.86902	-1.28234	0.232797	0.62883	-5.56868
6	44	0	A_33_P3418686	NM_005477	10021	HCN4	hyperpolarization activated cyclic nucleotide-gated potassium channel 4	0.659338	6.0849	1.26507	0.238639	0.633506	-5.58866
183	37	0	A_23_P309396	NM_178857	94137	RP1L1	retinitis pigmentosa 1-like 1	-0.659041	6.09466	-1.99756	0.0779085	0.458832	-4.61353
8	158	0	A_33_P3261953	A_33_P3261953	NA			0.659009	7.06265	2.0586	0.0706686	0.445585	-4.52361
326	75	0	A_33_P3262391	THC2712170	NA			-0.657865	5.86487	-1.37253	0.204201	0.607406	-5.46141
204	61	0	A_33_P3281176	A_33_P3281176	NA			-0.657789	6.3765	-1.95471	0.0834105	0.467636	-4.6761
40	108	0	A_21_P0014475	XR_109999	NA	LOC100506944	uncharacterized LOC100506944	0.657713	6.09996	1.07932	0.309425	0.680391	-5.79141
238	94	0	A_21_P0007343	TCONS_00019620	NA	XLOC_009419		-0.657441	5.73755	-1.25282	0.242858	0.636777	-5.60273
12	32	0	A_33_P3445679	NR_033877	400123	FLJ42392	uncharacterized LOC400123	0.65692	6.7505	1.24549	0.245412	0.638208	-5.61111
197	115	0	A_21_P0013108	THC2506834	NA	XLOC_l2_013153		-0.656872	5.77956	-1.83709	0.100471	0.494297	-4.84516
88	35	0	A_21_P0007142	ENST00000505409	NA	XLOC_009095		0.656602	5.8438	1.71204	0.122164	0.524009	-5.01995
175	69	0	A_33_P3351999	THC2642375	NA			-0.655886	6.05793	-1.67343	0.129691	0.533494	-5.07276
232	22	0	A_23_P126313	NM_018417	55811	ADCY10	adenylate cyclase 10 (soluble)	-0.655649	6.14389	-1.97189	0.0811608	0.463467	-4.65106
148	13	0	A_33_P3384552	XM_373809	388553	LOC388553	uncharacterized LOC388553	-0.655571	5.61296	-3.58532	0.00620271	0.219026	-2.17787
327	139	0	A_21_P0000325	NR_002970	NA	SNORA37	small nucleolar RNA, H/ACA box 37	0.655323	8.41405	1.16291	0.275733	0.658094	-5.70304
76	130	0	A_23_P39465	NM_004335	684	BST2	bone marrow stromal cell antigen 2	-0.655147	8.94117	-5.3155	0.00053951	0.0872292	0.213044
270	117	0	A_21_P0005456	TCONS_00013659	NA	XLOC_006321		-0.653498	6.14571	-1.28938	0.230451	0.627316	-5.56048
208	86	0	A_21_P0009926	TCONS_00028091	NA	XLOC_013436		0.652371	14.4283	15.2099	1.42331e-07	0.000417864	7.0186
234	134	0	A_33_P3288431	NM_152589	160419	C12orf50	chromosome 12 open reading frame 50	-0.652145	6.04489	-1.95384	0.0835254	0.467847	-4.67736
329	136	0	A_33_P3300117	A_33_P3300117	NA			0.65138	7.74983	1.51673	0.164753	0.570995	-5.28058
190	77	0	A_19_P00317242	XM_001716361	NA	LOC388210	apolipophorins-like	0.651015	11.0893	5.63483	0.000360222	0.0709771	0.602099
324	75	0	A_21_P0009606	TCONS_00026615	NA	XLOC_012664		-0.6498	5.85674	-1.29755	0.22775	0.625462	-5.55092
226	93	0	A_23_P137157	NM_002910	5973	RENBP	renin binding protein	-0.648885	7.23155	-2.11534	0.0645236	0.435826	-4.43925
198	77	0	A_32_P206497	ENST00000492679	NA			-0.64879	6.0436	-1.86949	0.0954678	0.487696	-4.799
263	68	0	A_33_P3275615	THC2786689	NA			-0.648758	5.64223	-1.59448	0.146412	0.552196	-5.17882
11	85	0	A_23_P148737	NM_004997	4608	MYBPH	myosin binding protein H	0.648113	6.50287	1.13301	0.287431	0.665298	-5.7352
197	4	0	A_21_P0002301	TCONS_00003909	NA	XLOC_001715		-0.647671	5.61958	-2.25292	0.0517031	0.409807	-4.23208
290	160	0	A_21_P0012234	XR_109675	NA	LOC100506471	uncharacterized LOC100506471	-0.647576	6.44313	-1.47456	0.175533	0.581252	-5.33458
72	67	0	A_21_P0009449	TCONS_00026271	NA	XLOC_012618		0.647164	5.98499	1.31386	0.222439	0.621342	-5.53172
280	4	0	A_23_P216966	NM_000962	5742	PTGS1	prostaglandin-endoperoxide synthase 1 (prostaglandin G/H synthase and cyclooxygenase)	-0.647103	6.9034	-2.44473	0.0379183	0.373871	-3.93851
270	3	0	A_21_P0006594	NR_001545	NA	TTTY15	testis-specific transcript, Y-linked 15 (non-protein coding)	-0.646756	6.04289	-2.20971	0.0554344	0.416446	-4.2975
109	108	0	A_33_P3314468	NM_001100170	10989	IMMT	inner membrane protein, mitochondrial	0.646729	10.3743	3.96373	0.00350602	0.18218	-1.61653
171	108	0	A_23_P139635	NM_001917	1610	DAO	D-amino-acid oxidase	0.646363	6.01166	1.14559	0.282462	0.661732	-5.72175
215	19	0	A_33_P3359253	ENST00000376655	10459	MAD2L2	MAD2 mitotic arrest deficient-like 2 (yeast)	-0.646167	6.18718	-1.37343	0.203931	0.607028	-5.46031
99	78	0	A_33_P3780123	AK057627	440952	FLJ33065	uncharacterized LOC440952	0.644479	6.19028	1.64277	0.135966	0.54135	-5.11425
237	135	0	A_21_P0006317	TCONS_00016473	NA	XLOC_007842		-0.643869	6.22411	-2.00488	0.0770042	0.456904	-4.60279
270	57	0	A_33_P3313411	NM_001172630	115703	ARHGAP33	Rho GTPase activating protein 33	0.643422	15.0945	16.9532	5.68861e-08	0.000222679	7.56009
322	94	0	A_33_P3283780	NM_015898	51341	ZBTB7A	zinc finger and BTB domain containing 7A	-0.643273	7.37724	-1.68075	0.128232	0.531661	-5.06279
339	152	0	A_33_P3400374	NM_001037335	85441	PRIC285	peroxisomal proliferator-activated receptor A interacting complex 285	-0.643155	12.1366	-5.9882	0.000234123	0.0575542	1.01367
148	102	0	A_21_P0009294	TCONS_00025553	NA	XLOC_012379		-0.641589	5.5494	-2.14528	0.0614929	0.429534	-4.39446
348	162	0	A_21_P0003810	TCONS_00008683	NA	XLOC_004199		-0.639554	6.21235	-1.50626	0.167373	0.573979	-5.29407
200	127	0	A_21_P0013141	ENST00000448991	NA	XLOC_l2_013015		-0.639538	5.90065	-1.60453	0.144181	0.549767	-5.16547
203	87	0	A_33_P3330944	A_33_P3330944	NA			-0.639368	5.79245	-1.43013	0.187555	0.592589	-5.39049
220	108	0	A_19_P00315826	EF413001	NA	XLOC_001148		-0.638742	6.46753	-1.5259	0.162488	0.569135	-5.26873
66	99	0	A_21_P0013987	XM_003119949	NA	LOC100509780	uncharacterized protein LOC100509780	0.637683	6.52067	1.05826	0.318399	0.686155	-5.81289
84	101	0	A_33_P3325102	CR604878	NA			0.636489	7.23216	2.0666	0.0697696	0.445144	-4.51176
315	52	0	A_23_P39881	NR_023391	100132708	CYP4F30P	cytochrome P450, family 4, subfamily F, polypeptide 30, pseudogene	-0.635651	5.65236	-1.38925	0.199241	0.602816	-5.441
346	162	0	A_23_P113111	NM_000044	367	AR	androgen receptor	-0.635225	6.12577	-1.51109	0.166161	0.57231	-5.28786
219	157	0	A_21_P0001810	TCONS_00002796	NA	XLOC_001315		-0.63517	5.74024	-1.32845	0.21778	0.61839	-5.51443
64	35	0	A_33_P3598363	AK055411	400662	LOC400662	uncharacterized LOC400662	0.6348	7.08773	1.26758	0.237784	0.633005	-5.58577
14	54	0	A_33_P3320563	NM_001080489	392465	GLOD5	glyoxalase domain containing 5	0.634616	5.94894	1.18792	0.266245	0.651137	-5.67567
222	108	0	A_21_P0011557	TCONS_l2_00010999	NA	XLOC_l2_005915		-0.634157	5.85379	-1.78032	0.109832	0.507196	-4.92519
272	91	0	A_33_P3263317	AK128421	NA			-0.633679	6.53703	-1.17967	0.269346	0.653439	-5.68474
103	124	0	A_21_P0001926	ENST00000443811	NA	XLOC_001707		0.63323	6.01334	1.57614	0.150566	0.555779	-5.20308
197	143	0	A_33_P3268875	AF370394	NA			-0.633083	5.73391	-2.19138	0.0570963	0.420614	-4.32517
122	108	0	A_19_P00320740	AK126481	NA	XLOC_004598		0.632753	6.04747	1.11	0.296701	0.6727	-5.75954
205	45	0	A_33_P3405038	NR_024564	100130264	LOC100130264	uncharacterized LOC100130264	-0.632355	7.8016	-4.87066	0.000970031	0.115167	-0.356595
230	117	0	A_23_P121253	NM_003810	8743	TNFSF10	tumor necrosis factor (ligand) superfamily, member 10	-0.632185	6.19	-1.40218	0.19548	0.600376	-5.42513
20	6	0	A_21_P0006415	ENST00000449605	NA	XLOC_007942		0.631646	6.30247	1.36148	0.207534	0.609806	-5.4748
203	83	0	A_21_P0001927	ENST00000427615	NA	XLOC_001707		-0.631446	5.68723	-1.43166	0.187128	0.592429	-5.38857
114	11	0	A_21_P0005471	TCONS_00013698	NA	XLOC_006356		0.631376	5.80875	1.42424	0.1892	0.594124	-5.39781
230	155	0	A_21_P0001900	ENST00000419650	NA	XLOC_001620		0.631202	9.74039	3.69744	0.00522773	0.207684	-2.00966
129	46	0	A_21_P0004057	ENST00000502809	NA	XLOC_004534		-0.631097	5.7324	-2.09854	0.0662873	0.43906	-4.4643
251	144	0	A_21_P0008127	THC2670501	NA	XLOC_010525		-0.630326	6.07639	-1.29924	0.227194	0.625085	-5.54894
266	125	0	A_32_P189413	NM_001048252	613212	CTXN3	cortexin 3	-0.629536	5.64128	-1.63471	0.137663	0.543144	-5.12511
340	60	0	A_19_P00810465	NM_002235	NA	KCNA6	potassium voltage-gated channel, shaker-related subfamily, member 6	-0.629097	6.83822	-10.4079	3.30489e-06	0.00359357	4.77981
74	140	0	A_33_P3374640	NM_001101340	199800	C19orf76	chromosome 19 open reading frame 76	0.628256	6.00414	1.54276	0.158398	0.563743	-5.24683
175	21	0	A_33_P3349045	NM_001008699	3566	IL4R	interleukin 4 receptor	-0.628239	5.83658	-1.40339	0.195129	0.600026	-5.42363
15	62	0	A_21_P0012541	XR_109995	NA	LOC285286	uncharacterized LOC285286	0.628194	6.06904	0.959337	0.363258	0.71205	-5.90938
115	121	0	A_33_P3353991	ENST00000317359	NA			0.627509	6.03414	1.19015	0.265412	0.650942	-5.67321
214	56	0	A_23_P35092	NM_153758	29949	IL19	interleukin 19	-0.627175	5.87704	-1.34578	0.212354	0.613953	-5.49372
192	124	0	A_21_P0001627	TCONS_00001829	NA	XLOC_001212		-0.6268	5.71141	-1.43081	0.187364	0.592472	-5.38963
182	51	0	A_33_P3390918	NM_001007122	123722	FSD2	fibronectin type III and SPRY domain containing 2	-0.626222	5.8341	-1.69683	0.12508	0.527383	-5.04082
83	101	0	A_21_P0013801	THC2552745	NA	XLOC_l2_015641		0.625814	6.13762	1.17524	0.271023	0.654798	-5.6896
175	65	0	A_33_P3270252	NM_001004450	347169	OR1B1	olfactory receptor, family 1, subfamily B, member 1	-0.625632	5.7429	-2.08794	0.0674234	0.441331	-4.48007
101	104	0	A_21_P0009592	BP432385	NA	XLOC_012898		0.625391	5.82864	1.17145	0.272464	0.656006	-5.69374
89	44	0	A_33_P3468614	AK057304	439944	FLJ32742	uncharacterized locus FLJ32742	0.6253	5.84989	1.32792	0.217949	0.618437	-5.51506
178	96	0	A_21_P0005537	TCONS_00013994	NA	XLOC_006638		-0.62475	6.16474	-1.44437	0.183626	0.589408	-5.37268
183	54	0	A_23_P30567	NM_001882	1393	CRHBP	corticotropin releasing hormone binding protein	-0.624648	5.65229	-1.56131	0.154001	0.560022	-5.22258
172	75	0	A_33_P3405606	NR_024393	727677	LOC727677	uncharacterized LOC727677	0.62448	5.99889	1.29968	0.22705	0.625085	-5.54842
19	162	0	A_33_P3215198	BC141802	129607	CMPK2	cytidine monophosphate (UMP-CMP) kinase 2, mitochondrial	0.624022	6.03739	1.79705	0.106993	0.503872	-4.90172
199	115	0	A_21_P0005386	TCONS_00013467	NA	XLOC_006118		-0.623396	5.6846	-1.85713	0.0973478	0.490052	-4.81664
199	39	0	A_24_P15640	BC137009	NA			0.623248	12.3711	8.55563	1.58585e-05	0.011263	3.47196
171	147	0	A_33_P3420545	NM_014379	27012	KCNV1	potassium channel, subfamily V, member 1	-0.622671	5.80687	-1.61726	0.141399	0.547398	-5.1485
256	70	0	A_21_P0002251	TCONS_00003756	NA	XLOC_001558		-0.622063	5.85836	-1.27891	0.233947	0.629866	-5.57266
214	93	0	A_21_P0013413	ENST00000454003	NA	XLOC_l2_013730		-0.621034	5.7829	-1.58196	0.149237	0.554538	-5.1954
40	109	0	A_33_P3306342	NM_001001922	390075	OR52N5	olfactory receptor, family 52, subfamily N, member 5	0.620515	6.70915	1.02807	0.331616	0.693281	-5.84312
268	68	0	A_23_P214821	NM_001955	1906	EDN1	endothelin 1	-0.619855	7.1542	-1.46334	0.178501	0.584626	-5.34878
356	133	0	A_33_P3220352	NM_001103176	285888	CNPY1	canopy 1 homolog (zebrafish)	-0.619751	6.02403	-1.88773	0.0927564	0.483306	-4.77287
9	143	0	A_21_P0005668	ENST00000517573	NA	XLOC_006734		0.619631	5.97673	1.66791	0.130802	0.534723	-5.08026
180	96	0	A_21_P0004066	ENST00000446720	NA	XLOC_004568		-0.618764	5.7192	-1.37174	0.204435	0.607662	-5.46236
159	108	0	A_33_P3338440	ENST00000323433	92017	SNX29	sorting nexin 29	-0.618762	6.265	-2.23268	0.053419	0.412158	-4.26276
201	88	0	A_23_P122144	NM_152404	133688	UGT3A1	UDP glycosyltransferase 3 family, polypeptide A1	-0.618657	6.44971	-1.40131	0.195729	0.600539	-5.42619
276	6	0	A_21_P0010025	TCONS_00028348	NA	XLOC_013697		-0.618193	5.73648	-1.61978	0.140853	0.54677	-5.14512
279	3	0	A_21_P0004140	XM_001714293	NA	LOC389300	uncharacterized LOC389300	-0.61734	6.935	-1.80396	0.105839	0.501754	-4.89199
248	56	0	A_23_P123228	NM_000111	1811	SLC26A3	solute carrier family 26, member 3	-0.61714	5.80173	-1.24539	0.245447	0.638208	-5.61122
155	147	0	A_33_P3261463	AL713743	440556	FLJ42875	uncharacterized LOC440556	-0.617105	5.64277	-3.85881	0.00409895	0.192906	-1.77029
195	113	0	A_23_P122508	NM_080870	135656	DPCR1	diffuse panbronchiolitis critical region 1	-0.617051	6.12827	-1.60295	0.144529	0.550332	-5.16757
84	126	0	A_19_P00319369	NR_027104	NA	LOC285401	uncharacterized LOC285401	0.617042	5.8347	1.41185	0.192704	0.597848	-5.41318
135	38	0	A_21_P0010110	BC047055	NA	XLOC_013658		0.616544	5.8764	1.76607	0.112306	0.510947	-4.94511
251	46	0	A_21_P0008949	TCONS_00024420	NA	XLOC_011728		-0.615859	5.82312	-1.45412	0.180975	0.586589	-5.36042
240	145	0	A_23_P1173	NM_004132	3026	HABP2	hyaluronan binding protein 2	-0.615535	5.83466	-1.91617	0.0886727	0.476928	-4.73194
173	36	0	A_33_P3393801	NM_005764	10158	PDZK1IP1	PDZK1 interacting protein 1	-0.614398	5.96266	-1.91028	0.0895047	0.478175	-4.74044
140	103	0	A_23_P200579	NM_007352	23436	CELA3B	chymotrypsin-like elastase family, member 3B	-0.614207	5.90122	-1.86487	0.0961674	0.488351	-4.80561
86	37	0	A_23_P31161	NM_001869	1358	CPA2	carboxypeptidase A2 (pancreatic)	0.614176	6.00903	1.24699	0.244888	0.63783	-5.6094
143	58	0	A_21_P0010172	ENST00000435738	NA	XLOC_013989		-0.614174	5.72907	-2.04744	0.0719424	0.447061	-4.54012
66	59	0	A_23_P68155	NM_022168	64135	IFIH1	interferon induced with helicase C domain 1	-0.61383	6.86209	-12.4494	7.59491e-07	0.0013439	5.89663
217	109	0	A_23_P119478	NM_005755	10148	EBI3	Epstein-Barr virus induced 3	-0.613039	5.98454	-1.65338	0.133764	0.538759	-5.09993
146	87	0	A_33_P3374678	NM_004262	9407	TMPRSS11D	transmembrane protease, serine 11D	-0.61294	5.75013	-2.18079	0.0580781	0.421819	-4.34112
166	96	0	A_33_P3378056	ENST00000478375	7020	TFAP2A	transcription factor AP-2 alpha (activating enhancer binding protein 2 alpha)	-0.612179	5.62	-2.24701	0.0521983	0.410406	-4.24104
18	161	0	A_23_P32629	NM_153456	266722	HS6ST3	heparan sulfate 6-O-sulfotransferase 3	0.612057	6.20912	1.29729	0.227835	0.625543	-5.55122
36	100	0	A_21_P0000798	NR_038427	NA	LOC100505624	uncharacterized LOC100505624	0.611619	5.87209	1.12104	0.292225	0.669262	-5.74791
164	5	0	A_23_P115932	NM_181840	338567	KCNK18	potassium channel, subfamily K, member 18	-0.610764	5.80576	-1.85093	0.098304	0.49116	-4.82548
168	67	0	A_32_P19539	NM_001199679	148534	TMEM56	transmembrane protein 56	-0.61041	6.57378	-2.19135	0.0570988	0.420614	-4.32521
37	160	0	A_33_P3283262	NM_001105662	391627	USP17	ubiquitin specific peptidase 17	0.609724	5.95139	1.10994	0.296725	0.672702	-5.7596
285	7	0	A_21_P0002791	ENST00000498413	NA	XLOC_002904		-0.608833	5.9681	-2.33398	0.0453578	0.393459	-4.10858
317	160	0	A_24_P274270	NM_139266	6772	STAT1	signal transducer and activator of transcription 1, 91kDa	-0.60847	8.89918	-5.89044	0.000263328	0.0603228	0.901763
12	43	0	A_33_P3320822	M62378	NA			0.607676	5.77523	1.07298	0.312104	0.681589	-5.79791
164	133	0	A_21_P0007466	ENST00000526385	NA	XLOC_009530		-0.607413	5.70598	-2.21652	0.0548298	0.414717	-4.28722
314	51	0	A_33_P3311668	AA489744	NA			-0.607234	5.93693	-1.11769	0.293578	0.670219	-5.75145
297	132	0	A_23_P103070	NM_003405	7533	YWHAH	tyrosine 3-monooxygenase/tryptophan 5-monooxygenase activation protein, eta polypeptide	0.607174	11.8978	1.39519	0.197507	0.601868	-5.43372
325	61	0	A_33_P3242355	BC027847	NA			0.607016	10.1371	2.98707	0.0158315	0.294824	-3.09589
130	39	0	A_33_P3547141	AF130053	100131298	LOC100131298	PRO1095	0.60691	5.95217	1.62993	0.138677	0.544666	-5.13153
126	16	0	A_24_P231057	NM_148894	259282	BOD1L	biorientation of chromosomes in cell division 1-like	0.606787	9.835	3.77543	0.00464584	0.19969	-1.89354
168	111	0	A_33_P3216746	NM_015236	23284	LPHN3	latrophilin 3	-0.606546	6.02097	-1.41891	0.190702	0.596124	-5.40444
18	67	0	A_33_P3217867	A_33_P3217867	NA			0.60651	5.93979	1.36668	0.20596	0.608716	-5.46851
35	100	0	A_33_P3270237	XR_108311	100506128	LOC100506128	uncharacterized LOC100506128	0.605923	5.89254	1.1911	0.265058	0.650712	-5.67216
333	5	0	A_21_P0006474	TCONS_00017112	NA	XLOC_007909		-0.60545	6.92767	-1.21102	0.25772	0.646215	-5.65002
213	41	0	A_33_P3442301	BG250912	100271836	LOC100271836	smg-1 homolog, phosphatidylinositol 3-kinase-related kinase (C. elegans) pseudogene	0.605331	5.7025	1.97793	0.0803844	0.462172	-4.64225
284	19	0	A_24_P323754	XR_109960	100131510	LOC100131510	uncharacterized LOC100131510	-0.604861	6.16145	-1.68579	0.127238	0.530328	-5.05592
69	2	0	A_24_P289299	NM_182947	115557	ARHGEF25	Rho guanine nucleotide exchange factor (GEF) 25	0.604551	8.25714	4.21477	0.00242759	0.160625	-1.25502
323	74	0	A_21_P0004483	TCONS_00010608	NA	XLOC_004260		-0.604324	5.7992	-1.2865	0.231406	0.62816	-5.56383
335	41	0	A_33_P3279620	AK094832	NA			0.603241	9.13818	3.51796	0.00687915	0.226058	-2.27963
59	163	0	A_33_P3266614	A_33_P3266614	NA			0.602505	10.6054	2.03256	0.0736745	0.450789	-4.56208
130	68	0	A_21_P0013762	TCONS_l2_00030196	NA	XLOC_l2_015512		0.602115	5.84066	1.33498	0.215721	0.616813	-5.50664
161	135	0	A_19_P00318152	NR_003239	NA	SNHG11		0.601954	13.7285	4.09608	0.00288514	0.170429	-1.42478
193	30	0	A_33_P3263651	NM_032108	10501	SEMA6B	sema domain, transmembrane domain (TM), and cytoplasmic domain, (semaphorin) 6B	-0.601113	6.35567	-1.35797	0.208602	0.610532	-5.47903
307	136	0	A_23_P109171	NM_001195	631	BFSP1	beaded filament structural protein 1, filensin	0.601064	7.98294	1.62582	0.139555	0.545409	-5.13704
163	5	0	A_21_P0004581	TCONS_00011087	NA	XLOC_005081		-0.600823	6.07868	-1.78722	0.108653	0.505449	-4.91553
248	59	0	A_21_P0001094	ENST00000425194	NA	XLOC_000684		-0.599688	5.95738	-1.56782	0.152484	0.558113	-5.21403
158	106	0	A_24_P58501	NM_001004195	26682	OR4F4	olfactory receptor, family 4, subfamily F, member 4	-0.599034	5.99492	-2.7259	0.0240716	0.327862	-3.50246
121	109	0	A_23_P110957	NM_001452	2295	FOXF2	forkhead box F2	0.598913	5.92073	1.42581	0.188761	0.593714	-5.39586
51	46	0	A_33_P3353520	NM_001195135	646862	LOC646862	uncharacterized LOC646862	0.598893	7.09982	1.78986	0.108204	0.50502	-4.91182
179	55	0	A_33_P3348270	ENST00000454561	NA			-0.596606	5.57113	-2.25736	0.0513344	0.40926	-4.22535
96	54	0	A_33_P3385681	AK128224	100130768	LOC100130768	uncharacterized LOC100130768	0.596585	7.17761	1.28634	0.231462	0.62816	-5.56403
293	134	0	A_32_P389770	NR_040078	283165	KIRREL3-AS3	KIRREL3 antisense RNA 3 (non-protein coding)	-0.596072	6.17357	-1.47665	0.174984	0.58063	-5.33192
102	104	0	A_24_P82106	NM_004995	4323	MMP14	matrix metallopeptidase 14 (membrane-inserted)	0.595342	6.11609	1.23161	0.250308	0.640967	-5.62687
247	46	0	A_21_P0011967	NM_003014	NA	SFRP4	secreted frizzled-related protein 4	-0.595341	7.05321	-1.67768	0.128842	0.532652	-5.06697
136	124	0	A_23_P101374	NM_030622	29785	CYP2S1	cytochrome P450, family 2, subfamily S, polypeptide 1	0.595288	5.99746	1.39518	0.197509	0.601868	-5.43373
282	8	0	A_23_P103765	NM_002001	2205	FCER1A	Fc fragment of IgE, high affinity I, receptor for; alpha polypeptide	-0.595013	5.72468	-1.47751	0.174757	0.580401	-5.33082
197	2	0	A_33_P3291459	NR_037169	100507547	LOC100507547	uncharacterized LOC100507547	0.594803	14.2524	1.88787	0.0927353	0.483281	-4.77267
63	1	0	A_21_P0005187	TCONS_00012836	NA	XLOC_005944		0.594169	10.2022	1.74085	0.116813	0.516866	-4.98018
293	156	0	A_23_P117896	NM_052955	116179	TGM7	transglutaminase 7	-0.593838	6.06004	-1.64677	0.135132	0.54051	-5.10886
37	13	0	A_33_P3410232	NR_024541	79136	LY6G6E	lymphocyte antigen 6 complex, locus G6E (pseudogene)	0.593748	6.01788	1.03246	0.329668	0.692305	-5.83876
323	34	0	A_33_P3387145	NM_031892	30011	SH3KBP1	SH3-domain kinase binding protein 1	0.592819	8.06804	4.15844	0.00263427	0.1651	-1.33533
166	84	0	A_33_P3510508	A_33_P3510508	NA			-0.592738	6.01114	-1.58362	0.14886	0.554349	-5.19321
269	87	0	A_33_P3710442	AK021772	79904	FLJ11710	uncharacterized protein FLJ11710	-0.592259	9.20474	-4.6318	0.00134498	0.128462	-0.675803
222	115	0	A_21_P0003199	TCONS_00006729	NA	XLOC_003364		-0.59125	5.86004	-1.08941	0.305193	0.678044	-5.781
47	31	0	A_23_P155236	NM_033049	56667	MUC13	mucin 13, cell surface associated	0.59112	5.75926	0.901827	0.391403	0.730211	-5.96197
271	45	0	A_23_P32404	NM_002201	3669	ISG20	interferon stimulated exonuclease gene 20kDa	-0.590666	11.7431	-9.89398	4.97919e-06	0.00464069	4.44878
95	147	0	A_33_P3245290	NR_002817	375719	AQP7P1	aquaporin 7 pseudogene 1	0.590062	6.12562	1.38816	0.199562	0.603099	-5.44234
101	77	0	A_33_P3403714	NR_027257	400710	FLJ26850	FLJ26850 protein	0.589213	6.37322	1.11137	0.296141	0.672193	-5.7581
71	119	0	A_21_P0001078	BG215014	NA	XLOC_000624		0.589212	5.99819	1.04951	0.322187	0.688525	-5.82172
102	20	0	A_21_P0002696	TCONS_00005379	NA	XLOC_002560		0.589171	5.96698	1.75278	0.11466	0.513727	-4.96361
290	8	0	A_21_P0004523	AI674115	NA	XLOC_004497		-0.588702	5.61941	-1.29548	0.228432	0.625907	-5.55335
202	77	0	A_21_P0005209	ENST00000436915	NA	XLOC_005979		-0.587954	6.36768	-1.65379	0.13368	0.538691	-5.09939
113	121	0	A_21_P0012714	NR_033931	NA	LOC152742	uncharacterized LOC152742	0.58767	6.00608	1.30847	0.224185	0.623053	-5.53809
18	70	0	A_23_P113393	NM_017413	8862	APLN	apelin	0.587284	7.32432	1.7653	0.112442	0.511001	-4.94619
157	107	0	A_33_P3344209	NM_024786	79844	ZDHHC11	zinc finger, DHHC-type containing 11	-0.585999	6.27098	-1.7919	0.107859	0.504669	-4.90896
123	16	0	A_23_P216434	ENST00000375540	1842	ECM2	extracellular matrix protein 2, female organ and adipocyte specific	-0.585835	5.96724	-2.21194	0.0552361	0.415975	-4.29415
258	69	0	A_23_P111978	NM_016601	51305	KCNK9	potassium channel, subfamily K, member 9	-0.585483	6.53462	-1.32394	0.219211	0.619311	-5.51978
295	130	0	A_23_P25873	NM_007086	11169	WDHD1	WD repeat and HMG-box DNA binding protein 1	0.585367	11.3276	1.6483	0.134816	0.53997	-5.10681
159	27	0	A_33_P3324750	ENST00000382313	NA			0.585301	5.8183	1.41324	0.192309	0.597564	-5.41146
270	91	0	A_33_P3329632	AK126788	644767	FLJ44838	uncharacterized LOC644767	-0.585063	5.64892	-1.2565	0.241583	0.635736	-5.59851
169	48	0	A_33_P3305325	A_33_P3305325	NA			-0.5849	6.11563	-1.85536	0.0976203	0.49049	-4.81917
311	69	0	A_24_P274270	NM_139266	6772	STAT1	signal transducer and activator of transcription 1, 91kDa	-0.584856	9.23523	-5.53221	0.000409525	0.0742844	0.478862
101	123	0	A_21_P0003443	ENST00000514966	NA	XLOC_003838		0.584498	6.13577	1.1186	0.293211	0.669875	-5.7505
105	85	0	A_32_P210872	NM_001037558	641654	HEPN1	hepatocellular carcinoma, down-regulated 1	0.584452	5.85526	1.41714	0.191202	0.596835	-5.40663
90	59	0	A_21_P0003416	ENST00000505586	NA	XLOC_003733		0.584237	5.78858	0.981696	0.352728	0.705694	-5.88822
247	20	0	A_23_P142878	NM_032827	84913	ATOH8	atonal homolog 8 (Drosophila)	-0.583809	7.67833	-1.87218	0.0950646	0.486749	-4.79516
17	67	0	A_33_P3257574	AK125006	NA			0.583567	5.89656	1.23564	0.248877	0.640193	-5.6223
126	56	0	A_21_P0003134	TCONS_00006549	NA	XLOC_003172		0.583553	5.94749	1.20796	0.258835	0.646873	-5.65344
35	22	0	A_33_P3370305	NM_145041	113277	TMEM106A	transmembrane protein 106A	0.583551	5.86154	0.98364	0.351823	0.704889	-5.88636
107	7	0	A_23_P52676	NM_053054	117144	CATSPER1	cation channel, sperm associated 1	0.583491	6.39588	1.30218	0.226233	0.624724	-5.54549
53	102	0	A_23_P114903	NM_002155	3310	HSPA6	heat shock 70kDa protein 6 (HSP70B')	-0.583419	6.26226	-11.6572	1.30755e-06	0.00194844	5.49754
77	150	0	A_33_P3276386	A_33_P3276386	NA			0.583016	5.88122	1.29414	0.228875	0.626082	-5.55492
265	122	0	A_24_P339126	NM_144957	10942	PRSS21	protease, serine, 21 (testisin)	-0.58287	6.26134	-1.4311	0.187284	0.592429	-5.38927
244	110	0	A_21_P0014288	XR_109155	NA	ANKRD10-IT1	ANKRD10 intronic transcript 1 (non-protein coding)	-0.582117	8.13005	-10.0924	4.24132e-06	0.00417325	4.57929
79	4	0	A_23_P115161	NM_002036	2532	DARC	Duffy blood group, chemokine receptor	0.581735	6.19958	1.64152	0.136228	0.54169	-5.11594
104	27	0	A_21_P0004007	ENST00000515077	NA	XLOC_004410		0.581668	6.00104	1.27199	0.236286	0.631588	-5.58068
178	21	0	A_21_P0002633	TCONS_00005038	NA	XLOC_001910		-0.581653	6.12851	-2.19135	0.0570996	0.420614	-4.32522
328	4	0	A_33_P3814473	BF248073	7115	TMSB4XP1	thymosin beta 4, X-linked pseudogene 1	-0.581641	5.75607	-1.24155	0.246792	0.639249	-5.61559
335	43	0	A_23_P205697	NM_001933	1743	DLST	dihydrolipoamide S-succinyltransferase (E2 component of 2-oxo-glutarate complex)	0.581118	13.1699	2.69315	0.025377	0.331346	-3.55343
43	141	0	A_21_P0003893	TCONS_00009040	NA	XLOC_003932		0.580684	5.92619	1.09775	0.301729	0.675748	-5.77234
241	95	0	A_33_P3228427	BX103560	NA			-0.580479	5.65628	-1.37662	0.202976	0.60606	-5.45642
140	54	0	A_24_P274270	NM_139266	6772	STAT1	signal transducer and activator of transcription 1, 91kDa	-0.580304	9.38828	-6.11589	0.000201178	0.0546878	1.15759
287	8	0	A_32_P174365	NM_015265	23314	SATB2	SATB homeobox 2	-0.580199	5.80467	-1.41431	0.192004	0.59746	-5.41014
86	109	0	A_23_P343398	NM_001838	1236	CCR7	chemokine (C-C motif) receptor 7	0.580109	6.53487	1.26604	0.238307	0.633195	-5.58754
189	30	0	A_21_P0006826	TCONS_00018107	NA	XLOC_008370		-0.580005	6.01848	-1.49872	0.169283	0.575994	-5.30375
183	33	0	A_24_P925635	NR_024271	641977	SEPT7P2	septin 7 pseudogene 2	-0.57998	7.10356	-2.83771	0.020108	0.311689	-3.32833
165	55	0	A_33_P3281995	AK129682	100507236	LOC100507236	uncharacterized protein LOC100507236	-0.5797	5.79479	-1.56126	0.154014	0.560022	-5.22265
271	91	0	A_32_P183598	THC2524341	NA			-0.578782	6.12661	-1.10214	0.299921	0.674962	-5.76777
99	81	0	A_21_P0001119	ENST00000453837	NA	XLOC_000772		0.578762	6.15941	1.25228	0.243047	0.636956	-5.60335
6	158	0	A_21_P0009187	ENST00000456090	NA	XLOC_012408		0.578492	7.64381	2.33032	0.0456273	0.394186	-4.11418
84	93	0	A_21_P0011734	XR_109588	NA	LOC100505851	uncharacterized LOC100505851	0.578383	5.88666	1.05117	0.321468	0.68798	-5.82005
13	76	0	A_23_P258194	NM_001018060	150209	AIFM3	apoptosis-inducing factor, mitochondrion-associated, 3	0.578075	7.59212	1.70563	0.123386	0.525338	-5.02876
184	51	0	A_33_P3376518	ENST00000415156	NA			-0.577999	5.65363	-1.61636	0.141593	0.547725	-5.14969
205	150	0	A_24_P274270	NM_139266	6772	STAT1	signal transducer and activator of transcription 1, 91kDa	-0.577961	8.9333	-6.51026	0.000127582	0.0428071	1.58652
214	22	0	A_33_P3805819	XR_110455	100505890	LOC100505890	uncharacterized LOC100505890	-0.57782	5.91627	-1.25708	0.241384	0.635736	-5.59785
91	59	0	A_24_P148499	NM_033358	841	CASP8	caspase 8, apoptosis-related cysteine peptidase	0.577648	5.77714	1.12396	0.291048	0.668211	-5.74482
166	65	0	A_23_P116640	NM_033180	79345	OR51B2	olfactory receptor, family 51, subfamily B, member 2	-0.576842	5.69178	-1.32559	0.218686	0.618982	-5.51783
81	118	0	A_21_P0000070	NM_001167931	NA	IL1RAP	interleukin 1 receptor accessory protein	0.576562	5.84187	1.1234	0.291275	0.668475	-5.74542
13	77	0	A_23_P94275	NM_014420	27121	DKK4	dickkopf homolog 4 (Xenopus laevis)	0.576272	6.35313	0.844769	0.420836	0.747989	-6.01149
138	131	0	A_33_P3413104	A_33_P3413104	NA			-0.575797	6.50841	-11.3619	1.61467e-06	0.00210686	5.33819
213	70	0	A_19_P00315863	ENST00000417922	NA	XLOC_l2_008434		-0.575675	6.35582	-1.45556	0.180589	0.586118	-5.35861
337	137	0	A_33_P3274009	AK124556	100132966	LOC100132966	uncharacterized LOC100132966	0.575066	12.5465	3.9134	0.00377818	0.186266	-1.69009
129	65	0	A_33_P3279009	NM_018942	3166	HMX1	H6 family homeobox 1	0.574934	14.3589	9.99746	4.57814e-06	0.0044068	4.51726
255	3	0	A_21_P0013415	ENST00000418442	NA	XLOC_l2_013734		-0.574749	6.03722	-1.78845	0.108444	0.505206	-4.9138
97	48	0	A_24_P77904	NM_018951	3206	HOXA10	homeobox A10	0.574336	5.84108	1.16958	0.273177	0.656187	-5.69578
70	132	0	A_23_P87727	NM_033328	93661	CAPZA3	capping protein (actin filament) muscle Z-line, alpha 3	0.573437	5.87488	1.11635	0.29412	0.67057	-5.75287
154	61	0	A_23_P117387	NM_054024	117153	MIA2	melanoma inhibitory activity 2	0.573275	6.10972	1.36988	0.204996	0.607826	-5.46463
8	44	0	A_21_P0003690	TCONS_00008359	NA	XLOC_003809		0.573188	6.03184	1.3629	0.207103	0.609468	-5.47308
276	7	0	A_21_P0008943	TCONS_00024412	NA	XLOC_011724		-0.573177	5.67982	-1.5014	0.168602	0.57533	-5.30031
35	110	0	A_23_P365738	NM_015193	23237	ARC	activity-regulated cytoskeleton-associated protein	-0.572939	11.5124	-9.92668	4.8484e-06	0.00459167	4.47053
30	164	0	A_21_P0004330	TCONS_00010166	NA	XLOC_004629		0.572797	6.18556	1.21318	0.256933	0.645709	-5.6476
101	14	0	A_19_P00322321	THC2558187	NA	XLOC_l2_013314		0.572598	5.94202	1.25728	0.241314	0.635736	-5.59762
169	68	0	A_33_P3215317	ENST00000370684	5567	PRKACB	protein kinase, cAMP-dependent, catalytic, beta	-0.572357	6.63404	-1.94039	0.0853298	0.470443	-4.69689
39	109	0	A_33_P3287716	AK128048	100129292	LOC100129292	uncharacterized LOC100129292	0.572135	6.73111	1.13656	0.286021	0.664109	-5.73142
230	100	0	A_21_P0014142	XR_108573	NA	LOC100506495	uncharacterized LOC100506495	-0.571876	5.56845	-1.18512	0.267295	0.651877	-5.67875
364	110	0	A_24_P274270	NM_139266	6772	STAT1	signal transducer and activator of transcription 1, 91kDa	-0.57184	9.10389	-7.64382	3.81054e-05	0.0192882	2.69683
361	17	0	A_33_P3394075	NM_006912	6016	RIT1	Ras-like without CAAX 1	-0.570671	9.37786	-2.00806	0.076614	0.456014	-4.59812
82	13	0	A_21_P0012600	TCONS_l2_00020647	NA	XLOC_l2_010751		0.570068	5.90097	1.10915	0.297049	0.672907	-5.76044
166	30	0	A_33_P3307910	ENST00000409490	NA			-0.569417	6.34231	-1.50898	0.16669	0.57296	-5.29057
280	5	0	A_19_P00810229	TCONS_00004551	NA	XLOC_002455		-0.56934	5.98375	-1.15388	0.279225	0.659929	-5.71282
44	30	0	A_21_P0003052	TCONS_00006291	NA	XLOC_002897		0.568535	5.923	1.01533	0.337319	0.696795	-5.85567
254	59	0	A_23_P123424	NM_000749	1142	CHRNB3	cholinergic receptor, nicotinic, beta 3	-0.568358	6.61511	-1.22896	0.251252	0.641576	-5.62986
190	108	0	A_21_P0009072	TCONS_00024742	NA	XLOC_012021		-0.568298	5.95504	-1.63981	0.136587	0.541928	-5.11824
15	160	0	A_21_P0003844	ENST00000504132	NA	XLOC_003636		0.568098	5.92145	1.49306	0.17073	0.577171	-5.311
268	139	0	A_32_P440667	NM_001128933	171024	SYNPO2	synaptopodin 2	-0.568076	7.65867	-2.62856	0.028166	0.342817	-3.65386
49	46	0	A_21_P0001791	NR_038844	NA	LOC644838	uncharacterized LOC644838	0.567938	5.87205	1.05754	0.318713	0.686221	-5.81363
82	126	0	A_32_P485915	NM_178527	284525	SLC9A11	solute carrier family 9, member 11	0.567643	5.9291	1.16828	0.273672	0.656691	-5.69719
267	140	0	A_33_P3233608	NM_145664	100133171	SPANXB2	SPANX family, member B2	-0.567582	6.01414	-2.2905	0.0486595	0.401846	-4.17495
70	35	0	A_23_P103256	NM_021023	10878	CFHR3	complement factor H-related 3	0.567459	5.73731	1.06155	0.316986	0.685399	-5.80956
9	123	0	A_21_P0012989	ENST00000503882	NA	XLOC_l2_012054		0.567059	5.95991	1.02838	0.331481	0.693247	-5.84282
122	36	0	A_32_P65628	NM_001008387	130120	REG3G	regenerating islet-derived 3 gamma	0.566981	6.18477	1.56023	0.154253	0.560423	-5.22399
270	100	0	A_21_P0000338	NR_002984	NA	SNORA56	small nucleolar RNA, H/ACA box 56	0.566787	7.35866	6.49735	0.000129458	0.0431898	1.57285
206	87	0	A_21_P0004939	TCONS_00011948	NA	XLOC_005461		-0.56628	5.58119	-1.46223	0.1788	0.584954	-5.3502
154	7	0	A_33_P3233819	A_33_P3233819	NA			-0.5658	6.18135	-1.61045	0.14288	0.548513	-5.15758
101	13	0	A_21_P0000943	ENST00000438791	NA	XLOC_000034		0.565502	5.86086	1.58005	0.149672	0.554936	-5.19792
356	126	0	A_33_P3294002	NM_017436	53947	A4GALT	alpha 1,4-galactosyltransferase	0.564945	12.4566	1.62085	0.140622	0.546432	-5.14369
153	55	0	A_21_P0006700	ENST00000424701	NA	XLOC_008603		-0.564923	5.81513	-1.29039	0.230115	0.626759	-5.5593
36	109	0	A_33_P3222362	NR_040033	729950	LOC729950	uncharacterized LOC729950	0.564665	6.05302	1.21573	0.256009	0.64507	-5.64475
7	158	0	A_33_P3319625	NM_001134673	4774	NFIA	nuclear factor I/A	0.564391	7.46863	1.57369	0.151129	0.55618	-5.20631
276	111	0	A_23_P353056	NM_014807	9854	C2CD2L	C2CD2-like	0.564195	12.3082	1.13076	0.28833	0.666136	-5.73761
277	117	0	A_21_P0004920	TCONS_00011918	NA	XLOC_005426		-0.564165	6.17562	-1.2429	0.246321	0.639048	-5.61406
46	140	0	A_21_P0007538	TCONS_00020366	NA	XLOC_009696		0.563618	5.8939	1.16289	0.275743	0.658094	-5.70306
35	152	0	A_23_P316511	NM_002146	3213	HOXB3	homeobox B3	0.563088	5.9997	1.10741	0.297758	0.673347	-5.76226
163	134	0	A_33_P3405848	NM_175719	7173	TPO	thyroid peroxidase	-0.562904	6.32733	-1.60109	0.144941	0.550585	-5.17004
181	96	0	A_21_P0002401	TCONS_00004139	NA	XLOC_001983		-0.562343	5.73216	-1.49673	0.169791	0.576277	-5.3063
294	160	0	A_33_P3345534	NM_000526	3861	KRT14	keratin 14	-0.561799	5.74356	-1.64399	0.135712	0.541024	-5.11262
185	1	0	A_23_P319492	NM_024556	79607	FAM118B	family with sequence similarity 118, member B	0.561705	9.96316	1.16666	0.274294	0.657319	-5.69896
102	80	0	A_21_P0001797	ENST00000412153	NA	XLOC_002406		0.56157	5.85546	1.39895	0.196414	0.601178	-5.4291
258	3	0	A_21_P0013168	TCONS_l2_00025618	NA	XLOC_l2_013267		-0.561495	6.49221	-1.61015	0.142946	0.548623	-5.15798
110	142	0	A_33_P3412320	NR_024409	100128164	LOC100128164	four and a half LIM domains 1 pseudogene	0.560589	6.13407	0.986025	0.350716	0.704132	-5.88408
86	22	0	A_33_P3246188	NM_001200049	54777	C10orf92	chromosome 10 open reading frame 92	0.560533	5.96475	0.97263	0.35697	0.707983	-5.89685
32	164	0	A_21_P0007568	TCONS_00020447	NA	XLOC_009780		0.560358	6.08544	1.25697	0.241423	0.635736	-5.59798
209	47	0	A_23_P110299	NM_001059	6870	TACR3	tachykinin receptor 3	-0.560253	5.52956	-1.76658	0.112217	0.510816	-4.9444
314	53	0	A_21_P0008583	TCONS_00023298	NA	XLOC_011167		-0.559936	5.87262	-1.51274	0.165748	0.571783	-5.28573
4	86	0	A_23_P50646	NM_001193621	390940	LOC390940	uncharacterized protein ENSP00000244321	-0.559694	7.53425	-8.20639	2.19842e-05	0.0145039	3.1865
17	15	0	A_24_P174775	ENST00000264663	23530	NNT	nicotinamide nucleotide transhydrogenase	0.559477	6.48567	1.58447	0.148668	0.554292	-5.19209
191	124	0	A_33_P3317412	NM_172239	254958	REXO1L1	REX1, RNA exonuclease 1 homolog (S. cerevisiae)-like 1	-0.559382	6.04361	-1.3908	0.198788	0.602439	-5.43911
283	6	0	A_33_P3331150	ENST00000390606	NA			-0.558919	6.02064	-1.65228	0.133991	0.538837	-5.10142
174	59	0	A_21_P0006901	TCONS_00018301	NA	XLOC_008577		0.558483	5.69931	1.2664	0.238187	0.633133	-5.58714
165	59	0	A_21_P0006148	TCONS_00015989	NA	XLOC_007368		-0.558421	6.57105	-2.35853	0.0435924	0.388551	-4.071
16	39	0	A_21_P0014426	NR_040535	NA	LOC100506472	uncharacterized LOC100506472	0.558026	7.0687	0.967366	0.359451	0.709259	-5.90182
27	162	0	A_33_P3250148	NM_198956	221833	SP8	Sp8 transcription factor	0.55679	10.3967	3.47419	0.00735991	0.229137	-2.34601
351	70	0	A_32_P199884	NM_032132	84072	HORMAD1	HORMA domain containing 1	-0.556616	5.65476	-1.18496	0.267353	0.651877	-5.67892
231	135	0	A_21_P0002740	ENST00000523129	NA	XLOC_002643		-0.556459	6.0561	-1.46102	0.179122	0.585086	-5.35172
275	124	0	A_23_P110234	NM_001890	1446	CSN1S1	casein alpha s1	-0.556307	6.28376	-1.31206	0.223021	0.622112	-5.53385
193	150	0	A_23_P11397	NR_001537	83868	TTTY13	testis-specific transcript, Y-linked 13 (non-protein coding)	-0.556083	6.21545	-1.67369	0.129639	0.533494	-5.0724
274	91	0	A_24_P240242	NM_002375	4134	MAP4	microtubule-associated protein 4	-0.556032	7.21959	-1.32706	0.21822	0.618937	-5.51608
69	68	0	A_33_P3332180	NM_002900	5949	RBP3	retinol binding protein 3, interstitial	0.555976	6.01454	1.35677	0.20897	0.610633	-5.48049
14	15	0	A_24_P357100	NM_014310	23551	RASD2	RASD family, member 2	0.555857	6.66301	1.21337	0.256864	0.645701	-5.64739
40	18	0	A_23_P21134	NM_004083	1649	DDIT3	DNA-damage-inducible transcript 3	0.555596	10.1804	5.8605	0.000273048	0.0616636	0.867197
38	88	0	A_33_P3349252	AL512723	81787	DKFZP547L112	uncharacterized protein DKFZp547L112	0.555428	11.1547	2.31161	0.0470276	0.398535	-4.14275
36	99	0	A_23_P200489	NM_014698	9725	TMEM63A	transmembrane protein 63A	0.555107	6.98511	1.30529	0.225217	0.623913	-5.54183
40	79	0	A_21_P0000979	ENST00000456878	NA	XLOC_000224		0.554886	5.92463	1.07244	0.312336	0.681738	-5.79847
155	146	0	A_21_P0010304	NM_052997	NA	ANKRD30A	ankyrin repeat domain 30A	-0.554072	5.96274	-2.52311	0.0334022	0.359689	-3.81744
13	39	0	A_32_P191860	NM_001025591	284402	SCGBL	secretoglobin-like	0.554055	7.31658	1.25652	0.241578	0.635736	-5.59849
250	151	0	A_33_P3354201	NM_001037499	245928	DEFB114	defensin, beta 114	-0.553286	5.81359	-1.43172	0.187111	0.592429	-5.3885
14	39	0	A_33_P3249888	NM_032735	144453	BEST3	bestrophin 3	0.552849	5.95682	0.968207	0.359054	0.709073	-5.90103
111	58	0	A_32_P173114	NR_038388	729444	LOC729444	uncharacterized LOC729444	0.55271	5.91914	1.08794	0.305804	0.678341	-5.78252
271	122	0	A_21_P0007859	TCONS_00021244	NA	XLOC_009935		-0.551482	5.70041	-1.73318	0.118217	0.518244	-4.99081
40	27	0	A_21_P0011996	ENST00000444955	NA	XLOC_l2_007184		0.551441	5.91699	1.08056	0.308903	0.68011	-5.79014
45	28	0	A_23_P83498	NM_006546	10642	IGF2BP1	insulin-like growth factor 2 mRNA binding protein 1	0.551339	6.01497	1.13348	0.287245	0.665123	-5.73471
276	124	0	A_33_P3328154	ENST00000483919	84503	ZNF527	zinc finger protein 527	-0.55116	6.7634	-1.6076	0.143506	0.549191	-5.16139
297	131	0	A_23_P201459	NM_022873	2537	IFI6	interferon, alpha-inducible protein 6	-0.551142	11.8211	-3.32342	0.00930425	0.247928	-2.57615
81	146	0	A_32_P86180	ENST00000369123	NA			0.550828	10.9227	2.54253	0.0323691	0.356303	-3.78736
162	101	0	A_21_P0003755	TCONS_00008548	NA	XLOC_004045		-0.550792	5.81348	-2.895	0.0183424	0.305534	-3.23912
267	3	0	A_23_P160336	NM_020997	10637	LEFTY1	left-right determination factor 1	-0.550113	7.74823	-3.30748	0.0095392	0.251059	-2.6006
165	5	0	A_21_P0014341	XR_109348	NA	LOC100506001	uncharacterized LOC100506001	-0.549606	6.04484	-1.75592	0.114101	0.513412	-4.95925
11	111	0	A_23_P117298	NM_000131	2155	F7	coagulation factor VII (serum prothrombin conversion accelerator)	0.549571	6.51603	1.2821	0.232877	0.628942	-5.56895
8	123	0	A_33_P3221808	AL080137	389715	FAM205B	transmembrane protein C9orf144B pseudogene	0.548999	6.01662	1.1987	0.262237	0.64959	-5.66374
14	133	0	A_23_P133036	NM_006424	10568	SLC34A2	solute carrier family 34 (sodium phosphate), member 2	0.548772	5.90347	1.0944	0.303118	0.676492	-5.77583
20	16	0	A_24_P312325	ENST00000500944	NA			-0.548723	7.23936	-4.47294	0.00167923	0.140279	-0.893206
175	76	0	A_33_P3357609	NM_001160419	81030	ZBP1	Z-DNA binding protein 1	0.548633	5.90994	1.23975	0.247428	0.639391	-5.61764
164	102	0	A_33_P3356492	ENST00000451257	NA			-0.54779	6.54927	-1.73995	0.116976	0.517207	-4.98142
11	142	0	A_21_P0014530	ENST00000554614	NA	LOC100287558		0.547703	5.91282	1.5284	0.161876	0.568438	-5.26549
237	116	0	A_33_P3273822	ENST00000434234	80204	FBXO11	F-box protein 11	-0.547675	5.82266	-1.55495	0.155495	0.560856	-5.23091
110	83	0	A_21_P0013458	ENST00000453187	NA	XLOC_l2_014061		0.546958	5.83528	0.998517	0.344957	0.70143	-5.87205
100	13	0	A_21_P0006606	TCONS_00017647	NA	XLOC_008323		0.546667	6.21343	1.67163	0.130051	0.534039	-5.0752
313	136	0	A_33_P3219260	NM_016484	51248	PDZD11	PDZ domain containing 11	0.546625	12.6511	1.26579	0.238392	0.633294	-5.58783
81	101	0	A_33_P3523583	NR_033858	642924	LOC642924	uncharacterized LOC642924	0.546435	5.84418	1.37532	0.203365	0.606591	-5.45801
128	107	0	A_23_P100189	NM_002761	5619	PRM1	protamine 1	0.54642	6.36148	1.19247	0.264548	0.650357	-5.67064
197	28	0	A_21_P0006625	BX358171	NA	XLOC_008837		-0.546419	5.74762	-1.24535	0.245462	0.638208	-5.61127
228	117	0	A_33_P3314341	ENST00000374244	158405	KIAA1958	KIAA1958	-0.546361	6.7204	-1.64337	0.135842	0.541129	-5.11345
152	65	0	A_21_P0010114	TCONS_00028640	NA	XLOC_013687		-0.546197	6.01491	-10.8955	2.27603e-06	0.00267283	5.07385
324	44	0	A_23_P316850	NM_182577	284451	ODF3L2	outer dense fiber of sperm tails 3-like 2	0.545417	10.8467	7.19461	6.04816e-05	0.0268311	2.27757
101	130	0	A_24_P108738	NM_153334	91179	SCARF2	scavenger receptor class F, member 2	0.545253	12.1892	5.25028	0.00058693	0.0916563	0.131554
13	33	0	A_23_P129665	NM_005353	3681	ITGAD	integrin, alpha D	0.544431	5.86291	0.977547	0.354665	0.706623	-5.89218
170	95	0	A_33_P3418566	DA346981	NA			-0.544356	5.77605	-1.52824	0.161915	0.568491	-5.2657
70	68	0	A_23_P114259	NM_080873	140456	ASB11	ankyrin repeat and SOCS box containing 11	0.54374	5.82579	1.12807	0.289404	0.667111	-5.74047
14	144	0	A_23_P53039	NM_002301	3948	LDHC	lactate dehydrogenase C	0.543466	7.17701	1.84813	0.0987397	0.491848	-4.82947
17	6	0	A_24_P357386	NM_181622	337960	KRTAP13-3	keratin associated protein 13-3	0.543353	5.67231	1.03103	0.330305	0.692625	-5.84019
154	32	0	A_33_P3220847	A_33_P3220847	NA			0.54319	5.84851	1.02982	0.330842	0.692748	-5.84139
76	89	0	A_33_P3369854	NM_153614	374407	DNAJB13	DnaJ (Hsp40) homolog, subfamily B, member 13	-0.542986	7.86827	-8.44039	1.76419e-05	0.0123319	3.37927
13	62	0	A_21_P0001184	ENST00000419446	NA	XLOC_001067		0.541973	5.86629	0.963732	0.361171	0.710614	-5.90525
346	68	0	A_24_P220822	NM_174952	285555	C4orf37	chromosome 4 open reading frame 37	-0.54192	5.67623	-1.415	0.191808	0.597263	-5.40928
43	79	0	A_21_P0011174	TCONS_l2_00007058	NA	XLOC_l2_003888		0.541718	5.91404	1.02337	0.333711	0.694363	-5.84776
283	19	0	A_33_P3322400	ENST00000536986	NA			-0.540906	5.75465	-1.22183	0.253805	0.643681	-5.63789
220	23	0	A_21_P0004437	THC2720758	NA	XLOC_004982		-0.540705	5.62616	-1.96444	0.0821296	0.465483	-4.66193
200	87	0	A_33_P3319006	NM_000606	733	C8G	complement component 8, gamma polypeptide	-0.540588	7.27196	-1.39943	0.196274	0.60112	-5.42851
149	140	0	A_21_P0005168	TCONS_00012739	NA	XLOC_005737		-0.53929	5.9375	-1.28445	0.232092	0.628585	-5.56622
84	16	0	A_21_P0010449	ENST00000422971	NA	XLOC_014399		0.539224	5.82793	1.01426	0.337803	0.696954	-5.85673
254	130	0	A_33_P3218975	NM_001776	953	ENTPD1	ectonucleoside triphosphate diphosphohydrolase 1	-0.539091	5.83191	-1.43515	0.186161	0.591924	-5.38422
167	72	0	A_23_P139600	NM_004658	8437	RASAL1	RAS protein activator like 1 (GAP1 like)	-0.538875	6.84232	-2.96193	0.0164797	0.298685	-3.13497
106	115	0	A_23_P131825	NM_003279	7125	TNNC2	troponin C type 2 (fast)	-0.537773	7.70992	-7.89881	2.95849e-05	0.0171994	2.92349
43	80	0	A_24_P231829	NM_017614	23743	BHMT2	betaine--homocysteine S-methyltransferase 2	0.537416	5.90112	1.06648	0.314875	0.683268	-5.80455
257	69	0	A_33_P3356990	NM_130464	23117	NPIPL3	nuclear pore complex interacting protein-like 3	-0.53713	6.02381	-1.51714	0.164652	0.570986	-5.28006
70	114	0	A_33_P3342195	A_33_P3342195	NA			0.537019	6.15672	1.16517	0.274867	0.657781	-5.70059
148	140	0	A_21_P0009292	TCONS_00025541	NA	XLOC_012368		-0.536976	5.64233	-1.37807	0.202545	0.605788	-5.45466
236	28	0	A_24_P260101	NM_007289	4311	MME	membrane metallo-endopeptidase	-0.53668	6.23607	-1.67084	0.13021	0.534138	-5.07627
202	110	0	A_24_P341116	NR_015340	388007	SERPINA13	serpin peptidase inhibitor, clade A (alpha-1 antiproteinase, antitrypsin), member 13 (pseudogene)	0.536564	5.78914	1.89477	0.091729	0.481551	-4.76276
101	15	0	A_23_P6263	NM_002463	4600	MX2	myxovirus (influenza virus) resistance 2 (mouse)	-0.535783	6.55867	-4.04147	0.00312584	0.174435	-1.5036
153	10	0	A_21_P0012699	THC2770561	NA	XLOC_l2_011407		-0.535705	5.78988	-1.72855	0.119072	0.519389	-4.99721
186	60	0	A_21_P0011998	TCONS_l2_00015234	NA	XLOC_l2_007186		-0.535518	5.75175	-2.03789	0.0730499	0.449703	-4.55422
153	8	0	A_33_P3352572	A_33_P3352572	NA			-0.535355	6.0049	-1.7923	0.107792	0.504669	-4.9084
227	141	0	A_23_P214897	NM_144497	9590	AKAP12	A kinase (PRKA) anchor protein 12	0.535351	11.662	5.52903	0.000411166	0.0742844	0.475017
11	87	0	A_24_P140057	NM_020868	57628	DPP10	dipeptidyl-peptidase 10 (non-functional)	0.535075	6.34451	1.08438	0.307296	0.679194	-5.7862
88	6	0	A_33_P3262069	NM_001004490	338755	OR2AG2	olfactory receptor, family 2, subfamily AG, member 2	0.534849	6.70989	1.28717	0.231183	0.627948	-5.56305
98	78	0	A_33_P3294440	A_33_P3294440	NA			0.534786	5.95778	1.01938	0.3355	0.695826	-5.8517
207	46	0	A_21_P0003330	NR_040108	NA	LOC728175	uncharacterized LOC728175	-0.534616	5.78875	-1.62913	0.138847	0.544683	-5.1326
15	53	0	A_33_P3290909	NM_006306	8243	SMC1A	structural maintenance of chromosomes 1A	0.534044	14.1897	5.30806	0.000544707	0.0873867	0.203777
254	8	0	A_33_P3287661	AK126997	100130430	LOC100130430	uncharacterized LOC100130430	0.53393	14.8123	1.27465	0.235385	0.6311	-5.5776
135	125	0	A_21_P0002409	TCONS_00004162	NA	XLOC_002005		0.53385	5.99286	0.907627	0.388495	0.72858	-5.95679
215	46	0	A_21_P0009166	ENST00000447729	NA	XLOC_012176		0.533616	9.42401	6.38282	0.000147499	0.0460803	1.45046
44	27	0	A_21_P0013843	ENST00000456621	NA	XLOC_l2_015468		0.533419	5.7803	1.18696	0.266603	0.651509	-5.67672
40	136	0	A_23_P353005	NM_152553	154214	RNF217	ring finger protein 217	0.53317	5.7901	1.24082	0.24705	0.63933	-5.61642
206	45	0	A_21_P0001826	ENST00000449986	NA	XLOC_001354		-0.533149	5.97261	-1.68009	0.128364	0.531693	-5.0637
91	83	0	A_23_P46936	NM_000399	1959	EGR2	early growth response 2	-0.532914	7.67931	-7.33996	5.19632e-05	0.0242153	2.4161
97	77	0	A_19_P00809747	NR_037902	NA	LOC100507537	uncharacterized LOC100507537	0.532421	5.89279	1.44035	0.184728	0.590694	-5.37772
89	43	0	A_24_P8109	NM_001012302	338440	ANO9	anoctamin 9	0.532129	6.28468	1.08434	0.307311	0.679194	-5.78624
144	11	0	A_23_P206626	NM_001039	6340	SCNN1G	sodium channel, nonvoltage-gated 1, gamma	-0.531957	5.76565	-1.65246	0.133954	0.538765	-5.10118
215	49	0	A_33_P3419970	NM_148896	256933	NPB	neuropeptide B	0.53193	14.0758	11.5671	1.39371e-06	0.00194844	5.44959
266	91	0	A_33_P3218797	ENST00000370177	79144	PPDPF	pancreatic progenitor cell differentiation and proliferation factor homolog (zebrafish)	0.531905	14.3122	6.76878	9.56271e-05	0.0355376	1.8553
188	16	0	A_23_P348028	NM_014440	27179	IL36A	interleukin 36, alpha	-0.531875	6.02579	-1.09146	0.304339	0.677454	-5.77888
168	122	0	A_33_P3381963	THC2490007	NA			-0.531732	5.56663	-2.87918	0.0188135	0.306599	-3.26375
331	137	0	A_21_P0003719	TCONS_00008434	NA	XLOC_003881		0.531311	7.94623	1.51449	0.165311	0.571534	-5.28347
308	157	0	A_21_P0014172	ENST00000289352	NA	LOC100507025		-0.531058	8.32936	-5.5085	0.000421934	0.0755326	0.450143
111	40	0	A_33_P3358789	THC2558186	NA			0.530793	5.93888	1.08686	0.30626	0.678475	-5.78364
258	29	0	A_24_P115529	XR_108997	51145	LOC51145	erythrocyte transmembrane protein	-0.530622	5.52498	-1.49114	0.171222	0.577281	-5.31345
282	120	0	A_21_P0001863	AK125615	NA	XLOC_001489		-0.530525	5.69276	-1.25612	0.241716	0.635843	-5.59895
282	19	0	A_33_P3301346	ENST00000491996	375316	RBM44	RNA binding motif protein 44	-0.530339	6.08654	-1.24597	0.245245	0.638208	-5.61056
162	83	0	A_33_P3327687	AK090681	727993	LOC727993	uncharacterized LOC727993	0.530284	6.90553	3.65749	0.0055551	0.211788	-2.06941
257	29	0	A_23_P75764	NM_001004728	219982	OR5A1	olfactory receptor, family 5, subfamily A, member 1	-0.529972	6.11463	-1.89868	0.0911639	0.480737	-4.75715
122	30	0	A_21_P0006811	TCONS_00018084	NA	XLOC_008342		0.52976	5.66642	1.42073	0.190188	0.595483	-5.40218
136	95	0	A_32_P452655	NM_001040078	654346	LGALS9C	lectin, galactoside-binding, soluble, 9C	-0.529632	10.4521	-8.55136	1.59209e-05	0.011263	3.46855
330	162	0	A_23_P106016	NM_002742	5587	PRKD1	protein kinase D1	-0.529521	6.25113	-2.67412	0.0261682	0.333267	-3.58303
142	96	0	A_21_P0004145	ENST00000507781	NA	XLOC_004888		-0.529396	5.69328	-1.41515	0.191765	0.597263	-5.4091
267	123	0	A_21_P0014305	XR_109233	NA	LOC100507452	uncharacterized LOC100507452	-0.529206	7.03853	-1.62095	0.140601	0.546432	-5.14356
229	118	0	A_23_P156708	NM_032470	7148	TNXB	tenascin XB	-0.529054	8.10399	-6.0164	0.000226373	0.0575118	1.04566
290	126	0	A_33_P3263423	NM_003268	7100	TLR5	toll-like receptor 5	0.528936	8.26161	1.72403	0.119912	0.520465	-5.00345
232	101	0	A_21_P0003482	ENST00000510169	NA	XLOC_004002		-0.528911	5.59646	-1.31663	0.221548	0.620583	-5.52845
165	6	0	A_33_P3362991	THC2666857	NA			-0.528821	5.93973	-3.02298	0.0149508	0.28944	-3.0401
314	136	0	A_24_P205364	NM_004169	6470	SHMT1	serine hydroxymethyltransferase 1 (soluble)	0.528814	8.23741	1.81289	0.104366	0.499782	-4.87941
264	69	0	A_33_P3357658	NM_003484	8091	HMGA2	high mobility group AT-hook 2	-0.528732	5.70122	-1.48371	0.173143	0.579019	-5.32294
12	123	0	A_19_P00321194	NR_002838	NA	KC6		0.528635	5.94766	1.05515	0.319744	0.687179	-5.81604
159	12	0	A_21_P0010634	TCONS_l2_00001391	NA	XLOC_l2_001011		-0.52778	5.93773	-1.03014	0.330698	0.692737	-5.84107
239	145	0	A_21_P0012662	TCONS_l2_00021103	NA	XLOC_l2_011098		-0.527664	5.74776	-1.84021	0.0999779	0.493684	-4.84072
162	24	0	A_21_P0009289	DB455053	NA	XLOC_012365		-0.527437	5.61007	-2.0036	0.0771615	0.457138	-4.60467
225	61	0	A_32_P70927	NM_207339	203569	PAGE2	P antigen family, member 2 (prostate associated)	-0.527139	7.67224	-7.62744	3.87382e-05	0.019441	2.68201
307	159	0	A_33_P3213288	NM_004847	199	AIF1	allograft inflammatory factor 1	-0.526922	7.01001	-8.83921	1.22596e-05	0.00934867	3.69395
281	131	0	A_23_P390665	NM_173615	146177	VWA3A	von Willebrand factor A domain containing 3A	-0.526833	5.9387	-1.17303	0.271863	0.655613	-5.69202
166	5	0	A_33_P3292198	NM_080675	140732	SUN5	Sad1 and UNC84 domain containing 5	-0.526821	6.86692	-2.20771	0.0556138	0.41678	-4.30053
34	22	0	A_21_P0004533	ENST00000524297	NA	XLOC_004626		0.526655	5.94882	0.967381	0.359443	0.709259	-5.90181
14	160	0	A_21_P0014457	XR_109914	NA	LOC643085	uncharacterized LOC643085	0.526296	5.91409	1.61855	0.141118	0.54715	-5.14677
9	159	0	A_33_P3349619	A_33_P3349619	NA			0.525701	7.60417	2.10617	0.0654804	0.437299	-4.45293
199	113	0	A_21_P0002078	ENST00000431897	NA	XLOC_002231		-0.52568	5.92	-1.671	0.130179	0.534138	-5.07606
139	89	0	A_33_P3277575	ENST00000404147	113130	CDCA5	cell division cycle associated 5	-0.52566	6.34874	-1.3694	0.205139	0.607929	-5.4652
24	151	0	A_33_P3292896	NM_144579	94097	SFXN5	sideroflexin 5	0.525218	10.2393	2.34082	0.0448593	0.391984	-4.09812
219	158	0	A_21_P0009931	THC2713069	NA	XLOC_013448		-0.525143	5.96276	-1.52969	0.161561	0.568048	-5.26382
95	31	0	A_21_P0005956	TCONS_00015375	NA	XLOC_006941		0.525103	5.80417	1.17819	0.269903	0.653845	-5.68636
185	58	0	A_23_P102172	NM_173077	130749	CPO	carboxypeptidase O	-0.524604	6.09717	-7.93933	2.84352e-05	0.0168649	2.95878
42	13	0	A_21_P0011310	NM_004667	NA	HERC2	hect domain and RLD 2	0.524275	6.65244	2.54244	0.0323736	0.356303	-3.78749
9	32	0	A_21_P0007413	THC2695809	NA	XLOC_009583		0.523839	5.95855	1.00113	0.34376	0.700946	-5.86952
71	141	0	A_19_P00801407	ENST00000506431	NA	XLOC_005077	0	0.523265	5.98132	1.22203	0.253733	0.643681	-5.63767
7	44	0	A_33_P3330264	NM_001511	2919	CXCL1	chemokine (C-X-C motif) ligand 1 (melanoma growth stimulating activity, alpha)	0.523168	7.09146	1.18253	0.268267	0.65244	-5.6816
213	48	0	A_23_P368067	NM_018833	6891	TAP2	transporter 2, ATP-binding cassette, sub-family B (MDR/TAP)	-0.523078	5.49752	-2.05367	0.0712282	0.44616	-4.5309
215	70	0	A_21_P0004427	TCONS_00010428	NA	XLOC_004942		-0.522696	6.02799	-1.83185	0.101303	0.495063	-4.85259
253	162	0	A_21_P0009309	TCONS_00025602	NA	XLOC_012430		-0.522655	5.61325	-1.5011	0.168679	0.575397	-5.3007
104	14	0	A_33_P3338360	NR_003002	677768	SCARNA13	small Cajal body-specific RNA 13	0.522347	9.68262	5.22088	0.000609771	0.092312	0.094589
99	140	0	A_33_P3258003	NM_152788	56899	ANKS1B	ankyrin repeat and sterile alpha motif domain containing 1B	0.522275	6.57084	1.55918	0.1545	0.560473	-5.22537
145	88	0	A_23_P314672	NM_144663	143501	C11orf40	chromosome 11 open reading frame 40	-0.52227	5.87335	-1.87511	0.0946254	0.48633	-4.79097
175	132	0	A_21_P0004018	ENST00000512650	NA	XLOC_004435		-0.522261	6.66479	-8.76133	1.31486e-05	0.00989806	3.63384
12	150	0	A_23_P85240	NM_016562	51284	TLR7	toll-like receptor 7	0.521908	6.05464	1.05968	0.317788	0.68613	-5.81145
270	121	0	A_23_P106362	NM_020980	366	AQP9	aquaporin 9	-0.521778	5.62289	-2.16112	0.0599461	0.425944	-4.37069
182	19	0	A_23_P105012	NM_017878	54979	HRASLS2	HRAS-like suppressor 2	-0.521437	6.8384	-1.55681	0.155057	0.560541	-5.22848
214	15	0	A_24_P274270	NM_139266	6772	STAT1	signal transducer and activator of transcription 1, 91kDa	-0.521096	9.00194	-5.44279	0.000458497	0.0794146	0.3701
161	25	0	A_24_P260699	NM_003958	9025	RNF8	ring finger protein 8	-0.520949	5.7689	-1.636	0.13739	0.542792	-5.12338
294	118	0	A_21_P0007137	ENST00000455671	NA	XLOC_009023		0.520927	10.8306	6.00318	0.000229971	0.0575118	1.03067
83	102	0	A_21_P0013358	TCONS_l2_00026979	NA	XLOC_l2_014057		0.520885	6.01924	1.086	0.306618	0.678812	-5.78453
14	52	0	A_21_P0008522	TCONS_00023044	NA	XLOC_010915		0.520734	5.91406	0.821379	0.433336	0.754781	-6.03101
41	80	0	A_33_P3371247	A_33_P3371247	NA			0.520285	5.95746	0.987841	0.349874	0.703643	-5.88234
280	3	0	A_33_P3352058	BC092495	NA			-0.519712	5.62889	-1.53388	0.16054	0.566926	-5.25838
105	27	0	A_33_P3289825	AK125674	NA			0.519487	5.84432	1.55263	0.156044	0.561583	-5.23394
39	99	0	A_33_P3363645	NM_001114618	4245	MGAT1	mannosyl (alpha-1,3-)-glycoprotein beta-1,2-N-acetylglucosaminyltransferase	0.519188	7.04554	0.96652	0.35985	0.709479	-5.90262
72	69	0	A_33_P3213029	NM_017763	54894	RNF43	ring finger protein 43	0.518744	6.2463	1.09755	0.301814	0.67576	-5.77256
123	31	0	A_21_P0006628	ENST00000422661	NA	XLOC_008923		0.518583	5.86343	1.13134	0.288097	0.665971	-5.73698
142	54	0	A_33_P3315375	NM_001104587	91607	SLFN11	schlafen family member 11	0.518532	5.62881	1.2794	0.233782	0.629727	-5.57209
93	31	0	A_21_P0003926	BC043537	NA	XLOC_004429		0.518501	5.98599	0.982512	0.352348	0.705389	-5.88744
273	125	0	A_33_P3317442	NM_024979	23263	MCF2L	MCF.2 cell line derived transforming sequence-like	-0.518449	7.12236	-1.37272	0.204144	0.607406	-5.46118
181	99	0	A_33_P3284311	ENST00000458577	NA			-0.517911	5.93205	-1.50862	0.166779	0.573025	-5.29103
46	15	0	A_21_P0008359	BM991113	NA	XLOC_010880		0.517555	5.95192	1.13258	0.287603	0.665465	-5.73566
257	28	0	A_33_P3347291	NM_001199219	11185	INMT	indolethylamine N-methyltransferase	-0.517484	6.03697	-3.01187	0.0152176	0.290968	-3.05735
123	37	0	A_33_P3217364	NM_001083124	727830	FAM75A3	family with sequence similarity 75, member A3	0.51742	5.90479	1.2463	0.245129	0.638154	-5.61018
279	7	0	A_33_P3255964	NR_003599	643160	CYMP	chymosin pseudogene	-0.517342	6.22737	-1.57382	0.151098	0.556164	-5.20613
12	161	0	A_23_P152125	NM_002461	4597	MVD	mevalonate (diphospho) decarboxylase	0.516983	9.99896	8.27284	2.0642e-05	0.0138616	3.24187
267	125	0	A_23_P365725	NM_147199	259249	MRGPRX1	MAS-related GPR, member X1	-0.516735	5.76134	-1.23165	0.250292	0.640953	-5.62682
71	120	0	A_21_P0005279	ENST00000416100	NA	XLOC_006332		0.51663	6.16966	1.03552	0.328317	0.691664	-5.83572
50	45	0	A_33_P3247783	A_33_P3247783	NA			0.514948	5.9078	0.926599	0.379093	0.722279	-5.93964
230	61	0	A_21_P0000357	NR_003014	NA	SNORA47	small nucleolar RNA, H/ACA box 47	-0.514525	8.14022	-6.2356	0.000174845	0.0505731	1.29025
183	51	0	A_24_P125335	NM_005408	6357	CCL13	chemokine (C-C motif) ligand 13	-0.514477	5.61204	-1.51677	0.164744	0.570995	-5.28054
146	50	0	A_23_P382094	NR_026869	145978	LINC00052	long intergenic non-protein coding RNA 52	-0.514251	5.7773	-1.52785	0.16201	0.56857	-5.2662
126	61	0	A_33_P3330886	NM_001005518	403282	OR6C65	olfactory receptor, family 6, subfamily C, member 65	0.513504	5.85739	1.08639	0.306455	0.678677	-5.78413
312	51	0	A_23_P417173	NM_002234	3741	KCNA5	potassium voltage-gated channel, shaker-related subfamily, member 5	-0.513446	5.72247	-1.24976	0.24392	0.637587	-5.60623
214	47	0	A_21_P0001054	ENST00000453569	NA	XLOC_000546		-0.513376	5.79286	-2.33483	0.0452954	0.393376	-4.10728
171	48	0	A_21_P0012045	ENST00000422118	NA	XLOC_l2_007785		-0.513337	6.02059	-1.74893	0.115352	0.514594	-4.96898
349	69	0	A_19_P00316743	NR_027103	NA	LOC285375	uncharacterized LOC285375	-0.513332	6.09113	-1.35219	0.210374	0.612329	-5.48601
24	99	0	A_21_P0006540	TCONS_00017346	NA	XLOC_008190		0.513141	6.18012	1.36032	0.207886	0.609991	-5.4762
161	39	0	A_23_P13907	NM_000618	3479	IGF1	insulin-like growth factor 1 (somatomedin C)	0.513124	5.93042	1.80654	0.105412	0.500925	-4.88836
229	102	0	A_21_P0009899	ENST00000441029	NA	XLOC_013726		-0.512982	5.58435	-1.42778	0.188211	0.593287	-5.39342
28	100	0	A_33_P3299220	NM_025008	54507	ADAMTSL4	ADAMTS-like 4	0.512981	7.22342	1.27867	0.23403	0.629922	-5.57294
142	59	0	A_24_P710999	A_24_P710999	NA			0.512915	5.72654	1.30004	0.226933	0.625085	-5.548
42	139	0	A_33_P3214750	A_33_P3214750	NA			0.51282	5.85308	1.21186	0.257414	0.646088	-5.64908
184	76	0	A_33_P3338484	BX476374	NA			-0.51281	6.27727	-1.01222	0.338722	0.697647	-5.85872
85	110	0	A_19_P00319308	THC2680667	NA	Q9BVX4		0.512728	5.97317	1.29491	0.228621	0.625908	-5.55402
223	95	0	A_23_P1173	NM_004132	3026	HABP2	hyaluronan binding protein 2	-0.511786	5.62086	-1.44976	0.182157	0.58788	-5.36591
192	27	0	A_24_P203953	BC037281	439951	LOC439951	uncharacterized LOC439951	0.511617	14.828	4.26086	0.00227141	0.15613	-1.18968
225	95	0	A_23_P163195	NM_152447	145581	LRFN5	leucine rich repeat and fibronectin type III domain containing 5	-0.511207	5.56513	-1.36815	0.205516	0.608291	-5.46672
100	109	0	A_23_P359870	ENST00000400102	NA			-0.511182	6.89237	-3.58757	0.00618136	0.219026	-2.17448
72	141	0	A_33_P3285299	NM_014696	9721	GPRIN2	G protein regulated inducer of neurite outgrowth 2	0.510826	7.04699	1.58473	0.148608	0.554292	-5.19174
9	85	0	A_21_P0006685	ENST00000441348	NA	XLOC_008512		0.510303	6.4514	1.17651	0.27054	0.654524	-5.6882
135	75	0	A_33_P3287610	ENST00000390313	NA			-0.510069	5.87122	-2.04806	0.0718709	0.447003	-4.5392
120	19	0	A_21_P0001923	ENST00000450667	NA	XLOC_001699		0.509974	8.94373	3.10511	0.0131215	0.282103	-2.91271
224	53	0	A_23_P110412	NM_001080506	441027	TMEM150C	transmembrane protein 150C	-0.509826	7.78449	-3.00666	0.0153447	0.291961	-3.06545
177	19	0	A_23_P166438	NM_030642	80831	APOL5	apolipoprotein L, 5	-0.50967	5.87488	-1.89432	0.0917941	0.481626	-4.76341
214	116	0	A_33_P3248602	NM_033178	22947	DUX4	double homeobox 4	-0.509367	8.57731	-0.663093	0.524428	0.803798	-6.15045
199	87	0	A_33_P3382588	NM_005430	7471	WNT1	wingless-type MMTV integration site family, member 1	-0.508947	5.86899	-1.60225	0.144684	0.55044	-5.1685
223	94	0	A_33_P3298120	NM_001037558	641654	HEPN1	hepatocellular carcinoma, down-regulated 1	-0.508706	6.19524	-1.40617	0.194331	0.599243	-5.4202
318	146	0	A_21_P0009729	TCONS_00027115	NA	XLOC_013162		-0.508625	5.87926	-2.01836	0.0753646	0.453028	-4.58298
168	100	0	A_33_P3318653	NM_001005479	79295	OR5H6	olfactory receptor, family 5, subfamily H, member 6	0.508404	6.03085	1.38177	0.201446	0.604453	-5.45015
73	119	0	A_23_P154235	NM_004688	9111	NMI	N-myc (and STAT) interactor	0.507988	5.91076	1.03004	0.330742	0.692737	-5.84117
135	21	0	A_21_P0009952	TCONS_00028137	NA	XLOC_013495		0.507702	6.24248	0.982027	0.352574	0.705694	-5.88791
5	160	0	A_21_P0004943	TCONS_00011955	NA	XLOC_005466		0.507464	5.98066	2.23639	0.0531009	0.411275	-4.25715
208	45	0	A_21_P0007000	TCONS_00018525	NA	XLOC_008832		-0.506975	5.7912	-2.45434	0.0373336	0.371953	-3.9237
281	20	0	A_21_P0010370	ENST00000458154	NA	XLOC_014300		-0.506652	6.98216	-1.37026	0.204882	0.607815	-5.46416
282	7	0	A_21_P0011269	THC2666914	NA	XLOC_l2_004385		-0.506538	5.85134	-1.59502	0.146293	0.552191	-5.17811
313	5	0	A_33_P3283550	ENST00000463881	100507650	LOC100507650	RING finger protein C14orf164-like	-0.50624	5.63796	-1.07173	0.312635	0.682082	-5.79919
197	77	0	A_21_P0013962	XM_003118611	NA	LOC100506667	uncharacterized protein LOC100506667	-0.505934	5.63571	-2.54599	0.032188	0.356088	-3.78199
292	155	0	A_21_P0007993	ENST00000452288	NA	XLOC_010606		-0.505783	5.50783	-1.52399	0.162957	0.569422	-5.2712
151	8	0	A_21_P0011920	TCONS_l2_00014590	NA	XLOC_l2_008031		-0.50463	6.14352	-1.87336	0.0948868	0.486582	-4.79347
160	27	0	A_21_P0008606	TCONS_00023344	NA	XLOC_011205		0.504317	5.75932	1.27366	0.235719	0.631588	-5.57875
124	56	0	A_21_P0014932	XR_133300	NA	LOC100507006	uncharacterized LOC100507006	0.504262	6.33417	1.7652	0.11246	0.511001	-4.94633
373	87	0	A_21_P0014237	XR_108981	NA	LOC100507332	uncharacterized LOC100507332	-0.50426	6.81783	-4.23317	0.00236392	0.158789	-1.2289
277	116	0	A_23_P94552	NM_013390	23670	TMEM2	transmembrane protein 2	0.504231	7.22994	1.25354	0.24261	0.636604	-5.60191
188	118	0	A_33_P3209924	ENST00000431698	NA			-0.503538	5.66288	-1.49766	0.169552	0.576103	-5.3051
208	134	0	A_33_P3372104	A_33_P3372104	NA			-0.503422	6.36266	-1.2981	0.227568	0.625285	-5.55027
37	3	0	A_33_P3376872	NM_007352	23436	CELA3B	chymotrypsin-like elastase family, member 3B	0.503298	5.8941	1.10084	0.300455	0.675111	-5.76913
10	133	0	A_23_P103803	NM_052939	115352	FCRL3	Fc receptor-like 3	0.503158	5.94639	0.967111	0.359571	0.709259	-5.90207
316	122	0	A_32_P119569	NR_033350	390535	GOLGA8E	golgin A8 family, member E	0.502978	8.68199	3.02316	0.0149464	0.28944	-3.03982
128	117	0	A_33_P3321372	ENST00000377653	79937	CNTNAP3	contactin associated protein-like 3	0.502843	7.10416	1.80059	0.1064	0.502858	-4.89674
138	45	0	A_33_P3395753	ENST00000450891	NA			0.502487	5.8168	1.16916	0.273337	0.656347	-5.69624
89	151	0	A_21_P0001552	TCONS_00001601	NA	XLOC_000927		-0.502426	5.88365	-1.80904	0.104999	0.500484	-4.88483
220	20	0	A_21_P0005902	TCONS_00015165	NA	XLOC_007211		-0.502328	5.54304	-2.01673	0.0755617	0.453702	-4.58539
326	4	0	A_33_P3275610	AK123256	NA			-0.502139	5.60977	-1.03262	0.329597	0.692265	-5.8386
169	81	0	A_33_P3352687	NR_028326	100133161	LOC100133161	uncharacterized LOC100133161	0.5021	15.4539	9.8235	5.27452e-06	0.00476997	4.40161
45	139	0	A_32_P47870	ENST00000425264	NA			0.501522	5.88839	1.64233	0.13606	0.54152	-5.11486
266	38	0	A_21_P0004993	THC2497134	NA	XLOC_005587		-0.501454	6.71292	-1.16313	0.275651	0.657998	-5.7028
131	104	0	A_21_P0009844	XR_109613	NA	LOC100130157	uncharacterized LOC100130157	-0.501131	6.72435	-6.94357	7.90392e-05	0.0326827	2.03166
130	60	0	A_24_P388786	NM_001369	1767	DNAH5	dynein, axonemal, heavy chain 5	0.50102	5.61221	1.06667	0.314793	0.683268	-5.80436
109	58	0	A_33_P3417740	ENST00000416309	NA			0.500829	6.06929	1.50558	0.167545	0.57422	-5.29494
196	150	0	A_33_P3718699	AK096897	283737	LOC283737	uncharacterized LOC283737	-0.500773	6.08541	-1.58456	0.148647	0.554292	-5.19197
310	52	0	A_21_P0003779	TCONS_00008601	NA	XLOC_004105		-0.500766	6.45714	-1.24009	0.247306	0.639391	-5.61725
64	101	0	A_21_P0003466	ENST00000508292	NA	XLOC_003961		0.500589	5.93928	0.834496	0.426295	0.751336	-6.02012
334	28	0	A_33_P3374758	NM_006141	1783	DYNC1LI2	dynein, cytoplasmic 1, light intermediate chain 2	0.500345	10.5179	3.87517	0.00399993	0.191882	-1.74622
213	26	0	A_33_P3384885	ENST00000359035	118472	ZNF511	zinc finger protein 511	0.500147	8.58248	8.37269	1.87919e-05	0.0128303	3.32413
14	3	0	A_21_P0007055	TCONS_00018704	NA	XLOC_008434		0.498702	5.83638	2.24002	0.0527908	0.410885	-4.25165
186	61	0	A_23_P121695	NM_006419	10563	CXCL13	chemokine (C-X-C motif) ligand 13	-0.498621	5.87709	-1.37407	0.203738	0.606801	-5.45953
116	101	0	A_33_P3276813	NM_001142800	346007	EYS	eyes shut homolog (Drosophila)	0.497819	7.99566	2.72955	0.0239303	0.327222	-3.49677
329	75	0	A_23_P109229	NM_080675	140732	SUN5	Sad1 and UNC84 domain containing 5	-0.497738	6.31659	-0.978812	0.354073	0.706436	-5.89097
136	78	0	A_33_P3316587	NM_007105	5003	SLC22A18AS	solute carrier family 22 (organic cation transporter), member 18 antisense	0.49611	6.09749	1.334	0.216029	0.617101	-5.50781
211	47	0	A_23_P212945	NM_000200	3347	HTN3	histatin 3	-0.495424	5.43844	-1.63304	0.138017	0.543645	-5.12736
159	107	0	A_33_P3226620	NM_014336	23746	AIPL1	aryl hydrocarbon receptor interacting protein-like 1	-0.495271	5.75435	-2.47823	0.0359177	0.367995	-3.88682
163	121	0	A_33_P3293169	NM_017749	55626	AMBRA1	autophagy/beclin-1 regulator 1	-0.495005	6.39008	-7.85651	3.08399e-05	0.0175808	2.88644
306	142	0	A_23_P98431	NM_000190	3145	HMBS	hydroxymethylbilane synthase	0.494762	14.7526	1.55698	0.155018	0.560541	-5.22826
372	96	0	A_21_P0009295	TCONS_00025555	NA	XLOC_012383		0.494663	9.87053	2.85621	0.0195196	0.309208	-3.29952
196	49	0	A_23_P121665	NM_020777	57537	SORCS2	sortilin-related VPS10 domain containing receptor 2	-0.494523	6.2059	-1.25696	0.241427	0.635736	-5.59799
9	43	0	A_33_P3299811	NR_027286	642946	FLVCR1-AS1	FLVCR1 antisense RNA 1 (non-protein coding)	0.494326	9.79566	2.08282	0.0679791	0.441785	-4.48768
242	108	0	A_24_P274270	NM_139266	6772	STAT1	signal transducer and activator of transcription 1, 91kDa	-0.494291	9.29479	-6.77773	9.46914e-05	0.035414	1.86443
11	53	0	A_33_P3238410	NM_002972	6305	SBF1	SET binding factor 1	0.494215	7.15905	1.24953	0.244002	0.637657	-5.60649
280	125	0	A_23_P388331	NM_001187	574	BAGE	B melanoma antigen	-0.494191	5.71883	-1.42278	0.189611	0.594497	-5.39963
119	13	0	A_21_P0013053	TCONS_l2_00024560	NA	XLOC_l2_012844		0.494048	5.7917	1.54953	0.156781	0.562152	-5.238
133	39	0	A_33_P3235706	BC048301	23318	ZCCHC11	zinc finger, CCHC domain containing 11	0.493948	6.6792	2.00273	0.0772693	0.457465	-4.60595
220	157	0	A_33_P3212269	ENST00000534743	5606	MAP2K3	mitogen-activated protein kinase kinase 3	-0.493555	5.81398	-1.25923	0.240643	0.635277	-5.59538
304	20	0	A_33_P3383029	NM_130439	4601	MXI1	MAX interactor 1	0.493365	11.9222	4.26023	0.00227346	0.15613	-1.19056
233	144	0	A_21_P0013454	ENST00000463748	NA	XLOC_l2_014034		-0.493362	5.69563	-1.39249	0.198294	0.602329	-5.43704
161	107	0	A_24_P68991	NM_006168	4825	NKX6-1	NK6 homeobox 1	-0.49296	5.69174	-2.70363	0.0249516	0.330823	-3.53712
137	134	0	A_21_P0002738	ENST00000432250	NA	XLOC_002615		-0.491655	5.78263	-2.49974	0.034689	0.363876	-3.85358
236	29	0	A_21_P0010007	TCONS_00028323	NA	XLOC_013664		-0.491538	5.76241	-1.20039	0.261613	0.64908	-5.66186
143	115	0	A_21_P0009588	TCONS_00026574	NA	XLOC_012893		0.491438	5.92288	1.02181	0.33441	0.694699	-5.8493
135	57	0	A_21_P0002510	TCONS_00004464	NA	XLOC_002342		-0.491409	5.92562	-1.18816	0.266156	0.651137	-5.6754
171	38	0	A_21_P0000903	NR_040111	NA	LOC100505782	uncharacterized LOC100505782	0.49136	5.8165	1.03173	0.329994	0.692566	-5.8395
82	16	0	A_24_P162173	NM_001149	288	ANK3	ankyrin 3, node of Ranvier (ankyrin G)	0.491298	5.93873	1.03978	0.326444	0.690848	-5.83148
134	83	0	A_23_P141394	NM_017983	55062	WIPI1	WD repeat domain, phosphoinositide interacting 1	0.491083	11.8951	11.6987	1.26978e-06	0.00194844	5.51949
269	4	0	A_21_P0012764	ENST00000513681	NA	XLOC_l2_011007		-0.490852	5.89458	-1.69105	0.126205	0.529274	-5.04873
82	3	0	A_24_P49896	NM_182833	220032	GDPD4	glycerophosphodiester phosphodiesterase domain containing 4	0.490761	5.99673	2.42364	0.0392349	0.37659	-3.971
116	46	0	A_21_P0008719	TCONS_00023623	NA	XLOC_011422		0.490541	5.75179	1.18673	0.266691	0.651549	-5.67698
190	107	0	A_23_P354288	NM_153606	149647	FAM71A	family with sequence similarity 71, member A	-0.490494	6.15602	-0.902318	0.391156	0.729954	-5.96154
20	125	0	A_33_P3246935	NM_052896	114784	CSMD2	CUB and Sushi multiple domains 2	0.489982	6.08646	1.08814	0.305723	0.678324	-5.78232
147	84	0	A_33_P3386414	NM_152418	138009	DCAF4L2	DDB1 and CUL4 associated factor 4-like 2	-0.489816	5.77547	-1.93691	0.0858021	0.471336	-4.70193
148	31	0	A_21_P0014054	XM_001717208	NA	LOC645177	uncharacterized LOC645177	-0.489758	6.04081	-0.907975	0.388321	0.728422	-5.95648
142	58	0	A_33_P3242632	NR_033930	646743	LOC646743	uncharacterized LOC646743	-0.489683	5.77309	-2.34774	0.0443596	0.39027	-4.08752
300	116	0	A_24_P289139	NM_001024666	30011	SH3KBP1	SH3-domain kinase binding protein 1	0.489585	9.10034	2.4486	0.0376817	0.373343	-3.93254
274	68	0	A_33_P3318946	NM_021817	60484	HAPLN2	hyaluronan and proteoglycan link protein 2	0.489556	12.8508	2.31701	0.0466195	0.396857	-4.13452
18	71	0	A_33_P3387985	NR_015401	255031	FLJ35390	uncharacterized LOC255031	0.489281	5.98102	0.816354	0.436053	0.756325	-6.03514
222	82	0	A_21_P0007360	TCONS_00019653	NA	XLOC_009458		-0.489095	6.57671	-1.42469	0.189073	0.593997	-5.39725
17	77	0	A_21_P0002229	TCONS_00003716	NA	XLOC_001504		0.488687	5.90335	1.10101	0.300386	0.675111	-5.76895
221	54	0	A_21_P0008976	TCONS_00024480	NA	XLOC_011797		-0.488636	5.44759	-2.25422	0.0515951	0.409765	-4.23011
201	159	0	A_33_P3410821	A_33_P3410821	NA			0.488241	8.51193	3.74266	0.00488153	0.202885	-1.94224
44	164	0	A_21_P0000393	NR_003077	NA	SNORD99	small nucleolar RNA, C/D box 99	0.488211	8.57407	4.2872	0.00218698	0.15342	-1.15247
160	122	0	A_23_P120629	NM_001672	434	ASIP	agouti signaling protein	-0.488047	6.2364	-1.70109	0.124257	0.526236	-5.03499
331	52	0	A_24_P831309	NM_207401	388759	C1orf229	chromosome 1 open reading frame 229	0.487686	11.8525	1.93684	0.0858124	0.471336	-4.70204
5	110	0	A_21_P0014160	XR_108646	NA	LOC100505697	uncharacterized LOC100505697	0.487658	7.38018	1.48024	0.174046	0.57992	-5.32736
126	108	0	A_23_P107454	NM_031958	83896	KRTAP3-1	keratin associated protein 3-1	0.487497	6.21496	1.65331	0.133779	0.538759	-5.10004
14	69	0	A_33_P3418218	NM_033127	89866	SEC16B	SEC16 homolog B (S. cerevisiae)	0.487301	6.12583	1.84781	0.0987891	0.491848	-4.82992
143	78	0	A_23_P117662	NM_002112	3067	HDC	histidine decarboxylase	0.487276	6.25088	1.35537	0.209397	0.611088	-5.48217
11	45	0	A_23_P35293	NM_005268	2709	GJB5	gap junction protein, beta 5, 31.1kDa	0.486459	5.76635	1.09897	0.301227	0.675433	-5.77108
8	32	0	A_21_P0013632	TCONS_l2_00029283	NA	XLOC_l2_015172		0.486155	6.07852	1.0963	0.302331	0.676002	-5.77386
181	81	0	A_23_P111804	NM_022750	64761	PARP12	poly (ADP-ribose) polymerase family, member 12	-0.486063	6.07383	-1.95687	0.0831247	0.466842	-4.67296
205	86	0	A_21_P0001136	ENST00000449812	NA	XLOC_000850		-0.485792	5.96161	-1.96029	0.0826734	0.466278	-4.66797
262	68	0	A_21_P0004219	NR_024424	NA	LOC255167	uncharacterized LOC255167	-0.485722	5.82395	-1.4149	0.191838	0.59728	-5.40941
311	91	0	A_23_P1102	NM_001100	58	ACTA1	actin, alpha 1, skeletal muscle	-0.485239	8.02835	-3.79102	0.00453798	0.1987	-1.87042
176	69	0	A_21_P0013310	TCONS_l2_00026595	NA	XLOC_l2_013849		-0.485231	5.95955	-1.24339	0.246148	0.638849	-5.6135
290	109	0	A_23_P85171	NM_000117	2010	EMD	emerin	0.48517	11.534	2.20978	0.0554285	0.416446	-4.2974
120	36	0	A_23_P104594	NM_021920	6343	SCT	secretin	0.48491	6.17746	1.08386	0.307513	0.679294	-5.78673
235	132	0	A_24_P315500	NR_024567	100130557	LOC100130557	uncharacterized LOC100130557	0.484673	11.8781	2.28821	0.0488394	0.402541	-4.17843
259	153	0	A_33_P3246068	NM_014017	28956	LAMTOR2	late endosomal/lysosomal adaptor, MAPK and MTOR activator 2	0.484429	14.5883	4.07885	0.0029589	0.171821	-1.44961
116	102	0	A_21_P0006248	TCONS_00016246	NA	XLOC_007629		0.484301	5.89705	1.16278	0.275782	0.658096	-5.70318
172	63	0	A_23_P16415	NM_002333	4037	LRP3	low density lipoprotein receptor-related protein 3	0.484057	14.4658	6.34218	0.000154548	0.0470187	1.40655
352	69	0	A_24_P683861	ENST00000390594	NA			-0.484053	6.40001	-1.25968	0.24049	0.635108	-5.59487
183	76	0	A_21_P0001006	ENST00000442182	NA	XLOC_000364		-0.483951	5.70574	-1.5437	0.15817	0.563557	-5.2456
361	123	0	A_33_P3336696	ENST00000361335	4539	ND4L	NADH dehydrogenase, subunit 4L (complex I)	0.483933	16.6764	5.41129	0.000477234	0.0812225	0.331479
155	142	0	A_33_P3343090	NM_018174	55201	MAP1S	microtubule-associated protein 1S	0.483834	15.3258	2.69861	0.0251545	0.330823	-3.54494
157	84	0	A_21_P0012820	THC2679516	NA	XLOC_l2_011424		0.483722	6.07299	0.942685	0.371251	0.717394	-5.92488
14	117	0	A_21_P0014286	XR_109148	NA	LOC100507566	uncharacterized LOC100507566	0.48367	5.93758	0.908946	0.387836	0.728107	-5.95561
200	164	0	A_23_P357104	NM_001155	309	ANXA6	annexin A6	0.483403	11.1258	3.2213	0.010921	0.264902	-2.73316
293	145	0	A_21_P0000478	NR_003710	NA	SNORA11C	small nucleolar RNA, H/ACA box 11C (retrotransposed)	0.483383	9.17061	2.08939	0.0672672	0.440867	-4.47792
309	4	0	A_33_P3260941	NM_015159	23201	FAM168A	family with sequence similarity 168, member A	-0.483262	5.85849	-1.67459	0.129459	0.533433	-5.07118
252	6	0	A_24_P131589	NM_006889	942	CD86	CD86 molecule	0.483184	8.83585	1.41542	0.191691	0.597226	-5.40877
314	4	0	A_33_P3258732	A_33_P3258732	NA			-0.48283	5.58848	-1.30507	0.225288	0.623913	-5.54209
148	62	0	A_21_P0008148	TCONS_00021981	NA	XLOC_010584		-0.482754	5.97848	-1.73772	0.117384	0.517605	-4.98452
47	116	0	A_23_P120566	NM_001042576	6238	RRBP1	ribosome binding protein 1 homolog 180kDa (dog)	0.482685	10.5312	5.24328	0.000592284	0.092003	0.122765
199	104	0	A_21_P0007215	THC2653254	NA	XLOC_009146		-0.48268	8.13669	-7.88477	2.99951e-05	0.0172669	2.91122
152	75	0	A_23_P157920	NM_002173	3449	IFNA16	interferon, alpha 16	-0.482599	5.7908	-1.31936	0.220675	0.619919	-5.52522
94	144	0	A_24_P274270	NM_139266	6772	STAT1	signal transducer and activator of transcription 1, 91kDa	-0.482582	9.06863	-5.10968	0.000705269	0.0989306	-0.0464906
160	34	0	A_23_P103424	NM_033345	85397	RGS8	regulator of G-protein signaling 8	-0.482191	5.84141	-2.41472	0.0398054	0.377769	-3.98473
283	54	0	A_33_P3366246	NM_020120	56886	UGGT1	UDP-glucose glycoprotein glucosyltransferase 1	0.482096	11.8135	4.87743	0.000961198	0.115111	-0.347677
274	124	0	A_23_P17706	NM_014339	23765	IL17RA	interleukin 17 receptor A	-0.482055	6.69727	-1.30128	0.226527	0.624824	-5.54655
226	85	0	A_23_P210538	NM_182764	63916	ELMO2	engulfment and cell motility 2	-0.481898	8.34524	-2.7512	0.02311	0.325641	-3.46307
47	44	0	A_21_P0002545	TCONS_00004594	NA	XLOC_002498		0.481819	5.93221	0.932935	0.37599	0.720441	-5.93385
124	16	0	A_21_P0014811	XR_132642	NA	LOC100652927	uncharacterized LOC100652927	-0.481708	5.87008	-3.22899	0.0107896	0.263534	-2.72131
21	138	0	A_33_P3305458	NM_004381	1388	ATF6B	activating transcription factor 6 beta	-0.481347	8.71037	-1.25963	0.240505	0.635108	-5.59492
170	68	0	A_21_P0005606	TCONS_00014334	NA	XLOC_006491		-0.480851	6.42266	-1.95895	0.0828491	0.46635	-4.66992
259	43	0	A_23_P116640	NM_033180	79345	OR51B2	olfactory receptor, family 51, subfamily B, member 2	-0.480551	5.5604	-1.21596	0.255925	0.64499	-5.64449
276	21	0	A_33_P3417222	ENST00000378430	971	CD72	CD72 molecule	0.480438	14.8984	11.6302	1.33274e-06	0.00194844	5.48323
147	71	0	A_21_P0008749	TCONS_00023701	NA	XLOC_011506		-0.480298	5.94871	-1.78835	0.10846	0.505206	-4.91394
6	143	0	A_23_P29163	NR_003081	25774	GSTTP1	glutathione S-transferase theta pseudogene 1	0.480221	6.1308	1.86446	0.0962297	0.48837	-4.80619
108	9	0	A_33_P3347622	NM_001244767	92597	MOB1B	MOB kinase activator 1B	0.480095	11.4923	6.34859	0.000153412	0.046916	1.4135
89	59	0	A_33_P3383071	XR_133081	100653108	LOC100653108	uncharacterized LOC100653108	0.479807	6.13282	0.99353	0.347248	0.70273	-5.87687
198	75	0	A_33_P3357600	NM_006458	10612	TRIM3	tripartite motif containing 3	-0.479485	7.0411	-2.37224	0.0426364	0.386094	-4.04998
45	80	0	A_33_P3853081	M21191	228	ALDOAP2	aldolase A, fructose-bisphosphate pseudogene 2	0.479187	5.90844	1.21453	0.256444	0.645281	-5.6461
110	82	0	A_21_P0001718	THC2749835	NA	XLOC_000683		0.479012	8.18772	4.68152	0.00125566	0.124253	-0.608589
42	159	0	A_23_P373742	NM_178556	339976	TRIML1	tripartite motif family-like 1	0.478963	5.92541	1.10813	0.297466	0.673105	-5.76151
30	72	0	A_23_P106194	NM_005252	2353	FOS	FBJ murine osteosarcoma viral oncogene homolog	-0.478904	9.94937	-4.67396	0.00126882	0.124793	-0.618788
194	112	0	A_23_P18751	NM_014058	28983	TMPRSS11E	transmembrane protease, serine 11E	-0.47879	5.77239	-2.49937	0.03471	0.363876	-3.85416
286	7	0	A_33_P3233834	NM_001190981	3572	IL6ST	interleukin 6 signal transducer (gp130, oncostatin M receptor)	-0.478434	7.38324	-1.67429	0.129519	0.533433	-5.07159
220	104	0	A_33_P3337599	NM_006904	5591	PRKDC	protein kinase, DNA-activated, catalytic polypeptide	-0.478107	9.48976	-2.43532	0.0384999	0.375048	-3.953
45	136	0	A_23_P165707	NM_174898	129530	LYG1	lysozyme G-like 1	-0.477885	8.43568	-7.9937	2.69693e-05	0.0161587	3.00582
190	131	0	A_33_P3420633	NM_145270	146325	C16orf11	chromosome 16 open reading frame 11	-0.477676	6.31342	-2.9426	0.0169968	0.301105	-3.16504
84	15	0	A_23_P94879	NM_000506	2147	F2	coagulation factor II (thrombin)	0.477482	5.98384	0.979055	0.35396	0.706436	-5.89074
104	86	0	A_33_P3312242	NM_005624	6370	CCL25	chemokine (C-C motif) ligand 25	0.47743	5.71078	2.07776	0.0685332	0.44313	-4.4952
286	40	0	A_33_P3212949	NM_206933	7399	USH2A	Usher syndrome 2A (autosomal recessive, mild)	0.477351	5.91561	1.73832	0.117274	0.517545	-4.98368
242	79	0	A_23_P60591	NM_003315	7266	DNAJC7	DnaJ (Hsp40) homolog, subfamily C, member 7	0.476769	12.7899	2.1688	0.0592105	0.424601	-4.35917
293	133	0	A_21_P0012457	TCONS_l2_00019490	NA	XLOC_l2_010330		-0.476741	6.92431	-1.61693	0.141469	0.547461	-5.14893
218	130	0	A_21_P0002908	ENST00000424941	NA	XLOC_003327		-0.476709	5.97932	-1.30394	0.225656	0.624256	-5.54342
105	25	0	A_23_P67646	NM_014364	26330	GAPDHS	glyceraldehyde-3-phosphate dehydrogenase, spermatogenic	0.476453	5.80477	1.03302	0.329424	0.69219	-5.83822
133	54	0	A_21_P0007742	TCONS_00020884	NA	XLOC_010161		-0.476159	6.39416	-1.44214	0.184236	0.590266	-5.37547
89	19	0	A_23_P411772	NM_032096	56103	PCDHGB2	protocadherin gamma subfamily B, 2	0.476131	6.41254	1.10818	0.297443	0.673101	-5.76145
112	90	0	A_21_P0009552	TCONS_00026505	NA	XLOC_012830		0.476006	5.83958	1.1565	0.278209	0.659381	-5.70999
174	92	0	A_24_P59459	AK092226	63895	PIEZO2	piezo-type mechanosensitive ion channel component 2	-0.475978	5.9172	-1.10347	0.299374	0.6745	-5.76638
117	128	0	A_21_P0011497	ENST00000554640	NA	XLOC_l2_005287		0.475699	5.82535	1.37185	0.204404	0.607662	-5.46223
112	57	0	A_21_P0009550	TCONS_00026498	NA	XLOC_012824		0.475678	5.74491	1.18317	0.268027	0.65226	-5.6809
178	55	0	A_21_P0003287	XR_109997	NA	LOC100506865	uncharacterized LOC100506865	-0.47542	5.53143	-1.69317	0.125791	0.528558	-5.04583
42	78	0	A_21_P0002387	TCONS_00004111	NA	XLOC_001959		0.475188	5.99828	0.930672	0.377096	0.720931	-5.93592
281	127	0	A_23_P308603	NM_005417	6714	SRC	v-src sarcoma (Schmidt-Ruppin A-2) viral oncogene homolog (avian)	-0.475	11.8406	-1.59979	0.145229	0.551052	-5.17177
285	6	0	A_21_P0008141	TCONS_00021966	NA	XLOC_010562		-0.474734	5.62876	-1.55947	0.154432	0.560446	-5.22499
147	85	0	A_23_P371777	ENST00000490216	1636	ACE	angiotensin I converting enzyme (peptidyl-dipeptidase A) 1	-0.474478	5.82741	-2.29781	0.0480884	0.400222	-4.16381
12	33	0	A_33_P3311083	AK097512	653583	PHLDB3	pleckstrin homology-like domain, family B, member 3	0.474477	6.93096	1.61307	0.142309	0.548185	-5.15409
89	36	0	A_21_P0008455	TCONS_00022781	NA	XLOC_011064		0.474103	5.94825	1.13187	0.287885	0.665843	-5.73642
142	47	0	A_33_P3356941	A_33_P3356941	NA			-0.474044	5.93428	-1.99606	0.0780953	0.458944	-4.61573
21	79	0	A_23_P87545	NM_021034	10410	IFITM3	interferon induced transmembrane protein 3	-0.473603	11.9456	-5.77824	0.000301827	0.0644144	0.771499
77	122	0	A_21_P0007070	TCONS_00018783	NA	XLOC_008559		0.473583	8.23313	2.26376	0.0508067	0.4083	-4.21563
125	109	0	A_24_P340247	NM_182575	284359	IZUMO1	izumo sperm-egg fusion 1	0.473532	6.02357	2.29866	0.0480221	0.40005	-4.16251
230	123	0	A_33_P3340109	ENST00000398992	NA			-0.473489	5.66614	-1.9662	0.0819002	0.465126	-4.65937
85	109	0	A_21_P0007420	TCONS_00019804	NA	XLOC_009603		0.473464	6.25931	1.10822	0.297426	0.673101	-5.76141
94	147	0	A_23_P116741	NM_004764	9271	PIWIL1	piwi-like 1 (Drosophila)	0.473129	6.5723	1.1166	0.29402	0.670445	-5.7526
80	92	0	A_33_P3329991	A_33_P3329991	NA			0.472928	13.0023	1.18643	0.266804	0.651579	-5.67731
267	147	0	A_21_P0005002	TCONS_00012087	NA	XLOC_005617		0.472822	12.1911	5.16597	0.000655047	0.0949689	0.0251785
317	11	0	A_33_P3382271	BC033643	NA			0.47267	8.76407	5.22167	0.000609146	0.092312	0.0955819
252	145	0	A_23_P86540	NM_173081	219681	ARMC3	armadillo repeat containing 3	-0.472531	5.70321	-1.85002	0.098445	0.491405	-4.82677
61	99	0	A_21_P0009119	BC035173	NA	XLOC_011837		0.472521	8.98011	6.81257	9.114e-05	0.034867	1.89989
166	55	0	A_21_P0006832	TCONS_00018117	NA	XLOC_008377		-0.472387	5.75646	-1.22854	0.251401	0.641576	-5.63033
224	82	0	A_21_P0008068	THC2679047	NA	XLOC_010401		-0.471755	5.75663	-1.19465	0.263738	0.649887	-5.66823
264	86	0	A_23_P38154	NM_004110	2232	FDXR	ferredoxin reductase	-0.471715	15.3188	-6.41832	0.00014163	0.045443	1.48859
8	31	0	A_21_P0009459	BX111564	NA	XLOC_012631		0.471648	6.02679	1.16226	0.275985	0.658276	-5.70375
9	134	0	A_21_P0007869	TCONS_00021289	NA	XLOC_010016		0.471619	6.94344	1.27192	0.236309	0.631588	-5.58076
10	40	0	A_33_P3884230	NM_002501	4784	NFIX	nuclear factor I/X (CCAAT-binding transcription factor)	0.471409	8.57281	2.63961	0.0276676	0.340507	-3.63669
100	133	0	A_23_P20075	NM_013389	29881	NPC1L1	NPC1 (Niemann-Pick disease, type C1, gene)-like 1	-0.471253	8.62563	-4.65542	0.00130172	0.126144	-0.643819
11	137	0	A_33_P3225567	NM_024917	79979	TRMT2B	TRM2 tRNA methyltransferase 2 homolog B (S. cerevisiae)	0.471208	9.39344	4.55588	0.00149479	0.133566	-0.77919
12	45	0	A_23_P12082	NM_001025199	1117	CHI3L2	chitinase 3-like 2	0.471145	5.90095	1.10531	0.298618	0.67389	-5.76446
354	133	0	A_21_P0005421	TCONS_00013572	NA	XLOC_006223		-0.471056	6.13211	-1.20905	0.258439	0.646761	-5.65222
288	36	0	A_23_P26865	NM_002470	4621	MYH3	myosin, heavy chain 3, skeletal muscle, embryonic	-0.470928	7.96521	-5.31254	0.000541572	0.0872292	0.209356
190	157	0	A_21_P0003833	TCONS_00008794	NA	XLOC_003547		-0.470734	5.84995	-2.0587	0.0706574	0.445585	-4.52346
109	131	0	A_23_P113613	NM_022842	64866	CDCP1	CUB domain containing protein 1	0.470483	5.75515	1.84	0.100012	0.493714	-4.84103
145	64	0	A_21_P0014243	ENST00000438380	NA	LOC100505607		0.470294	6.13979	1.03353	0.329198	0.69219	-5.83771
270	122	0	A_32_P4595	NM_000337	6444	SGCD	sarcoglycan, delta (35kDa dystrophin-associated glycoprotein)	-0.470002	6.5051	-1.69832	0.124793	0.527085	-5.03879
7	84	0	A_33_P3245987	NP336097	NA			0.469746	6.34529	1.11219	0.295807	0.671817	-5.75724
169	111	0	A_23_P135990	NM_005630	6578	SLCO2A1	solute carrier organic anion transporter family, member 2A1	-0.469742	6.10832	-1.34997	0.211058	0.613076	-5.48868
118	50	0	A_21_P0005317	ENST00000456952	NA	XLOC_006521		-0.469564	6.1372	-2.05357	0.0712397	0.446185	-4.53105
142	76	0	A_24_P274270	NM_139266	6772	STAT1	signal transducer and activator of transcription 1, 91kDa	-0.469339	9.4815	-4.68264	0.00125372	0.124253	-0.607079
92	153	0	A_23_P110184	NM_006745	6307	MSMO1	methylsterol monooxygenase 1	0.469288	8.43873	4.44666	0.00174264	0.140667	-0.929554
220	53	0	A_23_P102017	NM_020711	57471	ERMN	ermin, ERM-like protein	-0.468637	5.6008	-2.01625	0.0756198	0.453866	-4.5861
154	127	0	A_21_P0006542	TCONS_00017356	NA	XLOC_008200		-0.468532	6.05083	-1.55068	0.156507	0.562109	-5.2365
174	124	0	A_23_P123402	NM_184086	84675	TRIM55	tripartite motif containing 55	0.468292	5.83216	1.51554	0.165049	0.571188	-5.28212
16	75	0	A_21_P0010843	ENST00000415417	NA	XLOC_l2_001760		0.468041	6.22792	0.785998	0.452719	0.766127	-6.05963
382	86	0	A_23_P219060	NM_022107	63940	GPSM3	G-protein signaling modulator 3	-0.467969	9.14493	-6.8408	8.83701e-05	0.0348243	1.92849
221	82	0	A_23_P419760	NM_006061	10321	CRISP3	cysteine-rich secretory protein 3	-0.467878	5.74428	-1.30444	0.225494	0.624072	-5.54283
14	70	0	A_21_P0012792	ENST00000500092	NA	XLOC_l2_011263		0.467876	5.84278	0.808438	0.440359	0.759107	-6.0416
137	79	0	A_21_P0012250	NM_001242313	NA	TMEM191B	transmembrane protein 191B	0.46734	8.45982	3.10047	0.0132184	0.282338	-2.91991
83	36	0	A_21_P0002438	TCONS_00004245	NA	XLOC_002085		0.46721	6.6126	3.16329	0.0119671	0.272991	-2.82269
33	21	0	A_21_P0014035	ENST00000454784	NA	LOC100653234		0.466773	5.88062	0.940833	0.372147	0.717969	-5.92659
31	18	0	A_33_P3270084	THC2524986	NA			0.466671	8.76435	4.03215	0.003169	0.175359	-1.51709
251	44	0	A_23_P63896	NM_000043	355	FAS	Fas (TNF receptor superfamily, member 6)	-0.466669	8.07457	-5.707	0.000329434	0.06803	0.687749
303	164	0	A_21_P0000968	ENST00000429328	NA	XLOC_000175		-0.466601	6.0438	-1.63951	0.13665	0.54202	-5.11865
43	138	0	A_24_P56689	NM_003456	7755	ZNF205	zinc finger protein 205	0.466444	10.7095	3.05623	0.0141802	0.286025	-2.98848
42	27	0	A_33_P3339696	A_33_P3339696	NA			0.46636	6.03941	1.26018	0.240317	0.635108	-5.59429
115	85	0	A_21_P0002420	TCONS_00004196	NA	XLOC_002042		0.465294	5.86271	1.06262	0.316524	0.684821	-5.80847
193	74	0	A_23_P411353	NM_152694	203430	ZCCHC5	zinc finger, CCHC domain containing 5	0.465104	5.60865	1.38965	0.199124	0.602711	-5.44051
88	59	0	A_23_P350678	ENST00000369720	80217	WDR96	WD repeat domain 96	0.465061	6.51568	1.22999	0.250884	0.641488	-5.62869
15	6	0	A_33_P3310154	NM_001004750	390058	OR51B6	olfactory receptor, family 51, subfamily B, member 6	0.465058	5.77356	1.07276	0.312197	0.681604	-5.79813
14	123	0	A_33_P3681776	NR_029409	255512	LOC255512	uncharacterized LOC255512	0.464586	7.88513	2.10855	0.0652308	0.436934	-4.44938
135	112	0	A_33_P3324228	ENST00000304488	NA			0.464526	6.18663	1.10399	0.299161	0.674407	-5.76584
266	117	0	A_23_P108734	NM_018436	55821	ALLC	allantoicase	-0.464398	7.60912	-5.15461	0.000664863	0.0961545	0.0107552
7	103	0	A_21_P0007196	TCONS_00019279	NA	XLOC_009112		0.464245	6.10121	1.02828	0.331525	0.693264	-5.84292
105	128	0	A_24_P173124	NM_144997	201163	FLCN	folliculin	-0.464139	7.5331	-6.0009	0.000230596	0.0575118	1.02809
114	108	0	A_23_P30805	NM_021968	8363	HIST1H4J	histone cluster 1, H4j	0.463319	13.7634	3.05978	0.0141006	0.285801	-2.98299
68	26	0	A_23_P9603	NM_006904	5591	PRKDC	protein kinase, DNA-activated, catalytic polypeptide	-0.463061	11.5714	-5.05493	0.000758139	0.1021	-0.116698
36	110	0	A_33_P3361422	NM_000784	1593	CYP27A1	cytochrome P450, family 27, subfamily A, polypeptide 1	-0.46278	8.32732	-6.64474	0.000109706	0.0399064	1.72754
214	68	0	A_21_P0008381	ENST00000553378	NA	XLOC_010920		-0.462621	5.71988	-1.88969	0.0924702	0.482681	-4.77007
59	155	0	A_33_P3408665	A_33_P3408665	NA			0.462208	13.7771	2.45135	0.0375142	0.372605	-3.9283
160	90	0	A_21_P0008008	TCONS_00021678	NA	XLOC_010683		-0.462187	5.65368	-1.55666	0.155092	0.560541	-5.22867
12	151	0	A_33_P3252316	ENST00000556472	NA			0.462121	6.02254	1.07424	0.311571	0.681209	-5.79662
202	38	0	A_19_P00321398	ENST00000522967	NA	XLOC_006757		-0.461801	6.04886	-1.30495	0.225329	0.623913	-5.54224
215	88	0	A_33_P3668839	NR_036539	644656	LOC644656	uncharacterized LOC644656	0.461529	10.1348	8.03657	2.58722e-05	0.0158243	3.04266
134	12	0	A_33_P3336252	NR_002163	100506759	OR7E37P	olfactory receptor, family 7, subfamily E, member 37 pseudogene	0.461497	6.24783	1.10394	0.29918	0.674407	-5.76589
166	54	0	A_33_P3286157	NM_003327	7293	TNFRSF4	tumor necrosis factor receptor superfamily, member 4	-0.461477	6.74041	-1.35716	0.208851	0.61054	-5.48002
280	37	0	A_32_P159400	NM_015902	51366	UBR5	ubiquitin protein ligase E3 component n-recognin 5	-0.46128	9.2251	-6.31765	0.00015898	0.0473555	1.37994
85	23	0	A_21_P0012167	TCONS_l2_00016966	NA	XLOC_l2_008976		0.461268	6.01955	0.922009	0.381352	0.723881	-5.94382
254	4	0	A_21_P0002965	TCONS_00006041	NA	XLOC_002682		-0.461001	5.87946	-1.48168	0.173669	0.579541	-5.32552
73	148	0	A_19_P00803575	NM_201274	NA	MPRIP	myosin phosphatase Rho interacting protein	-0.460611	8.19803	-1.88538	0.0931017	0.484173	-4.77625
13	16	0	A_21_P0012755	XR_133383	NA	LOC646890	axin interactor, dorsalization associated pseudogene	0.460251	5.72273	1.04605	0.323694	0.689135	-5.82519
163	7	0	A_33_P3421108	ENST00000507296	NA			0.459908	14.6908	5.85033	0.000276439	0.0619528	0.855422
145	84	0	A_21_P0008512	TCONS_00022980	NA	XLOC_010816		-0.459763	5.53859	-2.14692	0.0613315	0.429395	-4.39201
225	21	0	A_19_P00319633	NR_037178	NA	LOC100294145	uncharacterized LOC100294145	0.459631	9.45621	7.69686	3.61319e-05	0.0191661	2.74464
236	148	0	A_33_P3303394	A_33_P3303394	NA			0.459419	15.9286	2.02052	0.0751056	0.452343	-4.57981
113	109	0	A_21_P0001827	ENST00000414086	NA	XLOC_001355		0.459374	6.07153	1.06342	0.316182	0.684413	-5.80766
204	36	0	A_33_P3410484	NM_001193339	64849	SLC13A3	solute carrier family 13 (sodium-dependent dicarboxylate transporter), member 3	-0.459336	6.39884	-1.77688	0.110426	0.508032	-4.93002
277	162	0	A_24_P410389	NM_015367	23786	BCL2L13	BCL2-like 13 (apoptosis facilitator)	-0.459285	7.09537	-1.9601	0.082698	0.466278	-4.66825
40	12	0	A_23_P85082	NM_139282	158800	RHOXF1	Rhox homeobox family, member 1	0.459225	6.45797	0.866953	0.409214	0.741027	-5.99256
85	63	0	A_21_P0012721	ENST00000508199	NA	XLOC_l2_010636		0.458644	5.74598	1.03043	0.33057	0.692625	-5.84078
90	19	0	A_21_P0013905	ENST00000439217	NA	XLOC_l2_015942		0.458567	5.81065	1.15207	0.279929	0.660491	-5.71477
355	134	0	A_21_P0005896	TCONS_00015151	NA	XLOC_007195		-0.458441	5.80709	-1.30664	0.224777	0.623639	-5.54024
34	148	0	A_23_P63896	NM_000043	355	FAS	Fas (TNF receptor superfamily, member 6)	-0.458303	7.90714	-6.48245	0.000131663	0.043677	1.55704
17	7	0	A_33_P3378777	NR_026642	100132464	FAM99B	family with sequence similarity 99, member B (non-protein coding)	0.457929	5.78821	1.21913	0.254779	0.644487	-5.64093
146	134	0	A_19_P00319578	THC2524841	NA	XLOC_l2_010723		-0.457893	6.0693	-1.57739	0.15028	0.555515	-5.20144
94	47	0	A_21_P0010458	TCONS_00029736	NA	XLOC_014411		0.457873	5.80804	1.30859	0.224146	0.623053	-5.53795
366	158	0	A_19_P00807743	THC2734315	NA	XLOC_l2_010751		-0.45781	6.34801	-5.17697	0.000645691	0.0940771	0.0391255
340	16	0	A_33_P3211633	NM_006784	10885	WDR3	WD repeat domain 3	0.457808	9.07375	3.78487	0.00458023	0.198846	-1.87954
123	43	0	A_21_P0005831	TCONS_00015002	NA	XLOC_007082		0.457717	6.24766	1.27679	0.234662	0.630515	-5.57512
359	106	0	A_21_P0007652	TCONS_00020616	NA	XLOC_009933		-0.457681	5.93129	-1.31941	0.220658	0.619919	-5.52516
136	112	0	A_21_P0003737	TCONS_00008462	NA	XLOC_003922		0.457423	5.80296	1.39021	0.198961	0.602558	-5.43983
135	134	0	A_21_P0006215	TCONS_00016139	NA	XLOC_007531		-0.457361	5.72771	-1.72793	0.119186	0.519434	-4.99806
376	60	0	A_23_P115824	NM_012207	3189	HNRNPH3	heterogeneous nuclear ribonucleoprotein H3 (2H9)	0.457169	13.1158	1.44785	0.182675	0.588349	-5.3683
153	120	0	A_21_P0004730	BC042564	NA	XLOC_005610		-0.456298	5.66515	-1.97956	0.0801763	0.461948	-4.63987
43	117	0	A_33_P3241190	NM_005431	7516	XRCC2	X-ray repair complementing defective repair in Chinese hamster cells 2	0.456197	10.883	4.69203	0.00123762	0.124089	-0.594439
146	64	0	A_21_P0010513	AK055120	NA	XLOC_l2_000038		0.455734	5.85296	0.920315	0.382189	0.724516	-5.94535
249	45	0	A_23_P39790	NM_015717	50489	CD207	CD207 molecule, langerin	-0.455323	6.02422	-1.24802	0.244527	0.637741	-5.60821
83	149	0	A_33_P3349158	A_33_P3349158	NA			0.455009	5.90626	1.17637	0.270594	0.654561	-5.68836
163	59	0	A_23_P368805	NM_007072	11148	HHLA2	HERV-H LTR-associating 2	-0.454995	5.50371	-1.52814	0.161939	0.568491	-5.26582
151	13	0	A_21_P0003721	TCONS_00008436	NA	XLOC_003882		-0.454792	5.37128	-2.44817	0.0377078	0.373372	-3.9332
226	101	0	A_33_P3347020	A_33_P3347020	NA			-0.45403	5.63676	-1.71997	0.120669	0.521902	-5.00904
13	15	0	A_21_P0007102	TCONS_00018936	NA	XLOC_008826		0.453942	5.87944	0.937108	0.373956	0.719222	-5.93002
9	87	0	A_21_P0000767	NR_038330	NA	LOC100505540	uncharacterized LOC100505540	0.453929	5.98386	0.928983	0.377923	0.721527	-5.93747
45	123	0	A_23_P125278	NM_005409	6373	CXCL11	chemokine (C-X-C motif) ligand 11	0.453923	5.86037	0.965033	0.360554	0.710135	-5.90402
142	93	0	A_33_P3330990	AW002507	NA			0.45364	6.00984	1.04075	0.326016	0.690517	-5.83051
90	70	0	A_33_P3380850	NM_003990	5076	PAX2	paired box 2	0.453119	6.17518	0.970227	0.358101	0.708524	-5.89912
41	14	0	A_24_P933794	AY358802	646513	LOC646513	VLGN1945	0.45305	7.5892	1.44566	0.183273	0.588916	-5.37106
20	161	0	A_33_P3576034	BX248273	644919	LOC644919	uncharacterized LOC644919	0.452857	6.39283	1.48101	0.173845	0.579852	-5.32637
221	157	0	A_33_P3268129	ENST00000367356	NA			-0.452271	5.71181	-1.54792	0.157163	0.562491	-5.2401
93	135	0	A_23_P144126	NM_014375	26998	FETUB	fetuin B	0.451789	5.93559	0.922456	0.381132	0.723768	-5.94341
216	22	0	A_33_P3358851	A_33_P3358851	NA			-0.451484	7.26374	-2.06568	0.0698722	0.445425	-4.51312
9	144	0	A_24_P282383	NM_000257	4625	MYH7	myosin, heavy chain 7, cardiac muscle, beta	0.451432	6.67279	1.40848	0.193669	0.598728	-5.41735
270	90	0	A_33_P3245218	NM_001122679	57451	ODZ2	odz, odd Oz/ten-m homolog 2 (Drosophila)	-0.451349	5.96083	-1.24848	0.244368	0.637657	-5.6077
285	20	0	A_21_P0008937	TCONS_00024397	NA	XLOC_011720		-0.45127	5.73945	-1.21082	0.257791	0.646215	-5.65024
198	156	0	A_33_P3323959	NM_005045	5649	RELN	reelin	-0.451228	8.5102	-4.07692	0.00296727	0.171821	-1.45239
352	163	0	A_21_P0013459	ENST00000416982	NA	XLOC_l2_014061		-0.45117	6.12027	-1.33113	0.216932	0.617955	-5.51123
126	60	0	A_24_P118260	A_24_P118260	NA			0.45115	7.7705	2.16277	0.0597879	0.425887	-4.36823
75	141	0	A_33_P3239864	ENST00000319597	348094	ANKDD1A	ankyrin repeat and death domain containing 1A	0.450875	8.12181	1.61344	0.142228	0.548185	-5.15359
137	13	0	A_21_P0013270	NR_029401	NA	LOC731275	uncharacterized LOC731275	-0.450833	11.3143	-7.3875	4.94702e-05	0.0234253	2.46081
249	22	0	A_33_P3276653	NM_001009614	494118	SPANXN1	SPANX family, member N1	-0.450833	5.55389	-1.49839	0.169368	0.576051	-5.30417
315	53	0	A_24_P349807	NM_001145402	284418	FAM71E2	family with sequence similarity 71, member E2	-0.450674	5.77886	-1.19454	0.26378	0.649887	-5.66835
184	64	0	A_21_P0011159	TCONS_l2_00006991	NA	XLOC_l2_003843		0.450661	5.70449	1.43333	0.186663	0.592198	-5.38648
205	61	0	A_21_P0013679	ENST00000411575	NA	XLOC_l2_015322		-0.450305	5.70559	-1.83562	0.100703	0.494767	-4.84724
82	34	0	A_23_P62901	NM_006763	7832	BTG2	BTG family, member 2	-0.450209	12.3216	-10.4397	3.22401e-06	0.00357178	4.79956
318	55	0	A_24_P230948	NM_016831	8863	PER3	period homolog 3 (Drosophila)	0.449799	8.04968	3.74881	0.00483635	0.201941	-1.93309
185	88	0	A_23_P102172	NM_173077	130749	CPO	carboxypeptidase O	-0.449677	5.98552	-9.13563	9.43476e-06	0.00738641	3.91702
62	133	0	A_23_P104438	NM_032578	84665	MYPN	myopalladin	0.449573	5.88251	1.01208	0.338785	0.697647	-5.85886
113	11	0	A_23_P415974	NM_000035	229	ALDOB	aldolase B, fructose-bisphosphate	0.449101	5.76521	0.89878	0.392937	0.731223	-5.96469
151	96	0	A_19_P00805748	AK057513	NA	P39189		-0.44903	5.74139	-2.11042	0.0650353	0.436758	-4.44659
354	120	0	A_33_P3640690	NM_001128128	6935	ZEB1	zinc finger E-box binding homeobox 1	0.449006	10.1624	4.6658	0.00128318	0.125574	-0.629794
278	50	0	A_23_P69109	NM_021105	5359	PLSCR1	phospholipid scramblase 1	-0.448704	7.28578	-4.93832	0.000885592	0.110168	-0.267857
233	92	0	A_21_P0000444	NR_003319	NA	SNORD116-4	small nucleolar RNA, C/D box 116-4	-0.44857	6.78116	-1.34641	0.212158	0.613953	-5.49296
86	163	0	A_23_P170679	NM_000091	1285	COL4A3	collagen, type IV, alpha 3 (Goodpasture antigen)	0.448297	5.99014	1.3479	0.211696	0.613743	-5.49117
231	117	0	A_33_P3295917	ENST00000379113	3574	IL7	interleukin 7	-0.447922	6.07735	-1.22735	0.251828	0.642001	-5.63168
36	114	0	A_24_P384200	A_24_P384200	NA			0.447819	8.74258	1.27231	0.236176	0.631588	-5.58031
138	21	0	A_21_P0014564	XR_110321	NA	LOC100507363	uncharacterized LOC100507363	0.447792	5.86037	0.943892	0.370667	0.717132	-5.92376
199	142	0	A_21_P0000881	NR_040015	NA	LOC100631378	uncharacterized 100631378	-0.447608	5.7404	-2.15196	0.0608365	0.428519	-4.38445
252	162	0	A_21_P0001988	ENST00000433724	NA	XLOC_001932		-0.447427	6.14334	-1.38994	0.19904	0.60264	-5.44016
153	79	0	A_21_P0009756	TCONS_00027283	NA	XLOC_013285		-0.447043	5.76657	-1.8934	0.0919289	0.481846	-4.76474
271	113	0	A_32_P125338	NM_207334	163933	FAM43B	family with sequence similarity 43, member B	0.446755	8.4329	1.17679	0.270434	0.654321	-5.6879
214	17	0	A_33_P3367889	AK126078	100130657	LOC100130657	uncharacterized LOC100130657	0.446593	5.79417	1.73635	0.117634	0.517893	-4.98641
192	157	0	A_33_P3385711	NM_001005289	390067	OR52H1	olfactory receptor, family 52, subfamily H, member 1	-0.44653	5.54293	-1.67482	0.129412	0.533433	-5.07086
205	108	0	A_21_P0010474	BC040576	NA	XLOC_014323		0.446175	5.90456	1.44181	0.184327	0.590427	-5.37589
9	84	0	A_23_P356717	NM_181670	56899	ANKS1B	ankyrin repeat and sterile alpha motif domain containing 1B	0.445941	5.93622	1.0281	0.331605	0.693281	-5.84309
141	30	0	A_21_P0006275	TCONS_00016345	NA	XLOC_007726		-0.445644	6.03658	-1.68108	0.128167	0.531642	-5.06234
254	70	0	A_21_P0010718	ENST00000423394	NA	XLOC_l2_000399		-0.445609	5.73115	-1.88033	0.0938474	0.485835	-4.78348
39	79	0	A_21_P0012579	ENST00000503394	NA	XLOC_l2_010602		0.445416	6.01528	0.814865	0.436861	0.756946	-6.03636
77	14	0	A_21_P0003872	TCONS_00008970	NA	XLOC_003825		0.445121	5.79203	1.18929	0.265735	0.651011	-5.67416
202	128	0	A_33_P3267731	NR_034016	100130954	LOC100130954	uncharacterized LOC100130954	-0.444791	5.77488	-1.3804	0.201854	0.604955	-5.45183
81	102	0	A_33_P3252954	ENST00000382730	85409	NKD2	naked cuticle homolog 2 (Drosophila)	0.444769	6.27675	1.27919	0.233854	0.629813	-5.57234
234	115	0	A_19_P00321656	NM_001134445	NA	DDAH1		-0.44418	5.97218	-2.0319	0.0737527	0.450789	-4.56306
136	45	0	A_24_P497318	AF007131	100129973	LOC100129973	uncharacterized LOC100129973	0.444044	6.5725	1.43053	0.187442	0.592519	-5.38998
162	110	0	A_21_P0003314	NR_024087	NA	C4orf11	chromosome 4 open reading frame 11	-0.444002	5.66219	-1.43285	0.186797	0.592198	-5.38709
177	96	0	A_33_P3298267	A_33_P3298267	NA			-0.443744	6.88064	-1.54028	0.158992	0.564674	-5.25006
4	111	0	A_21_P0003026	TCONS_00006200	NA	XLOC_002796		0.443554	6.25375	2.05504	0.0710725	0.445717	-4.52887
159	39	0	A_21_P0004941	NR_038981	NA	LOC100507254	uncharacterized LOC100507254	0.443541	5.93718	1.11584	0.294328	0.670861	-5.75341
221	115	0	A_21_P0002236	ENST00000433065	NA	XLOC_001515		-0.443214	5.84557	-1.23489	0.249144	0.640291	-5.62315
231	78	0	A_23_P30813	NM_003541	8362	HIST1H4K	histone cluster 1, H4k	0.443045	13.7907	3.07019	0.0138692	0.284014	-2.96684
92	135	0	A_21_P0008077	TCONS_00021818	NA	XLOC_010418		0.442717	5.78604	0.932851	0.376031	0.720441	-5.93393
124	33	0	A_24_P263786	ENST00000474213	NA			0.44268	5.88189	1.65194	0.134061	0.539007	-5.10188
122	2	0	A_24_P273489	NM_207372	387694	SH2D4B	SH2 domain containing 4B	0.442661	6.17394	2.25205	0.0517761	0.409931	-4.23341
279	6	0	A_21_P0014849	XR_132721	NA	LOC100652765	uncharacterized LOC100652765	-0.442638	7.40816	-1.71386	0.12182	0.523592	-5.01745
110	27	0	A_21_P0005088	TCONS_00012364	NA	XLOC_005924		-0.442476	5.74952	-1.50024	0.168897	0.575509	-5.3018
23	100	0	A_24_P256155	NM_001146340	390010	NKX1-2	NK1 homeobox 2	0.44245	10.7603	1.8289	0.101774	0.495524	-4.85677
168	110	0	A_23_P211572	NM_145733	55964	2003-09-01	septin 3	-0.442172	6.94413	-0.990894	0.348463	0.703137	-5.87941
10	134	0	A_21_P0000878	NR_039998	NA	LOC100506655	uncharacterized LOC100506655	0.441661	5.91597	1.03248	0.329662	0.692305	-5.83875
39	11	0	A_21_P0008798	THC2701769	NA	XLOC_011603		0.441657	5.80779	0.942131	0.371519	0.717678	-5.92539
37	12	0	A_24_P355057	NM_022444	6561	SLC13A1	solute carrier family 13 (sodium/sulfate symporters), member 1	0.441602	5.6423	0.904749	0.389936	0.729138	-5.95936
343	41	0	A_33_P3418394	NM_004707	9140	ATG12	ATG12 autophagy related 12 homolog (S. cerevisiae)	0.441539	7.17443	4.41874	0.00181286	0.14216	-0.968297
134	49	0	A_21_P0005374	TCONS_00013425	NA	XLOC_006059		-0.441321	5.83774	-2.46644	0.0366096	0.370008	-3.90503
168	102	0	A_21_P0010194	ENST00000419694	NA	XLOC_014037		-0.440965	5.80114	-1.65815	0.132784	0.537459	-5.09348
165	30	0	A_23_P17316	NM_152864	128414	NKAIN4	Na+/K+ transporting ATPase interacting 4	-0.440821	5.85684	-1.73387	0.118089	0.518109	-4.98984
35	23	0	A_21_P0008946	TCONS_00024417	NA	XLOC_011726		0.440715	5.86004	0.913796	0.38542	0.726537	-5.95125
299	9	0	A_23_P157117	NM_182898	9586	CREB5	cAMP responsive element binding protein 5	-0.440573	10.4815	-4.00065	0.00331967	0.178336	-1.56279
157	112	0	A_33_P3314850	ENST00000390360	NA			0.440167	5.9139	2.01064	0.0763001	0.455435	-4.59434
159	28	0	A_21_P0005736	TCONS_00014799	NA	XLOC_006874		0.440139	5.72527	1.29941	0.227139	0.625085	-5.54874
150	58	0	A_24_P379820	NM_030926	81618	ITM2C	integral membrane protein 2C	0.439822	12.4023	1.99052	0.0787882	0.460044	-4.62384
179	65	0	A_21_P0014734	XR_113110	NA	LOC100507760	uncharacterized LOC100507760	-0.439762	7.90221	-2.10672	0.065423	0.437298	-4.45211
85	118	0	A_23_P160159	NM_003039	6518	SLC2A5	solute carrier family 2 (facilitated glucose/fructose transporter), member 5	-0.439712	6.60104	-6.08051	0.000209769	0.0556084	1.11796
52	160	0	A_21_P0002893	ENST00000498604	NA	XLOC_003296		0.43962	6.73322	1.7484	0.115447	0.514594	-4.9697
355	164	0	A_23_P121106	NM_003865	8820	HESX1	HESX homeobox 1	-0.439478	7.25354	-2.17234	0.0588737	0.423667	-4.35383
127	30	0	A_33_P3649472	NR_027078	283856	LOC283856	uncharacterized LOC283856	0.439459	5.7757	1.03498	0.328554	0.691775	-5.83626
167	87	0	A_33_P3253804	NM_005195	1052	CEBPD	CCAAT/enhancer binding protein (C/EBP), delta	0.439425	14.4706	4.04865	0.00309299	0.174287	-1.49321
164	68	0	A_21_P0008974	THC2674875	NA	XLOC_011795		-0.439425	5.97169	-1.1196	0.292807	0.669593	-5.74944
228	86	0	A_33_P3368506	NM_001080442	146167	SLC38A8	solute carrier family 38, member 8	-0.439345	6.17826	-6.85302	8.71999e-05	0.0347215	1.94083
37	109	0	A_24_P316430	NM_002526	4907	NT5E	5'-nucleotidase, ecto (CD73)	0.439318	7.90701	1.18823	0.266131	0.651137	-5.67533
275	5	0	A_21_P0001922	ENST00000414967	NA	XLOC_001698		-0.439307	5.63579	-1.04833	0.3227	0.688717	-5.82291
205	36	0	A_21_P0003387	ENST00000510034	NA	XLOC_003648		-0.439165	5.43948	-1.40681	0.194147	0.599224	-5.41941
189	57	0	A_23_P102172	NM_173077	130749	CPO	carboxypeptidase O	-0.438855	6.0228	-7.64395	3.81001e-05	0.0192882	2.69696
206	18	0	A_23_P116850	NM_000423	3849	KRT2	keratin 2	0.438675	5.59261	1.31378	0.222468	0.621342	-5.53183
227	12	0	A_33_P3337742	A_33_P3337742	NA			0.438519	11.1445	6.3069	0.000160965	0.0473555	1.36825
290	159	0	A_33_P3232861	ENST00000444375	NA			-0.438347	6.36993	-1.52505	0.162697	0.569384	-5.26983
220	68	0	A_23_P119040	NM_001142966	80000	GREB1L	growth regulation by estrogen in breast cancer-like	-0.438299	5.80968	-1.3365	0.215245	0.616454	-5.50483
42	136	0	A_21_P0002279	TCONS_00003834	NA	XLOC_001641		0.438261	5.76117	1.23631	0.24864	0.640065	-5.62154
21	127	0	A_33_P3275835	NM_001134430	27433	TOR2A	torsin family 2, member A	0.437958	13.5138	2.73931	0.0235569	0.326394	-3.48158
260	48	0	A_21_P0000413	NR_003209	NA	SNORD114-16	small nucleolar RNA, C/D box 114-16	-0.437725	5.66729	-1.40339	0.195131	0.600026	-5.42363
82	150	0	A_33_P3300740	BI056255	NA			0.437325	6.70211	0.972874	0.356856	0.707983	-5.89662
238	7	0	A_21_P0008648	THC2613233	NA	XLOC_011294		-0.437175	5.84429	-2.05322	0.0712794	0.446195	-4.53156
264	105	0	A_23_P46482	NM_018724	50604	IL20	interleukin 20	0.437025	5.78206	1.08972	0.305063	0.67796	-5.78068
253	45	0	A_21_P0013356	TCONS_l2_00026970	NA	XLOC_l2_014051		-0.437001	5.59549	-1.8704	0.0953315	0.487272	-4.7977
282	4	0	A_33_P3423506	NM_182495	120406	FAM55B	family with sequence similarity 55, member B	-0.436915	5.73658	-1.80296	0.106006	0.502047	-4.89341
208	36	0	A_32_P405902	NR_026755	54094	C21orf15	chromosome 21 open reading frame 15	-0.436801	6.9413	-1.55896	0.154551	0.560518	-5.22566
326	163	0	A_33_P3245922	NM_006724	4216	MAP3K4	mitogen-activated protein kinase kinase kinase 4	0.436692	11.0597	2.93167	0.0172966	0.301641	-3.18205
151	10	0	A_21_P0000051	NM_001164551	NA	DISC1	disrupted in schizophrenia 1	-0.436381	6.14875	-1.71532	0.121545	0.523377	-5.01545
200	26	0	A_33_P3220247	NM_001003818	117854	TRIM6	tripartite motif containing 6	0.436276	5.94024	1.62994	0.138673	0.544666	-5.13151
93	44	0	A_21_P0001583	TCONS_00001691	NA	XLOC_001046		0.436063	5.84854	1.29861	0.2274	0.625223	-5.54967
103	99	0	A_33_P3321682	A_33_P3321682	NA			0.43606	15.3208	4.57924	0.00144687	0.131307	-0.747282
48	45	0	A_19_P00805812	THC2535688	NA	Q5A5F0		0.435894	6.72265	1.12675	0.289932	0.667403	-5.74187
10	83	0	A_21_P0013161	THC2506834	NA	XLOC_l2_013153		0.435835	5.99849	1.02958	0.330948	0.692891	-5.84163
83	109	0	A_21_P0005564	TCONS_00014152	NA	XLOC_006124		0.435729	6.15744	0.956031	0.364835	0.71314	-5.91247
318	85	0	A_21_P0011347	ENST00000338567	NA	XLOC_l2_004840		-0.435688	6.78199	-10.9324	2.21397e-06	0.00265301	5.09537
163	54	0	A_33_P3397940	ENST00000380330	NA			0.435665	5.92168	1.02894	0.331231	0.693085	-5.84226
17	4	0	A_21_P0009828	ENST00000421788	NA	XLOC_013461		0.435467	5.82012	1.31721	0.221362	0.620327	-5.52776
73	114	0	A_21_P0014124	XR_108504	NA	LOC100507461	uncharacterized LOC100507461	0.435411	7.15337	1.31377	0.222471	0.621342	-5.53184
8	39	0	A_33_P3248638	NM_001001938	286223	C9orf47	chromosome 9 open reading frame 47	0.435406	6.08661	1.03731	0.327528	0.691167	-5.83394
142	101	0	A_33_P3329038	A_33_P3329038	NA			-0.435218	5.90955	-1.62399	0.139947	0.5456	-5.13949
12	162	0	A_21_P0000109	ENST00000544932	NA	MTRNR2L9		0.435025	12.7997	2.18419	0.057761	0.421682	-4.336
89	144	0	A_24_P344516	NR_003578	79986	ZNF702P	zinc finger protein 702, pseudogene	-0.43485	6.82971	-4.42643	0.00179321	0.14216	-0.957611
165	120	0	A_33_P3342563	NM_031220	83394	PITPNM3	PITPNM family member 3	-0.434813	7.66128	-3.55207	0.0065274	0.223533	-2.22804
208	60	0	A_23_P326303	NM_031936	83873	GPR61	G protein-coupled receptor 61	-0.434708	5.84007	-3.11811	0.0128539	0.279997	-2.89258
227	53	0	A_24_P326491	NM_173576	283078	MKX	mohawk homeobox	-0.43434	5.57198	-1.99073	0.0787611	0.460044	-4.62353
4	16	0	A_24_P117029	NM_000527	3949	LDLR	low density lipoprotein receptor	0.433875	12.5124	7.80471	3.24571e-05	0.017811	2.84077
82	149	0	A_33_P3764744	CV572371	NA			0.433618	5.93272	0.984458	0.351443	0.704554	-5.88558
105	130	0	A_33_P3299619	NM_001005236	26737	OR1L1	olfactory receptor, family 1, subfamily L, member 1	0.433386	5.9545	1.00661	0.341265	0.699261	-5.8642
197	76	0	A_24_P618401	NR_034121	100131067	LOC100131067	uncharacterized LOC100131067	-0.433347	6.93421	-2.03489	0.0734007	0.450332	-4.55864
359	98	0	A_23_P61524	NM_022903	64925	CCDC71	coiled-coil domain containing 71	0.433103	10.5946	1.29715	0.22788	0.625544	-5.55139
34	1	0	A_21_P0007342	TCONS_00019619	NA	XLOC_009418		0.43309	5.97809	1.5267	0.162293	0.568927	-5.2677
13	119	0	A_21_P0005963	XR_110876	NA	LOC100507420	uncharacterized LOC100507420	0.432771	6.09447	0.80028	0.444826	0.761926	-6.04821
146	88	0	A_33_P3236628	ENST00000378196	593	BCKDHA	branched chain keto acid dehydrogenase E1, alpha polypeptide	-0.43272	6.05093	-1.29283	0.229307	0.626358	-5.55645
253	144	0	A_33_P3423250	NM_001134888	388015	RTL1	retrotransposon-like 1	-0.432533	7.34777	-1.82133	0.102991	0.497192	-4.86748
216	57	0	A_21_P0009203	XM_003119692	NA	LOC100132174	uncharacterized LOC100132174	-0.43222	5.54773	-1.38788	0.199643	0.603099	-5.44267
234	158	0	A_19_P00803558	NM_002235	NA	KCNA6	potassium voltage-gated channel, shaker-related subfamily, member 6	-0.432174	6.6278	-3.35091	0.00891318	0.242969	-2.53403
258	108	0	A_33_P3255075	NM_032974	843	CASP10	caspase 10, apoptosis-related cysteine peptidase	-0.432066	5.4982	-1.90231	0.090641	0.48006	-4.75192
328	102	0	A_24_P923757	NM_018179	55729	ATF7IP	activating transcription factor 7 interacting protein	0.432047	9.43534	3.07595	0.013743	0.283437	-2.95791
320	140	0	A_33_P3366146	NM_001039465	6430	SRSF5	serine/arginine-rich splicing factor 5	0.431964	13.5969	1.08449	0.307248	0.67914	-5.78608
192	120	0	A_21_P0014105	ENST00000413820	NA	LOC100505565		0.431912	6.08687	2.2668	0.0505576	0.407921	-4.211
222	109	0	A_33_P3743432	AY746433	449491	DEFA8P	defensin, alpha 8 pseudogene	-0.431687	5.73972	-1.68004	0.128373	0.531693	-5.06375
246	83	0	A_23_P217621	NM_024885	54457	TAF7L	TAF7-like RNA polymerase II, TATA box binding protein (TBP)-associated factor, 50kDa	-0.431517	7.28617	-5.04796	0.000765172	0.102175	-0.125672
48	43	0	A_21_P0003561	TCONS_00007958	NA	XLOC_003430		0.431186	5.92686	1.03256	0.329627	0.692302	-5.83867
369	155	0	A_33_P3226135	THC2571723	NA			-0.43046	7.32518	-4.62199	0.00136339	0.128731	-0.689113
160	110	0	A_21_P0003676	TCONS_00008321	NA	XLOC_003777		-0.430333	5.68365	-1.52068	0.163775	0.569904	-5.27549
304	108	0	A_23_P346884	NM_014276	11317	RBPJL	recombination signal binding protein for immunoglobulin kappa J region-like	-0.430225	5.95547	-1.03507	0.328518	0.691775	-5.83618
119	51	0	A_33_P3358213	NM_207421	353238	PADI6	peptidyl arginine deiminase, type VI	-0.430127	5.87406	-1.78724	0.108649	0.505449	-4.91549
90	135	0	A_21_P0013001	ENST00000508339	NA	XLOC_l2_012159		0.43006	6.13822	0.881288	0.401825	0.736272	-5.98011
65	134	0	A_21_P0007058	AA398971	NA	XLOC_008473		0.429907	5.76454	0.864738	0.410364	0.741821	-5.99447
363	14	0	A_23_P426305	NM_003734	8639	AOC3	amine oxidase, copper containing 3 (vascular adhesion protein 1)	-0.429871	7.90522	-4.09981	0.00286943	0.170231	-1.41941
67	89	0	A_24_P274270	NM_139266	6772	STAT1	signal transducer and activator of transcription 1, 91kDa	-0.429644	9.34541	-4.16603	0.00260535	0.165025	-1.32448
100	78	0	A_33_P3264533	A_33_P3264533	NA			0.429348	5.87289	0.953792	0.365906	0.713641	-5.91456
248	38	0	A_33_P3665553	AK126241	100233156	LOC100233156	tektin 4 pseudogene	-0.429337	7.69573	-3.94744	0.00359174	0.183229	-1.6403
238	138	0	A_23_P108734	NM_018436	55821	ALLC	allantoicase	-0.429291	7.54297	-5.1433	0.000674794	0.0971124	-0.0036263
195	149	0	A_21_P0004780	ENST00000455535	NA	XLOC_005855		-0.429287	5.6072	-1.54833	0.157066	0.562446	-5.23957
138	76	0	A_21_P0005566	TCONS_00014160	NA	XLOC_006138		0.429242	6.28346	0.973846	0.356399	0.707703	-5.89569
214	70	0	A_21_P0000136	NM_001197184	NA	GPR33	G protein-coupled receptor 33 (gene/pseudogene)	-0.429196	5.86848	-1.21424	0.25655	0.645436	-5.64642
189	107	0	A_24_P911094	ENST00000376439	11159	RABL2A	RAB, member of RAS oncogene family-like 2A	-0.429187	7.88561	-1.64138	0.136258	0.54169	-5.11613
216	21	0	A_21_P0007984	ENST00000416261	NA	XLOC_010556		-0.428755	5.75465	-1.19534	0.263483	0.649793	-5.66747
14	76	0	A_23_P35045	NM_001025598	257106	ARHGAP30	Rho GTPase activating protein 30	0.428721	6.47471	0.755337	0.469977	0.774197	-6.08355
14	32	0	A_24_P412156	NM_000609	6387	CXCL12	chemokine (C-X-C motif) ligand 12	0.42871	6.77073	0.934601	0.375177	0.720052	-5.93232
256	144	0	A_33_P3265494	NM_001013732	442213	C6orf138	chromosome 6 open reading frame 138	-0.428624	6.47184	-1.44607	0.183161	0.588813	-5.37054
174	50	0	A_23_P217528	NM_007250	11279	KLF8	Kruppel-like factor 8	0.428388	5.60935	2.10649	0.0654469	0.437298	-4.45245
31	22	0	A_33_P3328410	ENST00000309775	NA			0.428347	6.04348	1.05825	0.318404	0.686155	-5.8129
316	62	0	A_23_P1102	NM_001100	58	ACTA1	actin, alpha 1, skeletal muscle	-0.428332	8.07071	-3.3336	0.00915732	0.246301	-2.56053
320	15	0	A_33_P3382498	NM_001098612	100049587	SIGLEC14	sialic acid binding Ig-like lectin 14	-0.42832	6.50692	-4.88701	0.000948854	0.114638	-0.335078
189	17	0	A_33_P3405509	ENST00000379029	347541	MAGEB5	melanoma antigen family B, 5	-0.428281	5.78461	-0.759137	0.467815	0.773384	-6.08063
281	87	0	A_33_P3406090	A_33_P3406090	NA			0.428062	8.13858	8.37395	1.87699e-05	0.0128303	3.32516
13	111	0	A_21_P0005488	TCONS_00013775	NA	XLOC_006407		0.428045	5.71673	0.802985	0.443341	0.760893	-6.04602
240	42	0	A_23_P406928	ENST00000361567	4540	ND5	NADH dehydrogenase, subunit 5 (complex I)	0.427898	13.7385	3.67256	0.00542911	0.210001	-2.04684
83	37	0	A_21_P0012025	ENST00000413525	NA	XLOC_l2_007585		0.427816	6.24883	0.853822	0.416066	0.745039	-6.00382
88	58	0	A_24_P415680	NM_015978	51086	TNNI3K	TNNI3 interacting kinase	0.427715	5.82874	1.13128	0.288119	0.665971	-5.73704
158	37	0	A_33_P3354514	BC047507	114134	SLC2A13	solute carrier family 2 (facilitated glucose transporter), member 13	-0.427337	6.08276	-2.22451	0.054128	0.413529	-4.27514
222	11	0	A_24_P38290	NM_003182	6863	TAC1	tachykinin, precursor 1	-0.427316	5.66645	-1.07073	0.313062	0.682277	-5.80021
170	67	0	A_23_P121545	NM_201591	2823	GPM6A	glycoprotein M6A	-0.427313	6.34278	-1.75442	0.114368	0.513727	-4.96134
59	113	0	A_33_P3305243	ENST00000373903	5711	PSMD5	proteasome (prosome, macropain) 26S subunit, non-ATPase, 5	-0.427287	6.63233	-4.03125	0.00317321	0.175359	-1.51839
279	126	0	A_21_P0000430	NR_003230	NA	SNORD113-2	small nucleolar RNA, C/D box 113-2	-0.42723	5.5753	-1.64888	0.134696	0.539916	-5.10603
36	2	0	A_33_P3410060	ENST00000418322	284076	TTLL6	tubulin tyrosine ligase-like family, member 6	0.426944	5.96767	1.21311	0.256958	0.645745	-5.64768
275	6	0	A_21_P0013015	TCONS_l2_00024038	NA	XLOC_l2_012397		-0.426854	5.82413	-1.05813	0.318454	0.686165	-5.81302
304	84	0	A_33_P3318606	BC034544	25759	SHC2	SHC (Src homology 2 domain containing) transforming protein 2	0.426845	7.81453	2.86016	0.0193963	0.308726	-3.29337
222	94	0	A_23_P357316	NM_173355	151531	UPP2	uridine phosphorylase 2	-0.426797	5.85753	-1.48889	0.171801	0.577648	-5.31633
177	21	0	A_23_P107132	NM_002903	5957	RCVRN	recoverin	-0.426778	5.77098	-1.26628	0.238228	0.633133	-5.58727
42	14	0	A_33_P3370217	ENST00000375325	NA			0.42655	5.77316	0.915072	0.384786	0.726082	-5.95009
365	149	0	A_33_P3379486	AK127427	100130581	LOC100130581	uncharacterized LOC100130581	0.426336	5.8429	1.94186	0.0851314	0.470196	-4.69476
155	127	0	A_24_P666105	NM_001134745	80059	LRRTM4	leucine rich repeat transmembrane neuronal 4	-0.426292	6.29936	-1.16325	0.275605	0.657998	-5.70267
139	100	0	A_24_P118052	NM_199254	93492	TPTE2	transmembrane phosphoinositide 3-phosphatase and tensin homolog 2	0.426168	5.79722	1.40937	0.193413	0.598538	-5.41625
236	11	0	A_23_P164927	NM_012451	23546	SYNGR4	synaptogyrin 4	0.426157	10.3975	6.32538	0.000157567	0.0472035	1.38834
34	151	0	A_32_P70203	NR_027055	284593	FAM41C	family with sequence similarity 41, member C	0.425959	6.07311	0.951617	0.366948	0.714465	-5.91659
104	137	0	A_21_P0008786	TCONS_00023797	NA	XLOC_011590		0.425938	7.21425	1.89113	0.0922585	0.482296	-4.76799
268	118	0	A_21_P0010412	TCONS_00029584	NA	XLOC_014218		-0.425929	5.82632	-1.09909	0.301176	0.675419	-5.77095
189	60	0	A_21_P0009380	TCONS_00025844	NA	XLOC_012115		-0.425891	6.34197	-1.99211	0.0785889	0.45959	-4.62152
89	35	0	A_23_P301053	NM_020459	400961	PAIP2B	poly(A) binding protein interacting protein 2B	0.425848	6.69289	1.46455	0.17818	0.584335	-5.34726
13	151	0	A_33_P3408034	A_33_P3408034	NA			0.425572	6.53979	1.17245	0.272083	0.655663	-5.69265
197	13	0	A_33_P3350753	NM_014695	9720	CCDC144A	coiled-coil domain containing 144A	-0.425271	5.57833	-1.20872	0.258557	0.646766	-5.65258
107	28	0	A_21_P0009957	DA674107	NA	XLOC_013531		0.425169	5.74884	1.42542	0.188869	0.593864	-5.39635
81	150	0	A_23_P30913	NM_033554	3113	HLA-DPA1	major histocompatibility complex, class II, DP alpha 1	0.425139	6.40454	1.28791	0.230939	0.627707	-5.56219
37	133	0	A_33_P3285354	NM_001144936	65998	C11orf95	chromosome 11 open reading frame 95	0.425093	9.55842	4.06276	0.00302954	0.173547	-1.47282
368	116	0	A_23_P110184	NM_006745	6307	MSMO1	methylsterol monooxygenase 1	0.425003	8.34715	3.77588	0.00464274	0.19969	-1.89288
131	47	0	A_21_P0008539	TCONS_00023122	NA	XLOC_011056		0.424718	5.76654	0.839465	0.423648	0.749599	-6.01596
38	101	0	A_33_P3232203	ENST00000478615	6295	SAG	S-antigen; retina and pineal gland (arrestin)	0.424602	5.84122	1.21683	0.255608	0.64478	-5.64351
144	102	0	A_21_P0008809	TCONS_00023857	NA	XLOC_011172		-0.424491	5.64597	-3.00308	0.0154323	0.292681	-3.07101
41	79	0	A_23_P317756	NM_202000	6296	ACSM3	acyl-CoA synthetase medium-chain family member 3	0.424487	6.08872	0.882219	0.401348	0.736212	-5.97929
159	91	0	A_21_P0008321	BC008699	NA	XLOC_010803		-0.424448	5.74564	-1.62736	0.139224	0.545037	-5.13497
104	20	0	A_32_P42537	NR_034116	100129407	LOC100129407	uncharacterized LOC100129407	0.424007	5.81291	1.12333	0.291301	0.668475	-5.74549
376	59	0	A_23_P12405	NM_031475	83715	ESPN	espin	-0.423776	6.44425	-1.20219	0.260953	0.648429	-5.65987
234	143	0	A_23_P2501	NM_000277	5053	PAH	phenylalanine hydroxylase	-0.423748	5.46857	-1.60782	0.143458	0.549191	-5.16109
1	113	0	A_21_P0005597	TCONS_00014261	NA	XLOC_006364		0.423642	8.75529	4.61818	0.00137062	0.128972	-0.694285
194	142	0	A_21_P0009111	TCONS_00024886	NA	XLOC_011785		-0.423403	5.73899	-1.49931	0.169134	0.575896	-5.303
104	104	0	A_33_P3272184	NR_027434	100131532	LOC100131532	uncharacterized LOC100131532	0.423393	5.64346	2.10318	0.0657954	0.437957	-4.45739
81	126	0	A_21_P0006426	ENST00000454388	NA	XLOC_008013		0.423332	6.03985	1.4679	0.177291	0.583193	-5.34302
326	95	0	A_23_P100991	NM_006771	8687	KRT38	keratin 38	-0.42333	5.53304	-1.31665	0.221544	0.620583	-5.52843
271	38	0	A_33_P3323368	NR_033904	283876	FLJ39639	uncharacterized protein FLJ39639	-0.423222	6.19979	-1.25994	0.240399	0.635108	-5.59457
121	37	0	A_23_P115519	NM_032563	84648	LCE3D	late cornified envelope 3D	0.422591	5.92954	1.50719	0.16714	0.57358	-5.29288
122	45	0	A_33_P3247331	ENST00000345015	3784	KCNQ1	potassium voltage-gated channel, KQT-like subfamily, member 1	0.422583	5.73173	1.13147	0.288044	0.665971	-5.73684
80	118	0	A_24_P717262	A_24_P717262	NA			0.422502	6.47995	1.03037	0.330597	0.692655	-5.84084
237	29	0	A_23_P101683	NM_001828	1178	CLC	Charcot-Leyden crystal protein	-0.422464	5.80568	-1.20778	0.2589	0.646914	-5.65363
207	145	0	A_23_P46222	ENST00000368385	80128	TRIM46	tripartite motif containing 46	0.422461	9.08488	3.80436	0.00444786	0.196809	-1.85068
170	110	0	A_33_P3276053	BU428864	8994	LIMD1	LIM domains containing 1	-0.422235	6.02716	-1.75912	0.113533	0.512557	-4.9548
336	158	0	A_23_P63896	NM_000043	355	FAS	Fas (TNF receptor superfamily, member 6)	-0.422156	7.64921	-6.22911	0.00017617	0.0507067	1.28312
10	150	0	A_33_P3352718	ENST00000377158	400073	C12orf76	chromosome 12 open reading frame 76	0.422134	6.12027	1.14027	0.284558	0.662965	-5.72746
309	52	0	A_32_P47988	NM_001221	817	CAMK2D	calcium/calmodulin-dependent protein kinase II delta	-0.422129	7.52625	-1.44192	0.184295	0.590391	-5.37574
272	145	0	A_23_P63896	NM_000043	355	FAS	Fas (TNF receptor superfamily, member 6)	-0.421937	7.78962	-7.37689	5.0015e-05	0.0234938	2.45085
156	35	0	A_33_P3296721	A_33_P3296721	NA			-0.421884	6.26825	-1.33088	0.217013	0.617955	-5.51154
131	41	0	A_23_P70719	NM_000426	3908	LAMA2	laminin, alpha 2	-0.421689	5.86317	-1.07594	0.310849	0.680716	-5.79487
146	103	0	A_32_P185628	A_32_P185628	NA			0.421679	6.76919	0.97429	0.356191	0.707686	-5.89527
135	29	0	A_33_P3223417	NR_028137	286002	LOC286002	uncharacterized LOC286002	0.421495	5.82456	1.7057	0.123373	0.525338	-5.02867
137	125	0	A_23_P382835	NM_002563	5028	P2RY1	purinergic receptor P2Y, G-protein coupled, 1	0.421179	6.29501	0.730275	0.484399	0.782343	-6.10249
167	162	0	A_21_P0005311	ENST00000441691	NA	XLOC_006468		-0.421128	5.77255	-1.72044	0.120582	0.521855	-5.00839
144	151	0	A_33_P3333089	NR_038388	729444	LOC729444	uncharacterized LOC729444	-0.420973	5.83344	-3.22143	0.0109187	0.264902	-2.73296
182	37	0	A_24_P3045	NM_032974	843	CASP10	caspase 10, apoptosis-related cysteine peptidase	-0.420967	5.47517	-2.51352	0.0339241	0.361264	-3.83227
19	42	0	A_23_P218358	NM_031456	10517	FBXW10	F-box and WD repeat domain containing 10	-0.420753	6.91542	-5.67576	0.000342393	0.0688502	0.650781
169	147	0	A_32_P106194	NM_153229	162461	TMEM92	transmembrane protein 92	-0.420687	6.28709	-1.37948	0.202127	0.605313	-5.45295
56	54	0	A_23_P65518	NM_016651	51339	DACT1	dapper, antagonist of beta-catenin, homolog 1 (Xenopus laevis)	-0.420455	7.0295	-6.93217	8.00189e-05	0.0328564	2.02029
15	38	0	A_33_P3341399	NM_198529	374786	EFCAB5	EF-hand calcium binding domain 5	0.420266	6.11096	0.996973	0.345665	0.701872	-5.87355
230	150	0	A_23_P103588	NM_005518	3158	HMGCS2	3-hydroxy-3-methylglutaryl-CoA synthase 2 (mitochondrial)	-0.420159	5.73141	-1.43062	0.187418	0.592505	-5.38987
94	20	0	A_33_P3398840	NM_001171135	9189	ZBED1	zinc finger, BED-type containing 1	0.419578	8.76976	2.17198	0.0589078	0.423724	-4.35438
217	49	0	A_33_P3441583	BM453041	653464	SRGAP2P1	SLIT-ROBO Rho GTPase activating protein 2 pseudogene 1	0.419376	14.9826	5.98469	0.000235111	0.0575542	1.00966
289	118	0	A_23_P63896	NM_000043	355	FAS	Fas (TNF receptor superfamily, member 6)	-0.419325	7.90937	-6.67548	0.000106017	0.0389063	1.7594
124	31	0	A_21_P0001267	ENST00000475078	NA	C1orf144	chromosome 1 open reading frame 144	0.41926	6.68797	6.00877	0.000228441	0.0575118	1.03702
235	144	0	A_33_P3306264	NM_014400	27076	LYPD3	LY6/PLAUR domain containing 3	-0.419124	6.80261	-1.36806	0.205542	0.608338	-5.46682
32	157	0	A_21_P0013254	ENST00000418395	NA	XLOC_l2_013506		0.419067	6.97256	3.19403	0.0114003	0.268113	-2.77521
148	69	0	A_21_P0011748	TCONS_l2_00013122	NA	XLOC_l2_007058		0.419048	5.99012	0.923606	0.380565	0.723576	-5.94237
37	11	0	A_21_P0002070	ENST00000455845	NA	XLOC_002183		0.418983	5.67781	1.00453	0.34221	0.700026	-5.86622
91	43	0	A_33_P3322892	ENST00000320893	83692	CD99L2	CD99 molecule-like 2	0.418959	5.83222	1.20974	0.258184	0.646555	-5.65144
285	62	0	A_33_P3418170	NM_014314	23586	DDX58	DEAD (Asp-Glu-Ala-Asp) box polypeptide 58	-0.418423	8.71197	-5.88823	0.000264031	0.0603228	0.89922
76	149	0	A_21_P0009812	BX648826	NA	XLOC_013545		0.418389	5.69504	1.07808	0.309948	0.680456	-5.79269
36	151	0	A_32_P134007	NM_052898	114786	XKR4	XK, Kell blood group complex subunit-related family, member 4	0.418347	5.96515	1.08781	0.305859	0.678341	-5.78265
1	90	0	A_19_P00811812	NM_201274	NA	MPRIP	myosin phosphatase Rho interacting protein	-0.418229	7.8865	-2.1126	0.0648083	0.436538	-4.44334
331	14	0	A_33_P3345414	ENST00000373626	6191	RPS4X	ribosomal protein S4, X-linked	0.418205	7.62067	4.15927	0.00263106	0.1651	-1.33413
284	26	0	A_24_P82880	NM_003290	7171	TPM4	tropomyosin 4	0.418071	13.8776	3.03293	0.0147157	0.288715	-3.02465
329	61	0	A_23_P78108	NM_005165	230	ALDOC	aldolase C, fructose-bisphosphate	0.417761	11.2914	7.9229	2.88953e-05	0.0169665	2.9445
129	157	0	A_21_P0014234	XR_133523	NA	LOC100506897		-0.417701	6.30818	-3.82512	0.00431127	0.195781	-1.81999
219	130	0	A_33_P3310974	BX640643	653857	ACTR3C	ARP3 actin-related protein 3 homolog C (yeast)	-0.417691	5.91221	-1.81206	0.104503	0.499887	-4.88059
320	10	0	A_23_P11859	NM_016371	51478	HSD17B7	hydroxysteroid (17-beta) dehydrogenase 7	0.417642	9.86268	4.34251	0.00202048	0.14876	-1.07471
141	102	0	A_21_P0012296	TCONS_l2_00017993	NA	XLOC_l2_009510		-0.417622	5.72369	-1.77184	0.111299	0.509021	-4.93706
52	43	0	A_21_P0002131	ENST00000456248	NA	XLOC_002449		0.417458	6.09056	1.08499	0.307039	0.678984	-5.78557
137	124	0	A_21_P0009238	TCONS_00025353	NA	XLOC_012174		0.417198	5.84759	1.07059	0.313122	0.682277	-5.80036
185	62	0	A_23_P47019	NM_004190	8513	LIPF	lipase, gastric	-0.41704	5.69546	-1.41393	0.192111	0.59746	-5.4106
313	142	0	A_32_P18470	NM_001012979	340543	TCEAL5	transcription elongation factor A (SII)-like 5	0.417022	13.7755	2.22562	0.0540314	0.413529	-4.27346
214	69	0	A_21_P0012879	DA338254	NA	XLOC_l2_011901		-0.416719	6.35904	-1.72223	0.120246	0.521109	-5.00592
326	98	0	A_21_P0002558	TCONS_00004641	NA	XLOC_002554		-0.416704	6.73201	-10.2577	3.71864e-06	0.00383066	4.68538
12	16	0	A_21_P0006828	TCONS_00018111	NA	XLOC_008372		0.416526	5.89978	1.18889	0.265881	0.651011	-5.67459
7	111	0	A_21_P0000842	NR_038927	NA	LOC100506660	uncharacterized LOC100506660	0.416338	7.04496	1.3431	0.213183	0.614836	-5.49693
237	122	0	A_33_P3795644	AJ011409	54748	C21orf104	chromosome 21 open reading frame 104	-0.416266	6.25091	-6.62037	0.00011273	0.0403608	1.70218
251	22	0	A_21_P0003331	ENST00000418666	NA	XLOC_003427		-0.416197	5.8495	-1.97783	0.0803977	0.462172	-4.6424
161	105	0	A_23_P1102	NM_001100	58	ACTA1	actin, alpha 1, skeletal muscle	-0.416039	8.30787	-4.19943	0.0024821	0.161756	-1.27684
82	4	0	A_33_P3302736	NM_001166012	100101467	ZSCAN30	zinc finger and SCAN domain containing 30	0.415973	7.69096	5.82263	0.000285909	0.0624078	0.823267
101	28	0	A_21_P0012848	TCONS_l2_00022505	NA	XLOC_l2_011744		0.415691	5.86782	0.940119	0.372494	0.718369	-5.92725
222	52	0	A_21_P0002408	TCONS_00004157	NA	XLOC_002003		-0.415573	5.44301	-2.02113	0.0750324	0.45217	-4.57891
35	109	0	A_33_P3364023	ENST00000473249	NA			0.415565	5.91401	1.08862	0.305522	0.67821	-5.78182
260	3	0	A_32_P170397	ENST00000309874	100289090	LOC100289090	uncharacterized protein LOC100289090	-0.415474	6.60892	-1.29754	0.227753	0.625462	-5.55093
173	111	0	A_23_P397120	NM_001136503	284422	C19orf77	chromosome 19 open reading frame 77	-0.415402	6.27871	-3.38294	0.00847919	0.23929	-2.48504
148	59	0	A_24_P299210	ENST00000262676	22996	TTC39A	tetratricopeptide repeat domain 39A	0.415014	6.05604	1.32038	0.220346	0.619833	-5.52401
39	88	0	A_23_P63896	NM_000043	355	FAS	Fas (TNF receptor superfamily, member 6)	-0.41474	8.04311	-8.18284	2.24827e-05	0.0146679	3.16675
239	94	0	A_33_P3268124	NM_018293	55279	ZNF654	zinc finger protein 654	-0.414285	9.07476	-4.19584	0.00249506	0.16206	-1.28196
321	96	0	A_33_P3381177	ENST00000390307	NA			-0.414237	5.73967	-1.2281	0.25156	0.641625	-5.63084
2	114	0	A_24_P401090	A_24_P401090	NA			0.414211	8.57553	1.58733	0.14802	0.553599	-5.1883
223	128	0	A_23_P1691	NM_002421	4312	MMP1	matrix metallopeptidase 1 (interstitial collagenase)	-0.413973	5.85077	-2.48496	0.0355289	0.366634	-3.87643
227	100	0	A_21_P0001915	ENST00000444649	NA	XLOC_001682		-0.413875	5.71655	-2.55912	0.0315117	0.355117	-3.76164
340	143	0	A_24_P243396	NM_001008657	6949	TCOF1	Treacher Collins-Franceschetti syndrome 1	-0.413796	10.2739	-8.15574	2.30718e-05	0.0148869	3.14395
310	137	0	A_33_P3362239	A_33_P3362239	NA			0.413633	8.94874	0.922185	0.381266	0.723858	-5.94366
182	32	0	A_23_P103703	NM_014424	27129	HSPB7	heat shock 27kDa protein family, member 7 (cardiovascular)	-0.413594	5.96189	-1.27015	0.236908	0.632125	-5.5828
116	25	0	A_21_P0004642	NR_026791	NA	HCG27	HLA complex group 27 (non-protein coding)	0.413573	5.93057	1.28751	0.231072	0.627815	-5.56266
41	27	0	A_21_P0008845	TCONS_00024099	NA	XLOC_011448		0.413295	6.8615	1.20157	0.261179	0.648552	-5.66055
67	161	0	A_33_P3299590	NM_001128854	51593	SRRT	serrate RNA effector molecule homolog (Arabidopsis)	0.413267	11.0798	3.40267	0.00822284	0.237138	-2.4549
127	17	0	A_21_P0009773	TCONS_00027385	NA	XLOC_013370		0.413231	6.72014	1.70671	0.12318	0.525174	-5.02728
50	144	0	A_23_P108657	NM_152528	151525	WDSUB1	WD repeat, sterile alpha motif and U-box domain containing 1	0.413074	9.43803	1.27664	0.234711	0.630515	-5.57529
169	66	0	A_21_P0004613	ENST00000455071	NA	XLOC_005777		0.412865	5.87558	1.16088	0.276515	0.658453	-5.70524
299	49	0	A_33_P3247678	XR_109361	100130876	LOC100130876	uncharacterized LOC100130876	-0.412814	7.8583	-2.80045	0.0213489	0.318143	-3.38637
129	108	0	A_33_P3240148	AK127068	100131101	LOC100131101	uncharacterized LOC100131101	0.412725	5.8613	0.939902	0.372599	0.718391	-5.92745
31	164	0	A_21_P0003726	BC036878	NA	XLOC_003898		0.412454	6.12978	1.17863	0.269739	0.653718	-5.68589
278	7	0	A_24_P286114	NM_004172	6507	SLC1A3	solute carrier family 1 (glial high affinity glutamate transporter), member 3	-0.412353	5.82863	-1.54069	0.158894	0.564619	-5.24952
281	19	0	A_21_P0009216	TCONS_00025294	NA	XLOC_012099		-0.412222	6.39892	-0.954074	0.365771	0.713624	-5.9143
304	121	0	A_24_P161144	NM_001136509	283933	ZNF843	zinc finger protein 843	0.412158	9.10961	3.61621	0.00591629	0.215768	-2.13137
306	111	0	A_23_P41470	NM_017631	55601	DDX60	DEAD (Asp-Glu-Ala-Asp) box polypeptide 60	-0.411713	7.3699	-3.75052	0.00482388	0.201941	-1.93055
351	67	0	A_21_P0005473	TCONS_00013713	NA	XLOC_006364		0.411692	9.13772	4.18458	0.0025361	0.162746	-1.298
124	107	0	A_24_P416997	NM_145641	80833	APOL3	apolipoprotein L, 3	0.411367	5.9215	1.91295	0.0891266	0.477723	-4.73659
238	116	0	A_23_P164196	NM_138281	1748	DLX4	distal-less homeobox 4	-0.411324	7.0074	-1.16003	0.276843	0.65852	-5.70616
26	157	0	A_21_P0003385	ENST00000515649	NA	XLOC_003633		-0.411212	6.07697	-1.95611	0.0832245	0.467	-4.67405
290	96	0	A_33_P3231277	NM_181054	3091	HIF1A	hypoxia inducible factor 1, alpha subunit (basic helix-loop-helix transcription factor)	-0.411183	10.5265	-2.32242	0.0462132	0.395638	-4.12625
12	87	0	A_32_P153071	NM_003382	7434	VIPR2	vasoactive intestinal peptide receptor 2	0.411148	7.05863	1.37292	0.204083	0.607357	-5.46093
160	114	0	A_21_P0006774	ENST00000421256	NA	XLOC_008867		-0.410836	5.84791	-1.87284	0.0949645	0.486607	-4.79421
57	160	0	A_24_P212819	AK057884	NA			0.410829	13.5459	1.79312	0.107654	0.504557	-4.90725
145	54	0	A_21_P0004544	TCONS_00010853	NA	XLOC_004670		0.410803	5.76934	1.26962	0.237087	0.63222	-5.58341
108	98	0	A_21_P0005353	TCONS_00013326	NA	XLOC_005972		-0.410783	5.89955	-1.24752	0.244703	0.637775	-5.60879
165	135	0	A_23_P117387	NM_054024	117153	MIA2	melanoma inhibitory activity 2	-0.410715	5.83379	-2.16754	0.0593303	0.424984	-4.36105
258	4	0	A_33_P3398406	NM_004246	9340	GLP2R	glucagon-like peptide 2 receptor	-0.410655	5.7694	-1.55683	0.155052	0.560541	-5.22845
268	90	0	A_33_P3369441	NR_024237	100132111	LOC100132111	uncharacterized LOC100132111	-0.410578	5.73153	-0.972282	0.357134	0.708082	-5.89718
144	84	0	A_21_P0006917	TCONS_00018343	NA	XLOC_008624		-0.410576	6.0909	-2.37576	0.0423948	0.385519	-4.04459
339	93	0	A_21_P0004750	BC035191	NA	XLOC_005737		0.410491	9.04987	2.00718	0.0767217	0.456236	-4.59941
187	52	0	A_21_P0012468	NR_033945	NA	LOC647107	uncharacterized LOC647107	-0.410465	5.92946	-1.78357	0.109276	0.50633	-4.92064
252	69	0	A_23_P427516	NM_020525	50616	IL22	interleukin 22	-0.410463	5.67672	-1.91755	0.0884786	0.476634	-4.72994
196	28	0	A_21_P0003485	ENST00000515728	NA	XLOC_004024		-0.409735	5.4086	-1.08916	0.305295	0.678143	-5.78126
183	19	0	A_19_P00316667	ENST00000517491	NA	XLOC_006756		-0.409698	6.4277	-0.910257	0.387182	0.727597	-5.95443
7	55	0	A_23_P122863	NM_001001555	2887	GRB10	growth factor receptor-bound protein 10	0.409599	6.5484	1.83288	0.101138	0.494953	-4.85113
197	78	0	A_21_P0002905	ENST00000470523	NA	XLOC_003321		-0.409026	5.55032	-3.0536	0.0142396	0.286324	-2.99257
372	121	0	A_23_P2492	NM_001734	716	C1S	complement component 1, s subcomponent	-0.408615	7.42068	-5.6827	0.000339469	0.0687037	0.659001
252	130	0	A_21_P0005775	ENST00000523604	NA	XLOC_006946		-0.408611	6.28366	-1.5813	0.149386	0.554737	-5.19627
8	160	0	A_21_P0006512	TCONS_00017234	NA	XLOC_008054		0.408597	5.93747	1.45228	0.181474	0.586971	-5.36274
188	28	0	A_19_P00321628	NR_038301	NA	LOC100505687	uncharacterized LOC100505687	0.40836	13.4231	3.43269	0.00784837	0.234282	-2.40914
230	85	0	A_23_P32847	NM_001510	2895	GRID2	glutamate receptor, ionotropic, delta 2	-0.408353	6.21042	-1.37765	0.202671	0.606031	-5.45518
139	21	0	A_33_P3260680	NM_001004696	127074	OR2T4	olfactory receptor, family 2, subfamily T, member 4	0.40817	6.24665	0.843995	0.421246	0.748344	-6.01215
272	90	0	A_21_P0004791	ENST00000456715	NA	XLOC_005881		-0.408138	5.65235	-0.971995	0.357269	0.708109	-5.89745
86	62	0	A_23_P155979	NM_001963	1950	EGF	epidermal growth factor	0.408128	5.66605	0.957106	0.364322	0.712778	-5.91147
96	48	0	A_21_P0006406	L23866	NA	XLOC_008094		0.407968	6.43215	1.08676	0.306299	0.678475	-5.78374
189	91	0	A_21_P0012524	NR_037891	NA	LOC100507391	uncharacterized LOC100507391	-0.407852	5.94764	-2.13841	0.0621763	0.430589	-4.40476
110	101	0	A_21_P0006859	TCONS_00018165	NA	XLOC_008456		0.4076	5.96046	1.0767	0.31053	0.680716	-5.7941
34	124	0	A_33_P3312564	A_33_P3312564	NA			0.407476	13.0779	1.16314	0.275647	0.657998	-5.70279
12	39	0	A_21_P0012058	ENST00000449391	NA	XLOC_l2_007928		0.407321	6.40535	0.971424	0.357537	0.708192	-5.89799
215	76	0	A_33_P3264424	A_33_P3264424	NA			0.40721	9.20005	4.24029	0.00233974	0.158104	-1.2188
150	75	0	A_21_P0010523	TCONS_l2_00000171	NA	XLOC_l2_000116		-0.407144	5.77311	-1.41093	0.192966	0.598075	-5.41432
10	124	0	A_21_P0010235	TCONS_00029002	NA	XLOC_013917		0.40706	6.36946	1.09572	0.302571	0.676094	-5.77446
246	77	0	A_33_P3263359	ENST00000546995	1606	DGKA	diacylglycerol kinase, alpha 80kDa	0.407005	7.70646	8.70943	1.37805e-05	0.0101585	3.59342
269	90	0	A_21_P0002487	TCONS_00004371	NA	XLOC_002256		-0.407002	5.87817	-1.1945	0.263793	0.649887	-5.66839
63	65	0	A_32_P37592	NR_003003	677769	SCARNA17	small Cajal body-specific RNA 17	0.406892	9.00514	5.21489	0.000614545	0.0923612	0.0870347
74	139	0	A_23_P120281	NM_022336	10913	EDAR	ectodysplasin A receptor	0.406801	5.69633	1.15864	0.277382	0.658774	-5.70767
9	124	0	A_33_P3248231	AK092783	283028	LOC283028	uncharacterized LOC283028	0.406677	8.95668	6.06378	0.000213967	0.0563386	1.09916
254	3	0	A_23_P10182	NM_003500	8309	ACOX2	acyl-CoA oxidase 2, branched chain	-0.406542	6.24415	-1.41639	0.191415	0.597072	-5.40756
292	127	0	A_33_P3379001	NM_133369	90249	UNC5A	unc-5 homolog A (C. elegans)	0.406293	7.93254	2.30478	0.0475495	0.398907	-4.15317
232	32	0	A_33_P3270109	NM_138792	123169	LEO1	Leo1, Paf1/RNA polymerase II complex component, homolog (S. cerevisiae)	0.406246	12.4309	3.00769	0.0153194	0.29167	-3.06385
243	57	0	A_21_P0009468	TCONS_00026300	NA	XLOC_012645		-0.406081	5.68886	-1.35623	0.209134	0.610871	-5.48114
359	33	0	A_33_P3421733	NM_001199142	8663	EIF3C	eukaryotic translation initiation factor 3, subunit C	0.405911	12.1259	5.95816	0.000242703	0.0583344	0.979437
44	122	0	A_33_P3338006	A_33_P3338006	NA			0.405503	5.71792	1.12666	0.289966	0.667403	-5.74196
203	49	0	A_33_P3281816	NM_006367	10487	CAP1	CAP, adenylate cyclase-associated protein 1 (yeast)	0.405241	11.2083	4.27093	0.00223872	0.155655	-1.17544
5	84	0	A_21_P0005086	TCONS_00012359	NA	XLOC_005919		0.405225	6.01949	1.11135	0.29615	0.672193	-5.75812
83	150	0	A_21_P0004290	TCONS_00010079	NA	XLOC_004536		0.405216	5.98885	1.17526	0.271017	0.654798	-5.68958
115	132	0	A_23_P212126	NM_080538	8292	COLQ	collagen-like tail subunit (single strand of homotrimer) of asymmetric acetylcholinesterase	-0.405157	6.97969	-6.5147	0.000126943	0.0428071	1.59122
351	69	0	A_21_P0002751	ENST00000494761	NA	XLOC_002706		-0.405125	5.58524	-1.02628	0.332416	0.693679	-5.8449
113	62	0	A_33_P3400578	NM_002126	3131	HLF	hepatic leukemia factor	-0.405089	8.44662	-6.84969	8.75177e-05	0.0347215	1.93746
129	6	0	A_33_P3223378	ENST00000448102	NA			0.405059	5.94455	0.914437	0.385101	0.726256	-5.95067
127	146	0	A_21_P0001934	ENST00000432133	NA	XLOC_001744		-0.404879	5.72854	-1.68658	0.127082	0.530292	-5.05484
158	42	0	A_23_P38735	NM_021153	28513	CDH19	cadherin 19, type 2	-0.404718	5.99951	-1.54738	0.157292	0.562674	-5.24081
322	135	0	A_23_P101185	NM_004539	4677	NARS	asparaginyl-tRNA synthetase	0.404667	13.3698	1.16462	0.275077	0.657868	-5.70118
166	72	0	A_23_P253350	NM_020130	56892	C8orf4	chromosome 8 open reading frame 4	-0.404333	5.72321	-1.41223	0.192595	0.597835	-5.41271
213	145	0	A_33_P3228647	NM_030946	442191	OR14J1	olfactory receptor, family 14, subfamily J, member 1	-0.404136	5.63484	-2.17426	0.0586925	0.423009	-4.35096
186	59	0	A_33_P3229789	ENST00000376271	NA			-0.404007	6.81516	-1.41136	0.192844	0.598006	-5.41379
92	30	0	A_21_P0005335	ENST00000453087	NA	XLOC_006611		0.403934	8.04895	1.74311	0.116403	0.515895	-4.97705
128	16	0	A_21_P0000695	NR_037867	NA	LOC731424	uncharacterized LOC731424	0.403594	5.87267	0.97258	0.356994	0.707983	-5.89689
88	43	0	A_21_P0011907	TCONS_l2_00014470	NA	XLOC_l2_007931		0.403551	6.84397	1.14763	0.281663	0.661491	-5.71955
140	89	0	A_23_P120428	NM_014477	27296	TP53TG5	TP53 target 5	-0.403538	6.10794	-1.50415	0.167906	0.574715	-5.29678
264	13	0	A_33_P3881056	AK130638	NA			-0.403295	7.01644	-2.49691	0.0348482	0.364378	-3.85796
229	92	0	A_33_P3538279	AF130079	114224	PRO2852	uncharacterized protein PRO2852	-0.403255	7.34539	-3.67529	0.00540665	0.209546	-2.04276
104	52	0	A_21_P0003895	ENST00000503232	NA	XLOC_003962		0.403064	5.76366	1.13682	0.285918	0.663972	-5.73114
3	159	0	A_23_P113393	NM_017413	8862	APLN	apelin	0.402977	7.14825	2.93198	0.0172879	0.301641	-3.18156
5	145	0	A_21_P0002120	ENST00000458254	NA	XLOC_002402		0.402737	6.23085	2.69432	0.0253289	0.331212	-3.5516
18	116	0	A_23_P70127	NM_017510	54732	TMED9	transmembrane emp24 protein transport domain containing 9	0.402331	12.2124	3.72467	0.00501625	0.203833	-1.96902
235	23	0	A_33_P3389008	NM_014394	27069	GHITM	growth hormone inducible transmembrane protein	-0.402228	6.60438	-1.36341	0.20695	0.609462	-5.47247
320	85	0	A_32_P28223	AF074986	NA			0.402048	8.33264	4.36875	0.00194627	0.147078	-1.03798
223	96	0	A_24_P941912	NM_138287	151636	DTX3L	deltex 3-like (Drosophila)	-0.401998	7.8214	-4.73986	0.00115893	0.122611	-0.530245
268	52	0	A_23_P110184	NM_006745	6307	MSMO1	methylsterol monooxygenase 1	0.401983	8.50168	3.01561	0.0151272	0.290212	-3.05154
214	5	0	A_21_P0001059	ENST00000423842	NA	XLOC_000554		-0.401931	6.17594	-6.33444	0.000155931	0.0471947	1.39817
5	46	0	A_33_P3420941	BC046381	439950	LOC439950	uncharacterized LOC439950	0.401888	6.07858	1.25438	0.242318	0.636463	-5.60095
231	85	0	A_21_P0008653	ENST00000326995	NA	NR2E3	nuclear receptor subfamily 2, group E, member 3	-0.401655	5.76609	-1.29375	0.229003	0.626152	-5.55537
197	113	0	A_21_P0002754	ENST00000461528	NA	XLOC_002715		-0.401508	5.68333	-1.50857	0.166793	0.573025	-5.2911
235	145	0	A_33_P3261438	THC2739142	NA			-0.401443	5.82218	-1.75394	0.114453	0.513727	-4.962
48	93	0	A_23_P36795	NM_005639	6857	SYT1	synaptotagmin I	0.401393	11.5043	3.39777	0.00828577	0.23732	-2.46239
20	70	0	A_23_P259141	NM_030776	81030	ZBP1	Z-DNA binding protein 1	0.401351	6.06727	1.76692	0.112158	0.510773	-4.94393
163	101	0	A_33_P3256655	A_33_P3256655	NA			-0.400924	5.77658	-3.05476	0.0142133	0.286233	-2.99076
201	127	0	A_21_P0014336	XR_109337	NA	LOC100506735	uncharacterized LOC100506735	-0.400883	6.1446	-1.41671	0.191324	0.597043	-5.40717
170	140	0	A_33_P3278033	NM_001004125	286319	TUSC1	tumor suppressor candidate 1	0.400757	12.0258	0.561453	0.58864	0.836253	-6.215
210	120	0	A_23_P47322	NM_017589	54766	BTG4	B-cell translocation gene 4	-0.40073	5.6469	-1.38203	0.201371	0.604453	-5.44984
12	55	0	A_33_P3317336	ENST00000381778	NA			0.400699	5.67842	0.982621	0.352298	0.705357	-5.88734
39	28	0	A_23_P37718	NM_001297	1258	CNGB1	cyclic nucleotide gated channel beta 1	0.400488	7.04062	1.29353	0.229076	0.626152	-5.55563
228	138	0	A_33_P3293346	NM_016121	51133	KCTD3	potassium channel tetramerisation domain containing 3	0.400274	9.35174	2.69398	0.0253428	0.331212	-3.55213
62	14	0	A_21_P0007159	ENST00000452309	NA	XLOC_009464		-0.400099	5.72165	-1.80938	0.104944	0.500484	-4.88436
8	144	0	A_33_P3323607	ENST00000409717	223075	CCDC129	coiled-coil domain containing 129	0.400039	8.25792	3.06284	0.014032	0.284952	-2.97823
308	53	0	A_33_P3344599	ENST00000377153	10277	UBE4B	ubiquitination factor E4B	-0.399913	5.85875	-1.19421	0.263903	0.649899	-5.66872
82	15	0	A_33_P3242214	ENST00000517343	NA			0.399766	5.90416	1.03709	0.327627	0.691167	-5.83416
268	125	0	A_33_P3306659	AB002446	728254	LOC728254	uncharacterized LOC728254	-0.399377	6.45494	-1.43914	0.185061	0.59078	-5.37923
360	105	0	A_33_P3320523	ENST00000398669	NA			-0.399067	5.80539	-1.3455	0.212438	0.613972	-5.49405
77	155	0	A_33_P3265866	A_33_P3265866	NA			0.39897	7.46221	3.70413	0.00517487	0.207125	-1.99966
81	149	0	A_32_P85676	NM_018401	55351	STK32B	serine/threonine kinase 32B	0.398782	5.8782	0.875663	0.404713	0.737975	-5.98502
117	119	0	A_23_P91076	NM_032824	84910	TMEM87B	transmembrane protein 87B	-0.398709	9.511	-2.81655	0.0208032	0.31599	-3.36128
52	140	0	A_23_P333038	NM_025145	80217	WDR96	WD repeat domain 96	-0.39861	6.73902	-6.78533	9.3904e-05	0.0353446	1.87218
96	53	0	A_33_P3522511	AB007954	57235	KIAA0485	uncharacterized LOC57235	-0.398511	6.4439	-7.42586	4.75544e-05	0.0227012	2.49667
122	55	0	A_21_P0010294	THC2726832	NA	XLOC_014105		0.398362	6.51405	1.1456	0.282458	0.661732	-5.72173
173	129	0	A_33_P3394465	NM_006261	5626	PROP1	PROP paired-like homeobox 1	0.398192	6.66017	3.17664	0.0117175	0.270625	-2.80207
190	29	0	A_33_P3311473	NM_020453	57205	ATP10D	ATPase, class V, type 10D	-0.398181	6.30621	-0.907236	0.388691	0.72858	-5.95714
38	160	0	A_23_P105227	NM_001014811	10873	ME3	malic enzyme 3, NADP(+)-dependent, mitochondrial	0.398075	5.83837	1.10915	0.297047	0.672907	-5.76043
362	89	0	A_33_P3241184	A_33_P3241184	NA			-0.398061	7.63669	-1.28061	0.233377	0.629512	-5.57069
163	20	0	A_33_P3422999	A_33_P3422999	NA			-0.398017	6.04338	-1.26506	0.238645	0.633506	-5.58868
103	89	0	A_23_P25121	NM_016594	51303	FKBP11	FK506 binding protein 11, 19 kDa	0.397893	12.4159	8.1303	2.36403e-05	0.0149256	3.12247
87	155	0	A_33_P3420862	NM_001015038	389860	PAGE2B	P antigen family, member 2B	-0.397647	7.8669	-5.70113	0.000331826	0.06803	0.680818
41	51	0	A_21_P0014904	XR_132901	NA	LOC100652738	uncharacterized LOC100652738	0.397409	8.52267	5.70361	0.000330811	0.06803	0.683752
44	78	0	A_23_P117387	NM_054024	117153	MIA2	melanoma inhibitory activity 2	0.397361	6.04077	0.955282	0.365193	0.713467	-5.91317
70	42	0	A_23_P69586	NM_005245	2195	FAT1	FAT tumor suppressor homolog 1 (Drosophila)	-0.39735	11.1744	-7.09229	6.73952e-05	0.0295317	2.17837
284	23	0	A_23_P1102	NM_001100	58	ACTA1	actin, alpha 1, skeletal muscle	-0.397316	7.83754	-2.82959	0.020372	0.313835	-3.34098
229	85	0	A_23_P123308	NM_031271	56154	TEX15	testis expressed 15	-0.39694	7.34236	-2.11111	0.0649637	0.436743	-4.44557
16	6	0	A_23_P404045	NM_005957	4524	MTHFR	methylenetetrahydrofolate reductase (NAD(P)H)	0.396811	6.77553	1.329	0.217605	0.61839	-5.51377
179	18	0	A_24_P235338	NM_007332	8989	TRPA1	transient receptor potential cation channel, subfamily A, member 1	-0.396731	5.64741	-1.39929	0.196315	0.60115	-5.42868
353	6	0	A_33_P3331882	NM_001098482	23373	CRTC1	CREB regulated transcription coactivator 1	0.396729	10.5145	5.93931	0.000248262	0.0589633	0.957882
87	63	0	A_23_P30603	NM_003649	8528	DDO	D-aspartate oxidase	0.39663	5.96457	0.855367	0.415256	0.744756	-6.0025
132	29	0	A_33_P3508541	BC040189	400622	LOC400622	uncharacterized LOC400622	0.396334	5.77135	1.20287	0.260702	0.648217	-5.65911
119	37	0	A_33_P3222203	NM_148962	165140	OXER1	oxoeicosanoid (OXE) receptor 1	0.39633	6.5295	1.53283	0.160796	0.567121	-5.25975
153	96	0	A_23_P321913	NM_022047	50619	DEF6	differentially expressed in FDCP 6 homolog (mouse)	-0.39614	7.01167	-2.24607	0.0522776	0.410406	-4.24247
111	84	0	A_21_P0010360	ENST00000450216	NA	XLOC_014243		0.39604	5.87528	1.13877	0.28515	0.663459	-5.72906
313	157	0	A_33_P3232038	NM_001204513	100533952	RBAK-LOC389458	RBAK-LOC389458 readthrough	0.395937	11.5628	2.10256	0.0658606	0.438103	-4.45831
11	86	0	A_33_P3408683	A_33_P3408683	NA			0.395734	5.78891	1.00874	0.340296	0.698421	-5.86211
7	142	0	A_23_P158297	NM_197975	10917	BTNL3	butyrophilin-like 3	0.395681	5.98919	1.59771	0.145692	0.551659	-5.17454
174	75	0	A_23_P13929	NM_031474	83714	NRIP2	nuclear receptor interacting protein 2	0.395444	6.82592	1.35974	0.208065	0.610177	-5.47691
145	31	0	A_21_P0010200	ENST00000427911	NA	XLOC_014056		-0.395396	6.43925	-1.43063	0.187414	0.592505	-5.38985
154	42	0	A_23_P11408	NM_001002758	442862	PRY2	PTPN13-like, Y-linked 2	-0.395357	5.81205	-1.8052	0.105634	0.501414	-4.89025
167	126	0	A_33_P3290914	NM_006306	8243	SMC1A	structural maintenance of chromosomes 1A	0.395311	10.807	3.15751	0.012077	0.274276	-2.83163
14	77	0	A_23_P250413	NM_022141	64098	PARVG	parvin, gamma	0.395267	6.05449	0.966413	0.359901	0.709519	-5.90272
263	30	0	A_23_P387000	NM_173683	286046	XKR6	XK, Kell blood group complex subunit-related family, member 6	-0.395134	8.31675	-5.1705	0.00065118	0.094642	0.0309189
331	37	0	A_33_P3321369	XR_109231	145757	LOC145757	uncharacterized LOC145757	0.394992	9.70031	4.05673	0.0030565	0.174072	-1.48153
278	115	0	A_33_P3240518	NM_001127230	54998	AURKAIP1	aurora kinase A interacting protein 1	0.394761	14.7155	1.3453	0.2125	0.613986	-5.49429
208	121	0	A_33_P3498613	A_33_P3498613	NA			-0.394401	6.49269	-1.70157	0.124165	0.526187	-5.03433
125	118	0	A_33_P3224249	NM_172239	254958	REXO1L1	REX1, RNA exonuclease 1 homolog (S. cerevisiae)-like 1	0.394347	6.09568	1.56317	0.153566	0.559384	-5.22013
96	125	0	A_21_P0011492	TCONS_l2_00010367	NA	XLOC_l2_005602		0.394332	7.06361	3.28344	0.00990528	0.255577	-2.63752
188	116	0	A_33_P3332287	XR_109820	554045	DUX4L9	double homeobox 4 like 9	0.39406	5.77048	1.92169	0.0879005	0.475518	-4.72397
93	19	0	A_21_P0004900	TCONS_00011863	NA	XLOC_005355		0.393979	5.62313	1.33191	0.216688	0.617574	-5.51031
168	128	0	A_33_P3741835	AK127166	645078	ZCCHC23	zinc finger, CCHC domain containing 23	-0.393961	5.75631	-4.47722	0.00166915	0.140048	-0.8873
268	117	0	A_33_P3258452	NM_020375	57103	C12orf5	chromosome 12 open reading frame 5	-0.393665	8.65694	-2.81491	0.0208581	0.316384	-3.36383
9	45	0	A_33_P3326898	XR_133519	100132249	LOC100132249	uncharacterized LOC100132249	0.393233	7.46821	1.57046	0.151873	0.556983	-5.21056
136	39	0	A_23_P84910	NM_003446	7712	ZNF157	zinc finger protein 157	0.393053	9.57092	3.99337	0.00335557	0.178774	-1.57337
100	134	0	A_23_P108734	NM_018436	55821	ALLC	allantoicase	-0.392848	7.61469	-7.21349	5.92928e-05	0.0267807	2.29573
351	55	0	A_19_P00322599	NM_001145206	NA	KIAA1671		0.392828	8.7564	4.58585	0.00143361	0.130889	-0.73827
272	100	0	A_21_P0004621	AK055570	NA	XLOC_005938		0.39276	7.47469	1.44936	0.182265	0.58788	-5.36641
159	52	0	A_21_P0005225	ENST00000415356	NA	XLOC_006049		0.392484	5.78283	1.4326	0.186867	0.592231	-5.3874
223	99	0	A_33_P3289745	XR_111182	399900	LOC399900	uncharacterized LOC399900	0.392451	6.89712	4.46749	0.00169218	0.140616	-0.900739
265	130	0	A_33_P3391339	ENST00000383040	NA			0.392422	10.8061	6.09005	0.000207413	0.0556084	1.12866
376	13	0	A_33_P3408054	NR_003132	391634	HSP90AB2P	heat shock protein 90kDa alpha (cytosolic), class B member 2, pseudogene	0.392344	14.656	2.2544	0.0515801	0.409765	-4.22984
355	3	0	A_23_P110184	NM_006745	6307	MSMO1	methylsterol monooxygenase 1	0.392283	8.3122	2.85086	0.0196878	0.309628	-3.30785
270	38	0	A_21_P0011544	THC2699069	NA	XLOC_l2_005793		-0.392234	6.61339	-1.0991	0.301174	0.675419	-5.77094
19	71	0	A_21_P0004771	ENST00000430728	NA	XLOC_005809		0.392216	7.19612	0.889777	0.397494	0.734112	-5.97265
89	135	0	A_21_P0004910	TCONS_00011890	NA	XLOC_005389		0.392182	5.93498	0.829881	0.428763	0.752771	-6.02397
218	24	0	A_21_P0011584	AK125757	NA	XLOC_l2_006036		-0.39207	5.57972	-1.75374	0.114489	0.513727	-4.96229
224	52	0	A_23_P110184	NM_006745	6307	MSMO1	methylsterol monooxygenase 1	0.392009	8.71881	3.341	0.00905216	0.244911	-2.5492
105	132	0	A_21_P0005614	NR_027321	NA	LOC157381	uncharacterized LOC157381	0.391992	6.02379	1.11098	0.296303	0.672283	-5.75852
13	44	0	A_33_P3278826	ENST00000360087	4058	LTK	leukocyte receptor tyrosine kinase	0.391802	9.01977	4.35881	0.00197403	0.147829	-1.05188
139	99	0	A_23_P412321	NM_000579	1234	CCR5	chemokine (C-C motif) receptor 5	0.391546	7.51086	1.74632	0.115821	0.515241	-4.97259
229	150	0	A_23_P151294	NM_000619	3458	IFNG	interferon, gamma	-0.391475	5.602	-1.28594	0.231595	0.628224	-5.56449
5	43	0	A_21_P0005755	TCONS_00014838	NA	XLOC_006905		0.391346	6.00301	1.30823	0.224263	0.623073	-5.53838
66	67	0	A_21_P0013119	TCONS_l2_00025055	NA	XLOC_l2_013233		0.39126	6.12927	1.39288	0.198178	0.602287	-5.43655
105	131	0	A_21_P0000591	NR_033309	NA	SNORA70F	small nucleolar RNA, H/ACA box 70F (retrotransposed)	0.391138	9.20413	4.44179	0.00175468	0.14075	-0.936301
151	141	0	A_23_P17673	NM_013369	29947	DNMT3L	DNA (cytosine-5-)-methyltransferase 3-like	-0.390918	5.6782	-1.83431	0.100912	0.494872	-4.8491
67	85	0	A_33_P3393582	AK124193	23582	CCNDBP1	cyclin D-type binding-protein 1	0.390911	7.44561	7.04036	7.12318e-05	0.0303081	2.12749
118	126	0	A_24_P917819	NR_026916	149992	ANKRD30BP2	ankyrin repeat domain 30B pseudogene 2	-0.390725	5.77024	-1.94601	0.0845719	0.469649	-4.68874
40	62	0	A_23_P24275	NR_027709	55853	IDI2-AS1	IDI2 antisense RNA 1 (non-protein coding)	-0.3907	6.98608	-6.43465	0.000139015	0.0448707	1.50609
324	95	0	A_21_P0013872	ENST00000444691	NA	XLOC_l2_015828		-0.390643	5.91517	-1.14048	0.284474	0.662849	-5.72723
84	125	0	A_33_P3374299	NM_173561	222643	UNC5CL	unc-5 homolog C (C. elegans)-like	0.390295	5.8089	0.967169	0.359544	0.709259	-5.90201
37	2	0	A_23_P360268	NR_026935	158696	LOC158696	uncharacterized LOC158696	0.390244	6.07692	1.42063	0.190216	0.595506	-5.4023
334	44	0	A_23_P28707	NM_007346	11054	OGFR	opioid growth factor receptor	0.39013	15.3221	3.21678	0.010999	0.265189	-2.74013
95	30	0	A_23_P151895	NM_003613	8483	CILP	cartilage intermediate layer protein, nucleotide pyrophosphohydrolase	0.390124	7.22892	1.11203	0.295872	0.67185	-5.75741
8	88	0	A_23_P98898	NM_001798	1017	CDK2	cyclin-dependent kinase 2	0.390078	9.50051	1.93905	0.0855113	0.470816	-4.69883
120	50	0	A_24_P175187	NM_017654	54809	SAMD9	sterile alpha motif domain containing 9	-0.390023	6.60951	-2.57289	0.0308182	0.352712	-3.7403
202	36	0	A_21_P0009384	TCONS_00025886	NA	XLOC_012161		-0.389752	5.63733	-2.53349	0.0328458	0.357898	-3.80136
253	131	0	A_21_P0006092	ENST00000443716	NA	XLOC_007781		-0.389623	5.70882	-1.29533	0.22848	0.625907	-5.55352
164	121	0	A_23_P122508	NM_080870	135656	DPCR1	diffuse panbronchiolitis critical region 1	-0.389621	5.63091	-5.2526	0.000585172	0.0916254	0.134459
320	95	0	A_24_P409250	ENST00000534745	NA			-0.389587	6.06072	-1.17327	0.27177	0.655474	-5.69175
145	24	0	A_19_P00319422	NM_001145206	NA	KIAA1671		0.389378	8.89917	4.72091	0.00118943	0.122889	-0.555623
12	117	0	A_33_P3418952	NM_001146257	158866	ZDHHC15	zinc finger, DHHC-type containing 15	0.388893	6.81147	0.845451	0.420476	0.747856	-6.01092
249	119	0	A_33_P3335042	NM_016142	51144	HSD17B12	hydroxysteroid (17-beta) dehydrogenase 12	0.388809	10.7935	2.85393	0.0195912	0.309479	-3.30307
94	77	0	A_21_P0014854	XR_132737	NA	LOC100652889	uncharacterized LOC100652889	0.388702	6.17027	2.20925	0.0554756	0.416592	-4.2982
222	68	0	A_21_P0011512	ENST00000445035	NA	XLOC_l2_005667		-0.388649	5.51957	-1.24552	0.245402	0.638208	-5.61107
149	35	0	A_23_P422240	NM_144639	131669	UROC1	urocanase domain containing 1	-0.388645	5.74533	-1.63239	0.138154	0.54388	-5.12822
224	158	0	A_21_P0001764	ENST00000451123	NA	LOC100130097	kinesin-like protein family member 6-like	-0.388451	5.75757	-1.76598	0.112323	0.510947	-4.94524
356	52	0	A_21_P0010059	TCONS_00028444	NA	XLOC_013803		0.388447	7.7011	2.3593	0.0435383	0.388551	-4.06982
311	3	0	A_21_P0001130	ENST00000440897	NA	XLOC_000829		-0.38818	5.61068	-1.70551	0.123409	0.525338	-5.02893
65	55	0	A_21_P0000285	NR_002744	NA	SNORD49A	small nucleolar RNA, C/D box 49A	0.388177	8.7718	4.97559	0.0008425	0.107636	-0.219299
11	152	0	A_21_P0003851	ENST00000503950	NA	XLOC_003680		0.388114	6.0576	1.31835	0.220999	0.619919	-5.52642
244	16	0	A_33_P3237590	AK123396	728178	LOC728178	uncharacterized LOC728178	0.388089	7.04544	4.67484	0.00126728	0.124793	-0.617598
36	12	0	A_23_P250629	NM_004159	5696	PSMB8	proteasome (prosome, macropain) subunit, beta type, 8 (large multifunctional peptidase 7)	0.388068	8.85115	1.78859	0.10842	0.505206	-4.91361
139	155	0	A_33_P3748410	ENST00000439598	NA			-0.387914	6.046	-2.75895	0.0228232	0.324616	-3.45099
325	137	0	A_33_P3313596	NM_033487	984	CDK11B	cyclin-dependent kinase 11B	0.387882	11.705	2.46817	0.0365069	0.369837	-3.90235
83	4	0	A_21_P0003973	ENST00000505844	NA	XLOC_004308		0.387515	6.24252	3.06867	0.0139028	0.284014	-2.9692
235	90	0	A_33_P3240632	NM_001136271	137814	NKX2-6	NK2 homeobox 6	-0.387373	5.64821	-1.49083	0.171302	0.577281	-5.31385
157	38	0	A_23_P387537	NM_024082	79057	PRRG3	proline rich Gla (G-carboxyglutamic acid) 3 (transmembrane)	-0.387258	5.95475	-1.56552	0.153018	0.558822	-5.21705
43	160	0	A_33_P3389168	ENST00000370393	4534	MTM1	myotubularin 1	0.38719	5.75859	1.05398	0.320249	0.687433	-5.81722
148	50	0	A_21_P0009134	TCONS_00025055	NA	XLOC_012009		-0.387146	6.20956	-1.35953	0.208128	0.610209	-5.47716
235	52	0	A_23_P28772	NM_001048226	55861	DBNDD2	dysbindin (dystrobrevin binding protein 1) domain containing 2	-0.387062	11.9014	-9.23702	8.64025e-06	0.00694312	3.99129
104	85	0	A_21_P0000041	NM_001164390	NA	RAPGEF6	Rap guanine nucleotide exchange factor (GEF) 6	0.386933	5.78443	0.896963	0.393854	0.731598	-5.9663
109	102	0	A_33_P3326210	NM_001017420	157570	ESCO2	establishment of cohesion 1 homolog 2 (S. cerevisiae)	0.386822	9.88878	4.19858	0.00248514	0.161774	-1.27805
130	105	0	A_33_P3379341	NM_001144931	391322	LOC391322	D-dopachrome tautomerase-like	0.386803	7.26204	6.7245	0.000100412	0.037081	1.80994
169	73	0	A_23_P162547	NM_000432	4633	MYL2	myosin, light chain 2, regulatory, cardiac, slow	-0.386796	5.74673	-2.81467	0.0208662	0.316426	-3.36421
9	145	0	A_33_P3317453	THC2636181	NA			0.386373	6.01112	0.960336	0.362783	0.711697	-5.90844
306	103	0	A_33_P3312187	A_33_P3312187	NA			-0.386351	6.76058	-8.65739	1.4448e-05	0.0104733	3.55261
159	112	0	A_23_P101131	NM_002091	2922	GRP	gastrin-releasing peptide	0.386277	6.22103	1.307	0.224662	0.623446	-5.53983
22	65	0	A_23_P108734	NM_018436	55821	ALLC	allantoicase	-0.386196	7.73554	-5.98634	0.000234647	0.0575542	1.01154
144	50	0	A_33_P3236327	AK128005	100129869	LOC100129869	uncharacterized LOC100129869	-0.385841	5.71374	-2.4784	0.0359079	0.367959	-3.88656
361	119	0	A_24_P298174	NM_006807	10951	CBX1	chromobox homolog 1	0.385812	13.7183	3.08526	0.0135413	0.283258	-2.94348
147	121	0	A_23_P111240	NM_014721	9749	PHACTR2	phosphatase and actin regulator 2	-0.385674	8.40492	-3.98953	0.00337466	0.179159	-1.57895
286	160	0	A_23_P144348	NM_004787	9353	SLIT2	slit homolog 2 (Drosophila)	-0.385499	8.8809	-6.44677	0.000137109	0.0447257	1.51904
83	16	0	A_33_P3281641	NM_001005470	119765	OR4B1	olfactory receptor, family 4, subfamily B, member 1	0.385405	5.89575	0.748602	0.473825	0.776272	-6.0887
16	118	0	A_21_P0004417	ENST00000505694	NA	XLOC_004907		0.38519	6.19059	0.968235	0.359041	0.709073	-5.90101
236	134	0	A_33_P3227457	ENST00000396039	84612	PARD6B	par-6 partitioning defective 6 homolog beta (C. elegans)	-0.385189	6.23928	-1.44587	0.183216	0.588861	-5.3708
188	41	0	A_21_P0013323	TCONS_l2_00026655	NA	XLOC_l2_013873		-0.385139	7.55405	-2.72291	0.0241879	0.328144	-3.50712
16	135	0	A_23_P144959	NM_004385	1462	VCAN	versican	-0.385133	11.8053	-9.24207	8.60265e-06	0.00694312	3.99496
289	155	0	A_21_P0006587	ENST00000432272	NA	XLOC_008272		-0.385058	6.22576	-1.23906	0.247669	0.639391	-5.61842
121	13	0	A_33_P3246593	NM_001010906	389643	C8orf80	chromosome 8 open reading frame 80	0.384904	5.88408	1.27864	0.234039	0.629922	-5.57298
150	67	0	A_33_P3286002	AK125618	79001	VKORC1	vitamin K epoxide reductase complex, subunit 1	0.384544	9.21733	4.33175	0.00205176	0.149251	-1.08979
44	14	0	A_32_P3955	NM_001100159	136288	C7orf57	chromosome 7 open reading frame 57	0.384496	5.81612	0.788642	0.451251	0.765049	-6.05753
32	142	0	A_23_P108734	NM_018436	55821	ALLC	allantoicase	-0.384449	7.58078	-4.82497	0.00103193	0.116865	-0.416928
272	118	0	A_21_P0009734	BC063630	NA	XLOC_013194		-0.384227	6.28705	-1.33354	0.216175	0.617101	-5.50837
44	26	0	A_21_P0003437	ENST00000503637	NA	XLOC_003825		0.383985	5.80455	1.12847	0.289244	0.666981	-5.74004
80	66	0	A_21_P0011321	TCONS_l2_00008611	NA	XLOC_l2_004640		-0.383964	6.23062	-7.30873	5.36758e-05	0.0248164	2.38657
253	22	0	A_33_P3363732	NM_021247	58531	PRM3	protamine 3	-0.383804	5.49018	-1.73963	0.117035	0.51733	-4.98187
253	20	0	A_21_P0008096	THC2672764	NA	XLOC_010456		-0.383749	5.49486	-3.46439	0.00747227	0.230745	-2.3609
135	41	0	A_21_P0007917	AK123584	NA	XLOC_010706		-0.383699	5.99013	-1.35093	0.210762	0.612809	-5.48753
29	53	0	A_23_P111240	NM_014721	9749	PHACTR2	phosphatase and actin regulator 2	-0.383594	8.27096	-4.12775	0.00275468	0.168319	-1.37928
110	40	0	A_23_P107102	NM_032559	84643	KIF2B	kinesin family member 2B	0.383536	5.81066	1.31048	0.223532	0.622545	-5.53572
143	14	0	A_21_P0013056	THC2730466	NA	XLOC_l2_012847		0.383351	6.33183	1.73492	0.117897	0.518109	-4.98839
241	164	0	A_23_P110184	NM_006745	6307	MSMO1	methylsterol monooxygenase 1	0.383321	8.33637	3.51308	0.00693104	0.226267	-2.28702
42	108	0	A_21_P0003185	TCONS_00006684	NA	XLOC_003286		0.38331	5.78249	0.984634	0.351361	0.704528	-5.88541
163	157	0	A_33_P3380883	NR_027302	7507	XPA	xeroderma pigmentosum, complementation group A	-0.382933	7.40421	-5.58292	0.000384304	0.0732636	0.539967
8	43	0	A_21_P0000711	NR_037969	NA	LOC100506462	uncharacterized LOC100506462	0.382854	7.95942	1.00547	0.341785	0.699692	-5.86531
49	45	0	A_21_P0013042	TCONS_l2_00024457	NA	XLOC_l2_012748		0.382601	6.63503	1.05529	0.319682	0.687111	-5.8159
136	38	0	A_23_P426944	NM_006194	5083	PAX9	paired box 9	0.382445	6.58074	0.958731	0.363547	0.712106	-5.90994
214	150	0	A_21_P0001179	ENST00000419578	NA	XLOC_001030		-0.382426	5.78175	-1.53162	0.16109	0.567477	-5.26131
298	134	0	A_23_P65262	NM_033111	10443	N4BP2L2	NEDD4 binding protein 2-like 2	-0.382371	8.60183	-4.87036	0.000970416	0.115167	-0.356982
218	93	0	A_32_P213091	NM_001145205	729993	SHISA9	shisa homolog 9 (Xenopus laevis)	-0.382204	5.59153	-1.41121	0.192888	0.598022	-5.41398
159	125	0	A_21_P0002556	ENST00000457178	NA	XLOC_002542		-0.382093	5.60088	-2.68943	0.0255296	0.331864	-3.55921
298	65	0	A_24_P378019	NM_004031	3665	IRF7	interferon regulatory factor 7	-0.381959	13.8293	-6.58471	0.000117322	0.0412501	1.66491
133	84	0	A_33_P3249736	ENST00000429274	NA			0.381878	5.7941	1.08002	0.309128	0.680236	-5.79069
159	74	0	A_21_P0014350	XR_109394	NA	LOC100506295	uncharacterized LOC100506295	0.381524	11.2756	2.77368	0.0222884	0.32268	-3.42806
137	96	0	A_33_P3305763	BC069683	NA			-0.381501	6.3237	-3.73877	0.00491035	0.203329	-1.94803
238	28	0	A_24_P16124	NR_001590	340198	IFITM4P	interferon induced transmembrane protein 4 pseudogene	-0.381296	9.88771	-2.9316	0.0172986	0.301641	-3.18216
52	61	0	A_32_P185637	NM_020882	57642	COL20A1	collagen, type XX, alpha 1	-0.381248	6.69274	-7.08317	6.80517e-05	0.0295984	2.16947
94	139	0	A_21_P0004935	TCONS_00011944	NA	XLOC_005453		0.381242	5.8067	1.9443	0.0848018	0.469709	-4.69122
177	47	0	A_33_P3326568	ENST00000467497	169792	GLIS3	GLIS family zinc finger 3	0.381192	5.8749	1.97849	0.0803134	0.462172	-4.64144
15	71	0	A_21_P0010502	NR_003716	NA	HOTAIR	HOX transcript antisense RNA (non-protein coding)	0.381115	7.529	1.17635	0.2706	0.654561	-5.68838
142	121	0	A_23_P153372	NM_032855	84941	HSH2D	hematopoietic SH2 domain containing	0.381112	5.97934	1.05117	0.321467	0.68798	-5.82005
164	65	0	A_23_P1904	NM_000139	2206	MS4A2	membrane-spanning 4-domains, subfamily A, member 2 (Fc fragment of IgE, high affinity I, receptor for; beta polypeptide)	-0.381003	5.70701	-1.65878	0.132656	0.537378	-5.09263
341	68	0	A_23_P28969	NM_176812	128866	CHMP4B	charged multivesicular body protein 4B	0.380931	11.2128	2.07067	0.0693159	0.444124	-4.50572
324	74	0	A_33_P3687389	CA309819	53393	C17orf13	chromosome 17 open reading frame 13	-0.380886	5.89497	-1.14845	0.281343	0.661491	-5.71867
325	113	0	A_23_P32861	NM_015938	51068	NMD3	NMD3 homolog (S. cerevisiae)	-0.380859	9.52722	-5.88503	0.000265056	0.0603228	0.895527
80	14	0	A_21_P0001144	ENST00000458146	NA	XLOC_000882		0.380803	5.92581	0.98062	0.35323	0.706015	-5.88925
331	81	0	A_21_P0013779	ENST00000455331	NA	XLOC_l2_015578		0.380774	6.65339	3.86329	0.00407155	0.192906	-1.76369
294	132	0	A_24_P177948	NM_173812	283417	DPY19L2	dpy-19-like 2 (C. elegans)	-0.380753	6.0456	-1.88546	0.0930903	0.484173	-4.77614
228	102	0	A_19_P00320614	NR_033852	NA	LOC283177	uncharacterized LOC283177	-0.380455	6.77699	-1.56458	0.153238	0.559036	-5.21829
288	160	0	A_33_P3247639	ENST00000425181	NA			-0.380413	5.60305	-1.73346	0.118165	0.518185	-4.99041
268	95	0	A_19_P00319682	NM_001137550	NA	LRRFIP1		0.380379	9.38919	4.37108	0.00193982	0.146779	-1.03472
22	87	0	A_23_P108734	NM_018436	55821	ALLC	allantoicase	-0.380348	7.69808	-7.65517	3.76733e-05	0.0192882	2.70709
50	4	0	A_33_P3260974	DA734158	NA			0.380179	7.53928	2.42102	0.0394017	0.376922	-3.97504
25	147	0	A_23_P69497	NM_003278	7123	CLEC3B	C-type lectin domain family 3, member B	-0.380172	8.80453	-5.56118	0.000394904	0.0739808	0.51382
328	146	0	A_21_P0006504	THC2642571	NA	XLOC_008005		-0.380069	6.15461	-7.27038	5.58639e-05	0.0256262	2.35014
223	82	0	A_24_P84396	NM_018689	57214	KIAA1199	KIAA1199	-0.379815	5.70308	-1.38821	0.199548	0.603099	-5.44228
7	124	0	A_23_P118894	NM_024320	79170	PRR15L	proline rich 15-like	0.379403	5.99865	1.4876	0.172136	0.577996	-5.31798
363	75	0	A_23_P110184	NM_006745	6307	MSMO1	methylsterol monooxygenase 1	0.379402	8.49981	3.51101	0.00695319	0.226314	-2.29015
45	52	0	A_33_P3601202	NR_036676	3453	IFNA22P	interferon, alpha 22, pseudogene	-0.379278	7.24615	-3.49406	0.00713737	0.228384	-2.31585
25	114	0	A_23_P102172	NM_173077	130749	CPO	carboxypeptidase O	-0.379121	6.01435	-5.47825	0.000438355	0.0772939	0.413385
233	101	0	A_23_P50928	NM_182528	165257	C1QL2	complement component 1, q subcomponent-like 2	-0.379118	5.80569	-1.08567	0.306756	0.67882	-5.78487
283	145	0	A_23_P117515	NM_002892	5926	ARID4A	AT rich interactive domain 4A (RBP1-like)	-0.379094	7.85612	-5.9367	0.00024904	0.0589633	0.954903
265	127	0	A_33_P3806524	BC040718	9229	DLGAP1	discs, large (Drosophila) homolog-associated protein 1	-0.378893	5.59519	-1.86686	0.0958659	0.488293	-4.80276
177	70	0	A_33_P3287399	NR_024457	100190940	LOC100190940	uncharacterized LOC100190940	-0.378675	5.70924	-1.32672	0.218329	0.618982	-5.51649
72	85	0	A_21_P0010870	NM_001169106	NA	FAM21C	family with sequence similarity 21, member C	0.378604	8.63005	3.72149	0.00504045	0.204001	-1.97376
10	151	0	A_21_P0007546	ENST00000551021	NA	XLOC_009723		0.37846	7.01616	2.00165	0.0774021	0.457668	-4.60753
323	96	0	A_33_P3272070	NM_001005270	283093	OR4C12	olfactory receptor, family 4, subfamily C, member 12	-0.378358	5.73256	-1.142	0.283874	0.662424	-5.7256
379	107	0	A_23_P108734	NM_018436	55821	ALLC	allantoicase	-0.37831	7.73754	-5.01053	0.000804166	0.104617	-0.173995
218	68	0	A_24_P827	NM_003599	8464	SUPT3H	suppressor of Ty 3 homolog (S. cerevisiae)	-0.378233	7.20915	-1.4293	0.187784	0.592885	-5.39151
250	45	0	A_32_P154342	NM_180991	353189	SLCO4C1	solute carrier organic anion transporter family, member 4C1	-0.378202	6.93304	-1.89469	0.0917414	0.481551	-4.76288
380	151	0	A_23_P110606	NM_014757	9794	MAML1	mastermind-like 1 (Drosophila)	-0.378176	9.24599	-5.10836	0.000706499	0.0989306	-0.0481819
236	145	0	A_21_P0002531	TCONS_00004544	NA	XLOC_002452		-0.378148	5.73696	-1.6029	0.144542	0.550332	-5.16765
259	11	0	A_23_P69383	NM_031458	83666	PARP9	poly (ADP-ribose) polymerase family, member 9	-0.378131	8.58048	-4.20763	0.00245279	0.160737	-1.26517
288	9	0	A_21_P0013661	TCONS_l2_00029383	NA	XLOC_l2_015221		-0.378041	5.65982	-1.62982	0.138699	0.544666	-5.13167
184	61	0	A_23_P101521	NM_152358	126123	IZUMO2	IZUMO family member 2	-0.378039	5.83953	-1.23699	0.2484	0.639918	-5.62077
195	150	0	A_24_P46130	NM_001099	55	ACPP	acid phosphatase, prostate	-0.378001	6.4556	-2.25218	0.0517647	0.409931	-4.2332
380	19	0	A_23_P11859	NM_016371	51478	HSD17B7	hydroxysteroid (17-beta) dehydrogenase 7	0.377949	9.94148	3.57221	0.00632862	0.221032	-2.19763
167	2	0	A_33_P3219745	ENST00000368681	3608	ILF2	interleukin enhancer binding factor 2, 45kDa	0.377848	6.39085	7.04049	7.12223e-05	0.0303081	2.12761
320	132	0	A_33_P3647427	X52357	7577	ZNF29P	zinc finger protein 29, pseudogene	0.37783	8.15935	1.89339	0.0919294	0.481846	-4.76474
232	19	0	A_21_P0001015	ENST00000422157	NA	XLOC_000388		-0.377776	6.46752	-6.04095	0.000219851	0.0571193	1.07342
155	96	0	A_24_P263310	NM_182562	283777	FAM169B	family with sequence similarity 169, member B	-0.37772	5.69236	-2.4705	0.0363697	0.369617	-3.89876
334	123	0	A_23_P332908	NM_144982	196441	ZFC3H1	zinc finger, C3H1-type containing	0.377448	10.3157	3.00622	0.0153552	0.292032	-3.06613
306	2	0	A_33_P3325439	NM_001001992	10600	USP16	ubiquitin specific peptidase 16	0.377342	11.2754	2.98113	0.0159823	0.295185	-3.10513
314	137	0	A_24_P317708	NM_138969	195814	SDR16C5	short chain dehydrogenase/reductase family 16C, member 5	-0.377333	5.76701	-1.27192	0.236309	0.631588	-5.58076
224	127	0	A_23_P123704	NR_024032	58483	LINC00474	long intergenic non-protein coding RNA 474	-0.37717	5.54675	-1.43599	0.185929	0.59187	-5.38317
186	123	0	A_33_P3379106	NR_027755	283867	LOC283867	uncharacterized LOC283867	-0.377069	5.60829	-1.4427	0.184081	0.590025	-5.37476
73	57	0	A_33_P3344482	NM_001135000	10979	FERMT2	fermitin family member 2	-0.377022	10.2086	-4.02334	0.0032104	0.176338	-1.52986
118	87	0	A_33_P3374982	A_33_P3374982	NA			-0.376965	5.71256	-1.6686	0.130663	0.534543	-5.07932
76	140	0	A_33_P3350268	THC2774746	NA			0.376934	6.02424	0.91914	0.38277	0.72491	-5.94642
162	84	0	A_33_P3412493	ENST00000506319	339855	KY	kyphoscoliosis peptidase	-0.376926	5.90787	-1.36489	0.206502	0.609241	-5.47068
15	68	0	A_23_P383258	NM_004293	9615	GDA	guanine deaminase	0.376857	5.7418	1.00899	0.340184	0.698371	-5.86188
223	162	0	A_33_P3287068	BC027486	728437	LOC728437	hCG2020170	-0.37657	6.25381	-6.45262	0.0001362	0.0446775	1.52527
44	39	0	A_33_P3399064	NR_003285	100008587	RN5-8S1	RNA, 5.8S ribosomal 1	0.376494	10.199	2.82986	0.0203632	0.313835	-3.34056
144	54	0	A_21_P0002230	TCONS_00002913	NA	XLOC_001504		0.376458	5.86569	0.984124	0.351598	0.704589	-5.8859
69	114	0	A_33_P3348887	NM_006195	5090	PBX3	pre-B-cell leukemia homeobox 3	0.376443	12.085	3.20063	0.0112824	0.267516	-2.76504
21	162	0	A_21_P0012550	ENST00000463633	NA	PLSCR2	phospholipid scramblase 2	0.37615	5.81283	0.932593	0.376157	0.720496	-5.93416
338	101	0	A_23_P161998	NM_000613	3263	HPX	hemopexin	-0.376005	6.97585	-8.06991	2.50526e-05	0.0155709	3.07117
313	123	0	A_23_P113111	NM_000044	367	AR	androgen receptor	-0.376004	5.69221	-1.25219	0.243076	0.637003	-5.60345
263	122	0	A_23_P113701	NM_002607	5154	PDGFA	platelet-derived growth factor alpha polypeptide	-0.375764	6.27651	-2.68295	0.025798	0.332536	-3.5693
251	130	0	A_21_P0012629	TCONS_l2_00020853	NA	XLOC_l2_010919		-0.375715	5.65646	-1.68139	0.128105	0.531626	-5.06191
334	151	0	A_23_P89431	NM_002982	6347	CCL2	chemokine (C-C motif) ligand 2	-0.375653	9.63617	-3.77787	0.00462879	0.19969	-1.88992
16	161	0	A_21_P0008124	BX117935	NA	XLOC_010506		0.375531	5.8761	1.56914	0.152178	0.557489	-5.21229
173	112	0	A_21_P0001999	ENST00000458264	NA	XLOC_001958		-0.375404	5.95812	-2.05584	0.0709812	0.445717	-4.52769
324	138	0	A_33_P3401902	NM_001012421	441430	ANKRD20A2	ankyrin repeat domain 20 family, member A2	0.375256	8.31487	1.12125	0.29214	0.669249	-5.74769
240	101	0	A_21_P0004470	TCONS_00010556	NA	XLOC_005083		-0.375223	7.82799	-9.64634	6.10616e-06	0.00535128	4.28104
17	159	0	A_23_P117095	NM_020638	8074	FGF23	fibroblast growth factor 23	0.375064	5.83216	1.31751	0.221265	0.620177	-5.52741
104	158	0	A_21_P0005127	TCONS_00012566	NA	XLOC_005419		0.374898	6.02754	1.94765	0.084351	0.469597	-4.68635
1	83	0	A_23_P63896	NM_000043	355	FAS	Fas (TNF receptor superfamily, member 6)	-0.374814	8.11097	-6.43423	0.000139082	0.0448707	1.50563
11	161	0	A_21_P0012257	BX089987	NA	XLOC_l2_009320		0.374521	5.82481	1.27026	0.236871	0.632083	-5.58268
200	128	0	A_21_P0010931	ENST00000454424	NA	XLOC_l2_001816		-0.374508	5.76749	-1.26188	0.239734	0.634532	-5.59234
206	86	0	A_23_P77103	NM_003104	6652	SORD	sorbitol dehydrogenase	0.374501	12.6328	4.48882	0.00164212	0.139542	-0.871297
287	146	0	A_24_P61864	NM_020198	57003	CCDC47	coiled-coil domain containing 47	0.374159	11.4776	2.82255	0.0206037	0.315029	-3.35194
218	147	0	A_21_P0013744	ENST00000419853	NA	XLOC_l2_015373		-0.374063	5.52983	-2.6656	0.0265308	0.335411	-3.59629
353	70	0	A_21_P0008997	TCONS_00024512	NA	XLOC_011828		-0.374022	6.50774	-0.963844	0.361117	0.71056	-5.90514
12	86	0	A_21_P0000434	NR_003234	NA	SNORD113-6	small nucleolar RNA, C/D box 113-6	0.374016	5.85994	1.08336	0.307723	0.679375	-5.78725
60	79	0	A_23_P64808	NM_017410	3229	HOXC13	homeobox C13	-0.37401	6.54004	-5.50117	0.000425851	0.0757719	0.441247
318	71	0	A_24_P323941	NM_001012971	200232	C20orf106	chromosome 20 open reading frame 106	-0.373889	8.19925	-4.13362	0.00273119	0.168162	-1.37086
29	22	0	A_33_P3259693	NM_001160325	128366	OR6P1	olfactory receptor, family 6, subfamily P, member 1	0.373578	5.74697	1.07224	0.312419	0.681788	-5.79867
13	61	0	A_33_P3804778	CD049825	NA			0.373426	5.79684	0.818436	0.434926	0.755392	-6.03343
163	148	0	A_21_P0000472	NR_003701	NA	SNORD58C	small nucleolar RNA, C/D box 58C	0.373411	8.37128	5.38735	0.000492032	0.0825447	0.302016
353	134	0	A_21_P0000093	NM_001177599	NA	SUCLG2	succinate-CoA ligase, GDP-forming, beta subunit	-0.373318	5.82492	-1.11069	0.29642	0.67242	-5.75882
62	99	0	A_23_P103104	NM_002405	4242	MFNG	MFNG O-fucosylpeptide 3-beta-N-acetylglucosaminyltransferase	0.3731	6.88964	1.32661	0.218363	0.618982	-5.51661
82	125	0	A_32_P46603	NM_144992	200403	VWA3B	von Willebrand factor A domain containing 3B	0.373052	5.76511	1.06005	0.317628	0.686122	-5.81108
97	11	0	A_21_P0006425	ENST00000424241	NA	XLOC_008003		-0.372884	5.7901	-1.97838	0.080327	0.462172	-4.64159
238	135	0	A_33_P3305758	NM_001747	822	CAPG	capping protein (actin filament), gelsolin-like	-0.372549	6.48461	-1.30251	0.226125	0.624666	-5.5451
280	7	0	A_21_P0012793	ENST00000509105	NA	XLOC_l2_011263		-0.371894	5.7087	-1.54681	0.157427	0.562826	-5.24155
348	152	0	A_23_P110184	NM_006745	6307	MSMO1	methylsterol monooxygenase 1	0.371674	8.14662	3.30399	0.00959135	0.251642	-2.60595
170	146	0	A_21_P0003175	TCONS_00006658	NA	XLOC_003250		-0.371544	6.1984	-1.77985	0.109913	0.507345	-4.92585
17	118	0	A_21_P0007793	THC2684861	NA	XLOC_010251		0.371445	5.96419	0.909653	0.387484	0.727781	-5.95497
6	83	0	A_21_P0012287	ENST00000433066	NA	XLOC_l2_009469		0.371301	6.11035	1.30425	0.225557	0.624148	-5.54306
277	4	0	A_19_P00319801	NR_026921	NA	LOC202181	chromosome 5 open reading frame 25 pseudogene	-0.371277	7.37619	-2.30538	0.0475034	0.398907	-4.15226
143	65	0	A_33_P3253892	A_33_P3253892	NA			0.371206	6.26628	0.906669	0.388975	0.728717	-5.95765
12	118	0	A_33_P3258478	XM_003403406	3811	KIR3DL1	killer cell immunoglobulin-like receptor, three domains, long cytoplasmic tail, 1	0.371155	6.55768	0.839582	0.423586	0.74956	-6.01586
82	145	0	A_33_P3274134	NM_001137560	441151	TMEM151B	transmembrane protein 151B	0.371096	10.2616	2.49121	0.0351712	0.365836	-3.86677
199	143	0	A_33_P3213712	A_33_P3213712	NA			-0.371027	6.51123	-1.59281	0.146786	0.552437	-5.18103
221	153	0	A_24_P14731	NM_013271	27344	PCSK1N	proprotein convertase subtilisin/kexin type 1 inhibitor	0.37084	13.8199	3.85867	0.0040998	0.192906	-1.77049
103	151	0	A_23_P930	NM_001077628	51107	APH1A	anterior pharynx defective 1 homolog A (C. elegans)	-0.370824	10.1047	-3.27267	0.0100739	0.256181	-2.65407
294	134	0	A_23_P112874	NM_004466	2262	GPC5	glypican 5	-0.370709	6.22012	-1.30104	0.226605	0.624908	-5.54683
245	4	0	A_23_P4161	ENST00000448504	22901	ARSG	arylsulfatase G	0.370632	6.2813	8.13826	2.34607e-05	0.0149256	3.1292
352	110	0	A_23_P33465	NM_024324	79174	CRELD2	cysteine-rich with EGF-like domains 2	0.370456	14.5417	8.70463	1.38407e-05	0.0101585	3.58967
160	84	0	A_23_P105524	NM_033123	89869	PLCZ1	phospholipase C, zeta 1	0.370356	5.76082	0.935716	0.374633	0.719667	-5.9313
353	68	0	A_21_P0009197	ENST00000502300	NA	XLOC_012517		-0.370219	5.85684	-1.34036	0.214038	0.615699	-5.50021
42	24	0	A_21_P0001652	TCONS_00001898	NA	XLOC_001286		0.370152	7.4399	5.01015	0.000804572	0.104617	-0.174486
325	76	0	A_23_P387630	NM_014725	9754	STARD8	StAR-related lipid transfer (START) domain containing 8	-0.37005	7.63811	-1.03914	0.326721	0.691045	-5.83211
162	146	0	A_33_P3531828	NM_020117	51520	LARS	leucyl-tRNA synthetase	0.369798	12.1576	2.24549	0.0523265	0.410406	-4.24335
102	52	0	A_21_P0013639	THC2589616	NA	XLOC_l2_015196		0.369318	6.75967	1.01265	0.338528	0.697532	-5.8583
145	149	0	A_33_P3299781	ENST00000380201	65992	DDRGK1	DDRGK domain containing 1	0.369247	9.66456	3.85666	0.00411217	0.193164	-1.77346
116	136	0	A_24_P323084	NR_038080	284185	LINC00482	long intergenic non-protein coding RNA 482	0.369242	9.31831	6.5138	0.000127072	0.0428071	1.59027
218	69	0	A_21_P0001943	ENST00000424170	NA	XLOC_001776		-0.369087	5.65573	-2.05331	0.0712692	0.446195	-4.53143
115	147	0	A_21_P0005571	TCONS_00014180	NA	XLOC_006188		0.368977	12.4902	3.70109	0.00519883	0.207237	-2.0042
84	141	0	A_24_P15502	A_24_P15502	NA			-0.368604	10.3831	-3.82972	0.00428162	0.195497	-1.8132
193	127	0	A_21_P0006070	ENST00000435092	NA	XLOC_007657		0.368598	6.05532	2.38388	0.0418412	0.384261	-4.03212
37	28	0	A_21_P0008272	ENST00000553785	NA	XLOC_010917		0.368594	5.76906	1.07598	0.310833	0.680716	-5.79484
235	33	0	A_23_P111240	NM_014721	9749	PHACTR2	phosphatase and actin regulator 2	-0.368499	8.25676	-4.20383	0.00246635	0.1613	-1.27059
287	158	0	A_33_P3228533	A_33_P3228533	NA			-0.368416	5.78251	-1.38654	0.200038	0.603592	-5.44432
16	13	0	A_21_P0011105	THC2784294	NA	XLOC_l2_003593		0.368172	6.01021	1.11749	0.293657	0.670243	-5.75166
223	75	0	A_23_P359540	NM_003540	8361	HIST1H4F	histone cluster 1, H4f	0.368159	12.057	3.20832	0.0111464	0.266271	-2.75317
84	163	0	A_21_P0009686	TCONS_00026908	NA	XLOC_012981		0.368065	5.95185	1.26807	0.237617	0.632896	-5.58521
228	94	0	A_21_P0001312	TCONS_00000966	NA	XLOC_000225		-0.368053	5.49772	-1.25779	0.241141	0.635677	-5.59704
98	13	0	A_32_P437876	NR_029192	100133315	LOC100133315	transient receptor potential cation channel, subfamily C, member 2-like	0.367949	7.27505	2.52071	0.0335318	0.360115	-3.82114
198	130	0	A_24_P157156	NM_001080539	284992	CCDC150	coiled-coil domain containing 150	0.367917	8.28936	2.85498	0.0195582	0.309208	-3.30143
165	134	0	A_21_P0001260	TCONS_00000830	NA	XLOC_000037		-0.367868	5.49977	-1.68733	0.126934	0.53021	-5.05381
240	152	0	A_21_P0011580	TCONS_l2_00011143	NA	XLOC_l2_006025		0.367719	8.45187	2.93329	0.0172517	0.301641	-3.17952
232	164	0	A_21_P0002942	TCONS_00005987	NA	XLOC_002614		-0.367709	5.98673	-1.35402	0.209812	0.611513	-5.4838
278	82	0	A_33_P3368750	NM_001104554	54852	PAQR5	progestin and adipoQ receptor family member V	0.367595	8.33097	3.04428	0.0144524	0.287516	-3.00704
256	4	0	A_33_P3423791	NM_198182	29841	GRHL1	grainyhead-like 1 (Drosophila)	-0.367528	6.22229	-1.94361	0.084894	0.469805	-4.69221
42	99	0	A_24_P687326	NR_024366	286333	LINC00256A	long intergenic non-protein coding RNA 256A	0.367362	6.84211	1.40329	0.195158	0.600078	-5.42375
288	161	0	A_23_P113553	NM_001011544	4110	MAGEA11	melanoma antigen family A, 11	-0.367335	5.84744	-1.50776	0.166996	0.573356	-5.29214
211	69	0	A_23_P167983	ENST00000314088	8334	HIST1H2AC	histone cluster 1, H2ac	-0.367318	9.67652	-4.79317	0.00107754	0.119338	-0.459132
253	49	0	A_21_P0002673	TCONS_00005222	NA	XLOC_002244		-0.367283	5.63784	-1.45783	0.179979	0.585706	-5.35575
177	56	0	A_23_P92536	NM_000087	1259	CNGA1	cyclic nucleotide gated channel alpha 1	-0.367125	5.87614	-1.17928	0.269495	0.653638	-5.68517
230	164	0	A_21_P0012624	TCONS_l2_00020810	NA	XLOC_l2_010880		-0.367117	6.02226	-1.597	0.145851	0.551826	-5.17549
11	61	0	A_33_P3859897	ENST00000418161	NA			0.367072	5.76424	0.890451	0.397151	0.733922	-5.97206
138	124	0	A_24_P460419	NM_001145077	390205	LRRC10B	leucine rich repeat containing 10B	0.367046	7.8517	1.80637	0.105439	0.500925	-4.8886
215	11	0	A_21_P0007321	TCONS_00019584	NA	XLOC_009382		0.366886	8.17743	2.02812	0.0741995	0.451592	-4.56863
86	155	0	A_21_P0008046	AK091998	NA	AHSA2	AHA1, activator of heat shock 90kDa protein ATPase homolog 2 (yeast)	0.36685	6.68285	1.78933	0.108294	0.505061	-4.91257
9	152	0	A_21_P0002671	ENST00000448595	NA	XLOC_002221		0.36674	5.92755	0.839345	0.423712	0.749621	-6.01606
216	70	0	A_23_P110299	NM_001059	6870	TACR3	tachykinin receptor 3	-0.366726	5.8662	-1.30223	0.226217	0.624724	-5.54544
215	41	0	A_21_P0002243	TCONS_00003744	NA	XLOC_001539		0.366644	5.46761	1.60303	0.144511	0.550313	-5.16746
4	44	0	A_32_P516818	NM_001243729	152078	C3orf55	chromosome 3 open reading frame 55	0.366612	6.08786	1.18261	0.268239	0.65244	-5.68152
85	68	0	A_21_P0002213	TCONS_00003672	NA	XLOC_001465		0.366499	5.96506	1.83607	0.100632	0.494666	-4.8466
34	2	0	A_23_P102634	NM_080827	140870	WFDC6	WAP four-disulfide core domain 6	0.366401	5.94641	1.26236	0.239569	0.634362	-5.59179
40	53	0	A_19_P00315603	TCONS_l2_00030536	NA	XLOC_l2_015760		-0.36625	10.1276	-4.09077	0.00290766	0.170729	-1.43243
354	123	0	A_23_P23074	NM_006417	10561	IFI44	interferon-induced protein 44	-0.366245	10.2117	-6.39048	0.00014621	0.0460803	1.4587
248	150	0	A_33_P3781094	NR_037585	100505929	C21orf37	chromosome 21 open reading frame 37	-0.36617	5.66415	-1.50318	0.168152	0.57491	-5.29803
296	164	0	A_19_P00800638	NR_038342	NA	LOC100505875	uncharacterized LOC100505875	-0.366101	14.0779	-2.33629	0.0451884	0.392944	-4.10504
259	49	0	A_21_P0012861	TCONS_l2_00022637	NA	XLOC_l2_011854		-0.366019	5.62052	-1.33191	0.216688	0.617574	-5.51031
30	157	0	A_21_P0005255	ENST00000446053	NA	XLOC_006220		0.365638	6.03475	1.7916	0.107909	0.504672	-4.90937
44	98	0	A_21_P0001486	ENST00000418471	NA	XLOC_000762		0.365561	8.43465	3.89253	0.00389755	0.188959	-1.7207
45	14	0	A_21_P0004424	TCONS_00010405	NA	XLOC_004924		0.365556	5.79392	0.864196	0.410646	0.741928	-5.99494
80	149	0	A_33_P3332533	NR_040096	643339	LOC643339	uncharacterized LOC643339	0.365526	6.52057	1.16016	0.276792	0.658516	-5.70602
198	52	0	A_19_P00317597	AK309717	NA	XLOC_012826		-0.365435	9.47895	-0.286717	0.781032	0.922158	-6.33837
189	131	0	A_33_P3220929	NM_138334	126119	JOSD2	Josephin domain containing 2	-0.365108	7.26315	-1.8887	0.0926146	0.48297	-4.77149
115	109	0	A_33_P3380196	BC015533	10142	AKAP9	A kinase (PRKA) anchor protein (yotiao) 9	0.365041	5.91764	0.88935	0.397711	0.734143	-5.97303
301	141	0	A_32_P10133	NR_023388	100169750	PRINS	psoriasis associated RNA induced by stress (non-protein coding)	-0.364957	6.96352	-2.6238	0.0283833	0.343767	-3.66125
226	26	0	A_33_P3218564	A_33_P3218564	NA			0.364938	15.3383	5.03256	0.000780964	0.103512	-0.145529
256	116	0	A_23_P165136	NM_145256	126364	LRRC25	leucine rich repeat containing 25	-0.364863	5.67591	-2.79039	0.0216972	0.319469	-3.40204
98	148	0	A_33_P3243622	NM_015726	50717	DCAF8	DDB1 and CUL4 associated factor 8	0.364837	8.31761	3.68305	0.00534325	0.208787	-2.03116
75	140	0	A_32_P154223	XR_109654	100505683	LOC100505683	uncharacterized LOC100505683	0.364723	6.9401	2.25138	0.0518315	0.410015	-4.23441
59	143	0	A_21_P0012230	ENST00000452028	NA	XLOC_l2_009182		0.364636	5.80321	1.11977	0.292737	0.669593	-5.74926
248	109	0	A_33_P3241388	NM_021196	57835	SLC4A5	solute carrier family 4, sodium bicarbonate cotransporter, member 5	-0.364569	6.70849	-6.07858	0.000210247	0.0556084	1.1158
10	156	0	A_33_P3409844	NM_015888	51361	HOOK1	hook homolog 1 (Drosophila)	0.364477	8.0896	4.06796	0.00300651	0.172902	-1.46531
305	80	0	A_24_P141786	NM_001681	488	ATP2A2	ATPase, Ca++ transporting, cardiac muscle, slow twitch 2	-0.364314	10.2024	-4.52586	0.00155891	0.135808	-0.820339
5	142	0	A_23_P30122	NM_000586	3558	IL2	interleukin 2	0.364302	6.06721	1.43961	0.18493	0.590768	-5.37864
36	27	0	A_24_P326398	NM_173689	286204	CRB2	crumbs homolog 2 (Drosophila)	0.364216	5.77322	1.17057	0.272798	0.656063	-5.6947
284	3	0	A_21_P0008524	TCONS_00023050	NA	XLOC_010922		-0.363893	5.49638	-2.00806	0.0766145	0.456014	-4.59812
177	72	0	A_21_P0009580	TCONS_00026561	NA	XLOC_012881		0.36384	5.70481	1.40144	0.195692	0.600498	-5.42603
287	72	0	A_33_P3385436	NM_001029869	153770	PLAC8L1	PLAC8-like 1	-0.363579	8.17568	-4.83984	0.00101133	0.116865	-0.397256
194	48	0	A_21_P0006218	TCONS_00016142	NA	XLOC_007538		-0.363577	5.46314	-1.41303	0.192368	0.597584	-5.41172
7	160	0	A_23_P74547	NM_001040033	963	CD53	CD53 molecule	0.363566	5.97222	1.89874	0.0911549	0.480737	-4.75706
217	57	0	A_33_P3241021	ENST00000416624	969	CD69	CD69 molecule	-0.363155	5.63103	-1.25668	0.241522	0.635736	-5.59831
191	158	0	A_23_P438	NM_017773	54900	LAX1	lymphocyte transmembrane adaptor 1	-0.363031	5.58055	-1.55351	0.155837	0.561366	-5.2328
191	40	0	A_33_P3317005	NM_000578	6556	SLC11A1	solute carrier family 11 (proton-coupled divalent metal ion transporters), member 1	0.363002	5.53925	1.9635	0.0822518	0.465735	-4.66329
3	29	0	A_33_P3272189	NM_032718	84804	MFSD9	major facilitator superfamily domain containing 9	0.362952	10.037	6.54882	0.00012215	0.0421577	1.62722
140	99	0	A_21_P0005632	AK130001	NA	XLOC_006857		0.362888	5.72018	0.930145	0.377354	0.720998	-5.93641
225	161	0	A_24_P364057	NM_032930	85016	C11orf70	chromosome 11 open reading frame 70	-0.362856	6.22261	-1.13137	0.288086	0.665971	-5.73696
42	149	0	A_24_P285522	NM_003618	8491	MAP4K3	mitogen-activated protein kinase kinase kinase kinase 3	-0.362823	8.13173	-2.92538	0.0174714	0.301641	-3.19183
148	79	0	A_21_P0011378	TCONS_l2_00009129	NA	XLOC_l2_004951		-0.362371	5.5259	-1.82643	0.102169	0.49575	-4.86026
215	68	0	A_23_P64828	NM_002534	4938	OAS1	2'-5'-oligoadenylate synthetase 1, 40/46kDa	-0.362166	7.25665	-2.88394	0.0186705	0.305966	-3.25634
104	140	0	A_33_P3358844	NP511085	NA			-0.362152	5.61578	-2.06375	0.0700887	0.445498	-4.51598
1	87	0	A_32_P199252	NM_001017963	3320	HSP90AA1	heat shock protein 90kDa alpha (cytosolic), class A member 1	0.362144	14.9206	2.78186	0.0219969	0.320948	-3.41532
61	100	0	A_23_P114061	NM_001007471	80036	TRPM3	transient receptor potential cation channel, subfamily M, member 3	0.362069	6.08066	1.00035	0.344119	0.70114	-5.87028
11	71	0	A_19_P00330048	TCONS_00020284	NA	XLOC_009628		0.361934	6.34526	1.08727	0.306084	0.67846	-5.78321
275	2	0	A_21_P0002874	ENST00000490139	NA	XLOC_003220		-0.361921	6.45035	-1.35145	0.210602	0.612732	-5.4869
121	86	0	A_21_P0012509	ENST00000498616	NA	XLOC_l2_009979		-0.361751	5.65655	-2.5385	0.0325804	0.357174	-3.79359
86	4	0	A_24_P704878	A_24_P704878	NA			0.361649	6.02513	1.24937	0.244058	0.637657	-5.60668
182	68	0	A_23_P145761	NM_005738	10124	ARL4A	ADP-ribosylation factor-like 4A	0.361304	10.8522	4.54105	0.00152609	0.134951	-0.799492
23	101	0	A_21_P0009678	TCONS_00026873	NA	XLOC_012931		0.361278	5.80518	0.931269	0.376804	0.720743	-5.93538
365	161	0	A_23_P115842	NM_018237	55749	CCAR1	cell division cycle and apoptosis regulator 1	-0.360759	11.4989	-6.53912	0.000123493	0.0421577	1.617
190	16	0	A_33_P3398187	A_33_P3398187	NA			-0.360703	6.12259	-0.679516	0.514461	0.798361	-6.13911
17	5	0	A_21_P0003704	THC2771827	NA	XLOC_003839		0.360647	7.69328	0.949279	0.368071	0.715369	-5.91877
141	57	0	A_24_P334456	NM_197941	11174	ADAMTS6	ADAM metallopeptidase with thrombospondin type 1 motif, 6	0.360547	6.10071	2.51015	0.0341098	0.361475	-3.83749
157	69	0	A_24_P388252	NM_000945	5534	PPP3R1	protein phosphatase 3, regulatory subunit B, alpha	-0.36054	9.8514	-1.82367	0.102614	0.496565	-4.86418
41	109	0	A_33_P3388080	CN263935	731223	LOC731223	uncharacterized LOC731223	0.360401	7.88807	1.06213	0.316734	0.685124	-5.80897
147	151	0	A_23_P348636	NM_001454	2302	FOXJ1	forkhead box J1	-0.36022	7.48095	-4.45863	0.00171344	0.140667	-0.912981
287	162	0	A_21_P0008277	ENST00000500016	NA	XLOC_011062		-0.359957	6.06344	-1.57697	0.150375	0.555528	-5.20198
101	90	0	A_24_P84873	A_24_P84873	NA			0.359894	12.4557	3.51186	0.00694405	0.226267	-2.28886
269	119	0	A_21_P0012209	ENST00000507941	NA	XLOC_l2_008975		-0.359846	5.59845	-1.10036	0.300652	0.675111	-5.76962
305	114	0	A_32_P2634	CR604707	NA			0.359845	9.34773	3.72702	0.00499841	0.203833	-1.96552
277	146	0	A_21_P0013318	NM_001142414	NA	CRCP	CGRP receptor component	0.359833	10.4175	2.58108	0.0304124	0.351728	-3.72758
354	63	0	A_23_P503127	NM_145733	55964	2003-09-01	septin 3	0.35975	9.97849	4.42043	0.00180853	0.14216	-0.965953
322	140	0	A_21_P0010305	TCONS_00029195	NA	XLOC_013863		-0.359621	5.73465	-1.10647	0.298144	0.673644	-5.76325
262	59	0	A_21_P0014843	XR_132713	NA	LOC100507149		-0.359269	8.30014	-3.43317	0.00784261	0.234282	-2.40841
122	12	0	A_33_P3417081	NR_003574	650655	ABCA17P	ATP-binding cassette, sub-family A (ABC1), member 17, pseudogene	0.359164	5.72663	1.16117	0.276405	0.658404	-5.70493
148	154	0	A_19_P00318409	NR_028272	NA	NEAT1	nuclear paraspeckle assembly transcript 1 (non-protein coding)	0.35911	8.00184	3.148	0.01226	0.275491	-2.84634
163	103	0	A_21_P0005385	TCONS_00013465	NA	XLOC_006117		-0.359064	5.44878	-3.41752	0.00803535	0.236421	-2.43226
21	31	0	A_33_P3256113	NR_027026	728411	GUSBP1	glucuronidase, beta pseudogene 1	-0.358657	7.64739	-5.35883	0.000510314	0.0840689	0.266796
8	83	0	A_23_P113471	NM_174912	158584	FAAH2	fatty acid amide hydrolase 2	0.358606	6.70305	1.10461	0.298906	0.674204	-5.76519
184	21	0	A_24_P298587	ENST00000531225	NA			0.358463	8.93437	5.92904	0.000251346	0.0592702	0.946129
332	123	0	A_21_P0010601	NM_014675	NA	CROCC	ciliary rootlet coiled-coil, rootletin	-0.358182	7.89199	-3.72786	0.00499208	0.203833	-1.96427
249	150	0	A_21_P0002486	TCONS_00004370	NA	XLOC_002253		-0.358025	5.67739	-1.30587	0.225027	0.623905	-5.54115
51	101	0	A_24_P303874	XR_109856	157927	C9orf62	chromosome 9 open reading frame 62	0.357938	14.428	2.18698	0.0575026	0.421363	-4.3318
135	58	0	A_33_P3514487	NM_198481	284415	VSTM1	V-set and transmembrane domain containing 1	-0.357777	5.79659	-1.86474	0.0961864	0.488351	-4.80578
74	60	0	A_23_P1102	NM_001100	58	ACTA1	actin, alpha 1, skeletal muscle	-0.357767	8.12764	-3.12395	0.0127355	0.279758	-2.88354
12	5	0	A_24_P383478	NM_000125	2099	ESR1	estrogen receptor 1	0.357732	7.60189	2.14667	0.0613557	0.429395	-4.39238
100	123	0	A_24_P389916	NM_005512	2615	LRRC32	leucine rich repeat containing 32	0.357672	7.66064	1.46001	0.179394	0.585117	-5.353
239	28	0	A_33_P3210069	A_33_P3210069	NA			-0.357593	7.99962	-5.22683	0.000605072	0.092312	0.102081
15	55	0	A_24_P330263	NM_003991	1910	EDNRB	endothelin receptor type B	0.357569	5.97941	1.17004	0.273003	0.656063	-5.69528
271	90	0	A_21_P0010385	ENST00000451118	NA	XLOC_014402		-0.357545	5.72967	-0.964663	0.360729	0.710198	-5.90437
250	37	0	A_23_P96478	NM_182681	265	AMELX	amelogenin, X-linked	-0.357096	6.24232	-1.41867	0.190769	0.596295	-5.40474
136	68	0	A_33_P3313250	NM_001004477	128367	OR10X1	olfactory receptor, family 10, subfamily X, member 1	0.35694	5.84973	1.10389	0.299202	0.674407	-5.76595
347	127	0	A_33_P3287028	NM_001788	989	2007-09-01	septin 7	0.356643	12.0463	2.78333	0.0219448	0.32077	-3.41302
247	60	0	A_21_P0006658	THC2503064	NA	XLOC_008405		-0.356587	5.86412	-1.22929	0.251135	0.641576	-5.62949
21	77	0	A_21_P0009077	TCONS_00024751	NA	XLOC_012036		0.35658	6.94568	1.0171	0.336525	0.696381	-5.85394
168	87	0	A_21_P0003976	ENST00000504998	NA	XLOC_004309		0.356541	5.49888	2.9795	0.0160239	0.295501	-3.10766
290	155	0	A_33_P3410874	AI792396	NA			-0.356453	5.58182	-1.50291	0.168221	0.57491	-5.29838
83	93	0	A_21_P0002022	ENST00000412381	NA	XLOC_001999		0.35606	6.23318	0.849724	0.418221	0.746312	-6.0073
134	68	0	A_21_P0006118	TCONS_00016529	NA	XLOC_007263		0.356041	5.65808	1.36514	0.206424	0.609241	-5.47037
170	96	0	A_33_P3303742	ENST00000439905	NA			-0.355787	5.9839	-4.08532	0.00293098	0.171413	-1.44029
264	139	0	A_33_P3771741	ENST00000494840	NA			-0.355667	5.68607	-1.11299	0.295484	0.671566	-5.7564
325	5	0	A_23_P116765	NM_002289	3906	LALBA	lactalbumin, alpha-	-0.355663	5.54888	-0.996025	0.3461	0.701977	-5.87446
366	69	0	A_32_P225854	NM_181784	200734	SPRED2	sprouty-related, EVH1 domain containing 2	-0.355323	10.552	-3.58868	0.00617082	0.219026	-2.1728
356	100	0	A_23_P108734	NM_018436	55821	ALLC	allantoicase	-0.35529	7.61653	-4.43858	0.00176266	0.141198	-0.940753
49	89	0	A_33_P3263902	NM_005962	4601	MXI1	MAX interactor 1	0.354573	7.75226	2.96135	0.0164951	0.298685	-3.13588
323	97	0	A_19_P00805339	AK022898	NA	Q6UWM8		-0.354478	6.06901	-1.9449	0.0847203	0.469649	-4.69034
285	51	0	A_23_P35354	NM_018294	55280	CWF19L1	CWF19-like 1, cell cycle control (S. pombe)	-0.354355	10.2479	-5.1041	0.000710473	0.0990899	-0.0536278
227	14	0	A_23_P131534	NM_007227	11250	GPR45	G protein-coupled receptor 45	-0.354246	6.2875	-7.81218	3.22182e-05	0.017811	2.84738
121	146	0	A_21_P0012488	ENST00000425894	NA	XLOC_l2_009613		-0.354133	5.60893	-1.36383	0.206822	0.609453	-5.47196
167	116	0	A_32_P206899	NM_020877	146754	DNAH2	dynein, axonemal, heavy chain 2	-0.354033	7.10419	-6.4715	0.000133309	0.0439746	1.54539
280	6	0	A_23_P100220	NM_024939	80004	ESRP2	epithelial splicing regulatory protein 2	-0.353967	7.17716	-1.5496	0.156763	0.562152	-5.23791
281	125	0	A_21_P0004476	ENST00000519603	NA	XLOC_005105		-0.35394	5.67305	-1.25497	0.242115	0.636106	-5.60028
24	36	0	A_24_P233078	NR_003064	23615	PYY2	peptide YY, 2 (seminalplasmin)	0.353914	11.4781	2.45079	0.0375485	0.372747	-3.92917
268	37	0	A_21_P0011185	TCONS_l2_00007207	NA	XLOC_l2_003992		-0.353695	6.85016	-1.29702	0.227923	0.625544	-5.55154
191	78	0	A_33_P3353365	ENST00000397076	10050	SLC17A4	solute carrier family 17 (sodium phosphate), member 4	-0.353674	6.31079	-1.34251	0.213369	0.61489	-5.49764
159	145	0	A_24_P380679	NM_182597	286006	C7orf53	chromosome 7 open reading frame 53	-0.353587	9.44878	-4.50447	0.00160639	0.138913	-0.849734
147	51	0	A_21_P0010201	ENST00000450928	NA	XLOC_014060		-0.353476	5.8073	-1.38796	0.19962	0.603099	-5.44258
111	102	0	A_33_P3229147	ENST00000526741	NA			0.353332	6.40379	1.28341	0.232438	0.62883	-5.56743
108	131	0	A_21_P0008781	ENST00000554440	NA	XLOC_011583		0.35279	6.15193	1.81755	0.103605	0.498599	-4.87283
116	114	0	A_21_P0013123	ENST00000439891	NA	XLOC_l2_012388		0.352729	7.70232	3.5028	0.00704181	0.227356	-2.3026
332	154	0	A_23_P54846	NM_014685	9709	HERPUD1	homocysteine-inducible, endoplasmic reticulum stress-inducible, ubiquitin-like domain member 1	0.352679	13.913	4.21981	0.00240996	0.160372	-1.24786
293	155	0	A_33_P3345678	A_33_P3345678	NA			-0.352551	5.62538	-1.18503	0.26733	0.651877	-5.67886
124	103	0	A_23_P138938	NM_000926	5241	PGR	progesterone receptor	-0.352515	5.77178	-2.43089	0.0387772	0.375201	-3.95983
268	38	0	A_21_P0007734	TCONS_00020861	NA	XLOC_010144		-0.352382	5.89978	-1.02155	0.334524	0.694832	-5.84956
174	119	0	A_23_P90944	NM_002976	6332	SCN7A	sodium channel, voltage-gated, type VII, alpha	-0.352355	5.81733	-1.1948	0.263683	0.649887	-5.66807
13	78	0	A_33_P3263027	ENST00000370707	NA			0.352311	7.0778	1.53615	0.159989	0.566216	-5.25543
243	95	0	A_21_P0007990	ENST00000432331	NA	XLOC_010585		-0.352298	5.77935	-1.33184	0.216708	0.617602	-5.51038
64	162	0	A_21_P0008123	TCONS_00021911	NA	XLOC_010504		0.352148	5.9409	1.1828	0.268167	0.652357	-5.68131
131	21	0	A_23_P105465	NM_004072	1240	CMKLR1	chemokine-like receptor 1	-0.352131	6.07071	-2.03182	0.0737619	0.450789	-4.56317
120	108	0	A_21_P0008299	THC2643003	NA	XLOC_010767		0.352106	6.14872	0.939919	0.372591	0.718391	-5.92743
118	4	0	A_24_P340128	NM_178129	286530	P2RY8	purinergic receptor P2Y, G-protein coupled, 8	0.352094	5.74765	1.51852	0.164308	0.570599	-5.27827
198	56	0	A_33_P3269718	NM_001159508	3712	IVD	isovaleryl-CoA dehydrogenase	0.352092	12.0792	5.39591	0.000486683	0.0821165	0.312565
213	59	0	A_24_P204819	NM_005840	10251	SPRY3	sprouty homolog 3 (Drosophila)	-0.352054	5.98799	-1.51336	0.165593	0.571728	-5.28493
272	117	0	A_33_P3333337	NM_001164213	23143	LRCH1	leucine-rich repeats and calponin homology (CH) domain containing 1	-0.352033	8.10599	-1.77555	0.110655	0.508397	-4.93187
351	3	0	A_33_P3390027	ENST00000405068	23265	EXOC7	exocyst complex component 7	0.351982	11.2914	4.64471	0.00132114	0.127195	-0.658307
65	102	0	A_21_P0008876	BC040927	NA	XLOC_011801		0.351716	5.79	0.689421	0.508505	0.794579	-6.13215
89	4	0	A_33_P3421178	ENST00000552367	NA			0.351683	8.29021	2.90363	0.0180906	0.304188	-3.22569
335	47	0	A_32_P30831	NR_040058	100505648	LOC100505648	uncharacterized LOC100505648	0.351609	8.57124	2.96815	0.016317	0.297541	-3.12531
343	45	0	A_23_P108734	NM_018436	55821	ALLC	allantoicase	-0.351559	7.59082	-4.23679	0.0023516	0.158242	-1.22376
204	37	0	A_21_P0005932	ENST00000521408	NA	XLOC_006745		-0.351408	5.60318	-2.28584	0.049027	0.403521	-4.18204
189	101	0	A_33_P3313258	NM_031921	83858	ATAD3B	ATPase family, AAA domain containing 3B	0.351212	10.8942	3.55985	0.00644985	0.222961	-2.21628
214	161	0	A_23_P90407	NM_012114	23581	CASP14	caspase 14, apoptosis-related cysteine peptidase	-0.351122	6.19198	-1.26341	0.239207	0.634024	-5.59057
221	101	0	A_19_P00803019	XR_110300	NA	LOC100506965	uncharacterized LOC100506965	-0.351068	9.06058	-2.74752	0.0232473	0.326121	-3.46879
138	133	0	A_32_P176018	NM_030812	81569	ACTL8	actin-like 8	-0.351005	6.05129	-2.75481	0.0229758	0.325111	-3.45744
11	33	0	A_21_P0008693	TCONS_00023547	NA	XLOC_011380		0.350871	5.9127	0.89856	0.393048	0.731251	-5.96488
266	59	0	A_21_P0014935	ENST00000426200	NA	LOC100505641		0.350648	12.765	5.68563	0.00033824	0.0687037	0.662475
101	47	0	A_24_P53282	NM_001304	1362	CPD	carboxypeptidase D	-0.350626	10.0374	-3.83236	0.00426467	0.195497	-1.80929
35	117	0	A_23_P25224	NM_003651	8531	CSDA	cold shock domain protein A	-0.350519	7.01723	-4.12684	0.00275836	0.168319	-1.38059
164	19	0	A_21_P0002453	TCONS_00004286	NA	XLOC_002131		-0.350334	6.45949	-1.51622	0.164881	0.571188	-5.28125
73	112	0	A_23_P368740	NM_032019	83933	HDAC10	histone deacetylase 10	0.350266	8.86463	4.45976	0.00171072	0.140667	-0.911424
16	162	0	A_21_P0008615	BX088900	NA	XLOC_011214		0.350165	5.87948	1.6178	0.14128	0.547235	-5.14776
239	107	0	A_23_P379475	NM_014762	1718	DHCR24	24-dehydrocholesterol reductase	0.350082	12.3956	8.99939	1.06323e-05	0.00821445	3.8156
160	54	0	A_21_P0003686	TCONS_00008347	NA	XLOC_003794		0.349963	5.76899	1.2652	0.238594	0.633506	-5.58851
379	113	0	A_33_P3234667	NM_003439	7586	ZKSCAN1	zinc finger with KRAB and SCAN domains 1	0.349668	12.2647	3.43982	0.00776211	0.234031	-2.39828
136	69	0	A_21_P0009101	TCONS_00024847	NA	XLOC_011730		0.349644	5.73168	1.02348	0.333662	0.694363	-5.84766
165	17	0	A_21_P0012303	NR_001591	NA	psiTPTE22	TPTE pseudogene	0.349574	5.80046	0.964835	0.360648	0.710166	-5.90421
94	44	0	A_23_P79015	NM_199037	6324	SCN1B	sodium channel, voltage-gated, type I, beta	0.349507	6.0037	1.02879	0.331299	0.693085	-5.84241
297	125	0	A_21_P0002881	ENST00000466206	NA	XLOC_003263		-0.349385	6.1726	-1.23838	0.247911	0.639398	-5.6192
208	13	0	A_32_P109683	NM_001015038	389860	PAGE2B	P antigen family, member 2B	-0.349292	6.24409	-2.29969	0.0479425	0.399977	-4.16094
15	67	0	A_33_P3355599	NM_018940	56129	PCDHB7	protocadherin beta 7	0.349199	5.91399	1.13212	0.287787	0.665736	-5.73616
330	102	0	A_23_P117298	NM_000131	2155	F7	coagulation factor VII (serum prothrombin conversion accelerator)	0.349014	6.42881	1.85374	0.0978699	0.490661	-4.82148
218	22	0	A_33_P3388574	ENST00000378417	NA			-0.348705	5.66594	-1.38655	0.200035	0.603592	-5.44431
83	23	0	A_33_P3410445	A_33_P3410445	NA			0.348489	5.82678	0.930646	0.377108	0.720931	-5.93595
252	44	0	A_33_P3351904	NM_031861	56138	PCDHA11	protocadherin alpha 11	-0.348376	5.65478	-1.68763	0.126876	0.530082	-5.05341
134	39	0	A_19_P00322349	ENST00000511431	NA	Q20ZE8		0.348184	6.09117	1.65457	0.13352	0.538305	-5.09833
69	113	0	A_32_P331052	NM_080833	140893	C20orf151	chromosome 20 open reading frame 151	0.348142	6.39978	0.854607	0.415654	0.744886	-6.00315
214	130	0	A_23_P152995	NM_001045	6532	SLC6A4	solute carrier family 6 (neurotransmitter transporter, serotonin), member 4	-0.348118	6.28495	-1.84479	0.0992605	0.492461	-4.83422
221	86	0	A_21_P0008113	TCONS_00021896	NA	XLOC_010490		-0.348021	5.83449	-1.70093	0.124289	0.526236	-5.03521
169	122	0	A_21_P0010009	TCONS_00028324	NA	XLOC_013666		-0.347978	5.95216	-2.57509	0.0307085	0.352712	-3.73688
147	11	0	A_21_P0010803	NR_040079	NA	LOC399715	uncharacterized LOC399715	-0.347969	5.73149	-2.10064	0.0660644	0.438812	-4.46117
87	58	0	A_21_P0012215	ENST00000427022	NA	XLOC_l2_009050		0.347952	6.09193	1.40942	0.193399	0.598525	-5.41619
216	68	0	A_33_P3257643	ENST00000409464	284071	C17orf104	chromosome 17 open reading frame 104	-0.347945	6.87264	-1.21959	0.254611	0.644305	-5.64041
287	57	0	A_23_P157865	NM_002160	3371	TNC	tenascin C	-0.347764	10.1212	-3.80248	0.00446045	0.197069	-1.85347
139	134	0	A_33_P3316147	NM_001005504	441308	OR4F21	olfactory receptor, family 4, subfamily F, member 21	-0.347659	5.8467	-2.87554	0.0189235	0.306908	-3.26941
155	32	0	A_24_P160401	NM_178181	64866	CDCP1	CUB domain containing protein 1	0.34759	5.7421	0.979701	0.353658	0.706222	-5.89013
378	71	0	A_33_P3267356	ENST00000338435	2744	GLS	glutaminase	-0.347546	10.3563	-1.84048	0.0999365	0.493627	-4.84035
382	97	0	A_23_P110184	NM_006745	6307	MSMO1	methylsterol monooxygenase 1	0.347491	8.50386	3.40986	0.00813159	0.236719	-2.44395
22	75	0	A_21_P0003288	ENST00000479244	NA	XLOC_003176		0.347386	5.58995	1.07642	0.310649	0.680716	-5.79439
270	89	0	A_19_P00316985	NR_026807	NA	LINC00472	long intergenic non-protein coding RNA 472	-0.347384	6.21374	-1.76966	0.111678	0.510076	-4.9401
54	70	0	A_21_P0004938	TCONS_00011947	NA	XLOC_005460		0.347365	6.21977	2.02535	0.0745279	0.451745	-4.5727
113	41	0	A_21_P0001397	TCONS_00001218	NA	XLOC_000490		-0.347333	7.35044	-3.62989	0.00579388	0.21566	-2.11081
203	62	0	A_32_P40288	NM_052913	114801	TMEM200A	transmembrane protein 200A	-0.347251	5.57965	-2.39725	0.0409461	0.381315	-4.01158
137	24	0	A_21_P0002618	TCONS_00004943	NA	XLOC_001743		0.347242	6.1089	0.533081	0.607308	0.844866	-6.23125
131	84	0	A_23_P1102	NM_001100	58	ACTA1	actin, alpha 1, skeletal muscle	-0.347085	8.31153	-3.2036	0.0112297	0.267127	-2.76046
[truncated: 56,718 more rows]

## Sheet: GOBP_all
GOBPID	Term	Pvalue	OddsRatio	ExpCount	Count	Size	Genes
GO:0035914	skeletal muscle cell differentiation	4.41106e-05	14.5415	0	5	98	EGR2, HLF, BTG2, NUPR1, BHLHE41
GO:0008203	cholesterol metabolic process	0.000106932	11.9511	0	5	118	MVK, DHCR24, INSIG1, LDLR, APOL1
GO:0016125	sterol metabolic process	0.00017483	10.7083	1	5	131	MVK, DHCR24, INSIG1, LDLR, APOL1
GO:0045071	negative regulation of viral genome replication	0.000429671	23.092	0	3	37	HMGA2, ISG20, ISG15
GO:0021983	pituitary gland development	0.000670919	19.62	0	3	43	LHX3, HMGA2, OTP
GO:0006695	cholesterol biosynthetic process	0.000717972	19.1401	0	3	44	MVK, DHCR24, INSIG1
GO:0048525	negative regulation of viral process	0.000927061	17.4339	0	3	48	HMGA2, ISG20, ISG15
GO:0016126	sterol biosynthetic process	0.00104462	16.6897	0	3	50	MVK, DHCR24, INSIG1
GO:0007492	endoderm development	0.00123796	15.6851	0	3	53	HNF1B, ARC, HMGA2
GO:0045069	regulation of viral genome replication	0.00130708	15.3765	0	3	54	HMGA2, ISG20, ISG15
GO:0035270	endocrine system development	0.00185787	8.34121	1	4	131	LHX3, HMGA2, OTP, HNF1B
GO:0007519	skeletal muscle tissue development	0.00187625	6.2072	1	5	221	EGR2, HLF, BTG2, NUPR1, BHLHE41
GO:0060538	skeletal muscle organ development	0.00214983	6.00939	1	5	228	EGR2, HLF, BTG2, NUPR1, BHLHE41
GO:0006026	aminoglycan catabolic process	0.00233087	12.4372	0	3	66	OVGP1, LYG1, VCAN
GO:0042692	muscle cell differentiation	0.002422	4.82458	1	6	343	EGR2, HLF, BTG2, NUPR1, BHLHE41, CDH15
GO:0019079	viral genome replication	0.00253836	12.0529	0	3	68	HMGA2, ISG20, ISG15
GO:0035987	endodermal cell differentiation	0.00257881	30.2752	0	2	19	HNF1B, HMGA2
GO:0021536	diencephalon development	0.00275694	11.6915	0	3	70	LHX3, HMGA2, OTP
GO:0009303	rRNA transcription	0.00285799	28.5913	0	2	20	TCOF1, BRF1
GO:0043901	negative regulation of multi-organism process	0.00310602	11.1881	0	3	73	HMGA2, ISG20, ISG15
GO:0008045	motor neuron axon guidance	0.00315073	27.0846	0	2	21	EGR2, LHX3
GO:0043069	negative regulation of programmed cell death	0.003781	3.49266	3	8	640	DHCR24, HMGA2, FAS, HNF1B, BTG2, LHX3, BHLHE23, PROC
GO:0008202	steroid metabolic process	0.00430234	5.08107	1	5	268	MVK, DHCR24, INSIG1, LDLR, APOL1
GO:0051146	striated muscle cell differentiation	0.00437059	5.06146	1	5	269	EGR2, HLF, BTG2, NUPR1, BHLHE41
GO:0060548	negative regulation of cell death	0.00489168	3.3377	3	8	668	DHCR24, HMGA2, FAS, HNF1B, BTG2, LHX3, BHLHE23, PROC
GO:0007420	brain development	0.00509375	3.64197	2	7	531	EGR2, EN2, HNF1B, BTG2, LHX3, HMGA2, OTP
GO:0048519	negative regulation of biological process	0.0058929	2.10352	13	22	3270	AIF1, DHCR24, BTG2, HMGA2, ISG15, DBNDD2, BHLHE41, FAS, GRIN2C, INSIG1, PFKL, HNF1B, LHX3, NUPR1, AMBRA1, BHLHE23, HMX1, ISG20, MVK, PROC, NR1D1, IFIH1
GO:0001706	endoderm formation	0.00596769	19.0489	0	2	29	HNF1B, HMGA2
GO:0048511	rhythmic process	0.00688041	5.7029	1	4	189	EGR2, HLF, NR1D1, BHLHE41
GO:0061351	neural precursor cell proliferation	0.00748346	8.05867	0	3	100	BTG2, HMGA2, OTP
GO:0003002	regionalization	0.00757953	4.41272	1	5	307	EGR2, HNF1B, BTG2, LHX3, ARC
GO:0032480	negative regulation of type I interferon production	0.00909577	15.1197	0	2	36	ISG15, IFIH1
GO:0016925	protein sumoylation	0.00959098	14.6867	0	2	37	IFIH1, EGR2
GO:0048168	regulation of neuronal synaptic plasticity	0.0106166	13.8909	0	2	39	EGR2, ARC
GO:0045595	regulation of cell differentiation	0.0111152	2.55438	4	10	1098	FAS, INSIG1, HNF1B, HMGA2, OTP, DUOXA1, BHLHE23, BHLHE41, SPOCK2, CDH15
GO:0050792	regulation of viral process	0.0117438	6.78877	0	3	118	HMGA2, ISG20, ISG15
GO:0043066	negative regulation of apoptotic process	0.0128007	3.02619	3	7	633	DHCR24, HMGA2, FAS, HNF1B, BTG2, LHX3, PROC
GO:0046546	development of primary male sexual characteristics	0.0128452	6.55875	0	3	122	DHCR24, HMGA2, NUPR1
GO:0006066	alcohol metabolic process	0.0133192	3.81696	1	5	353	MVK, DHCR24, INSIG1, LDLR, APOL1
GO:0043067	regulation of programmed cell death	0.0133479	2.47784	5	10	1129	DHCR24, HMGA2, FAS, HNF1B, BTG2, LHX3, AMBRA1, IFIH1, BHLHE23, PROC
GO:0014706	striated muscle tissue development	0.0134695	3.80575	1	5	354	EGR2, HLF, BTG2, NUPR1, BHLHE41
GO:0030902	hindbrain development	0.0146048	6.24131	1	3	128	EGR2, EN2, HNF1B
GO:0048806	genitalia development	0.015175	11.4151	0	2	47	DHCR24, HNF1B
GO:0046661	male sex differentiation	0.0152203	6.14216	1	3	130	DHCR24, HMGA2, NUPR1
GO:0060537	muscle tissue development	0.0156947	3.65534	1	5	368	EGR2, HLF, BTG2, NUPR1, BHLHE41
GO:0061061	muscle structure development	0.0157838	3.1943	2	6	509	EGR2, HLF, BTG2, NUPR1, BHLHE41, CDH15
GO:0010941	regulation of cell death	0.0164422	2.39187	5	10	1166	DHCR24, HMGA2, FAS, HNF1B, BTG2, LHX3, AMBRA1, IFIH1, BHLHE23, PROC
GO:0043903	regulation of symbiosis, encompassing mutualism through parasitism	0.0168226	5.90744	1	3	135	HMGA2, ISG20, ISG15
GO:0050793	regulation of developmental process	0.0171189	2.20721	6	12	1537	FAS, INSIG1, HNF1B, HMGA2, OTP, NUPR1, DUOXA1, BHLHE23, ARC, BHLHE41, SPOCK2, CDH15
GO:0046165	alcohol biosynthetic process	0.0174891	5.81845	1	3	137	MVK, DHCR24, INSIG1
GO:0007548	sex differentiation	0.0177477	4.2704	1	4	250	DHCR24, HMGA2, NUPR1, HNF1B
GO:0008219	cell death	0.0178479	2.1316	7	13	1735	FAS, DHCR24, HMGA2, APOL1, HNF1B, BTG2, LHX3, NUPR1, AMBRA1, IFIH1, BHLHE23, PROC, PDIA2
GO:0016265	death	0.0180853	2.12739	7	13	1738	FAS, DHCR24, HMGA2, APOL1, HNF1B, BTG2, LHX3, NUPR1, AMBRA1, IFIH1, BHLHE23, PROC, PDIA2
GO:0045444	fat cell differentiation	0.0181702	5.73209	1	3	139	INSIG1, HMGA2, EGR2
GO:0012501	programmed cell death	0.0186223	2.17842	6	12	1555	FAS, DHCR24, HMGA2, HNF1B, BTG2, LHX3, NUPR1, AMBRA1, IFIH1, BHLHE23, PROC, PDIA2
GO:0007517	muscle organ development	0.0187134	3.48759	2	5	385	EGR2, HLF, BTG2, NUPR1, BHLHE41
GO:0048518	positive regulation of biological process	0.0190347	1.84696	14	22	3609	AIF1, INSIG1, HNF1B, BTG2, HMGA2, FAS, EGR2, EN2, BRF1, LHX3, OTP, NUPR1, AMBRA1, DUOXA1, BHLHE23, NR1D1, IFIH1, CNST, LDLR, CDH15, EGR4, WIPI1
GO:0006694	steroid biosynthetic process	0.0192194	5.60719	1	3	142	MVK, DHCR24, INSIG1
GO:0035821	modification of morphology or physiology of other organism	0.0196697	3.44107	2	5	390	HMGA2, APOL1, LDLR, ISG15, IFIH1
GO:2000177	regulation of neural precursor cell proliferation	0.0197333	9.87363	0	2	54	BTG2, OTP
GO:0051239	regulation of multicellular organismal process	0.019866	2.04817	8	14	1954	FAS, EGR2, HNF1B, HMGA2, ARC, OTP, NUPR1, DUOXA1, BHLHE23, ISG15, IFIH1, BHLHE41, PROC, TNNC2
GO:0048523	negative regulation of cellular process	0.0202159	1.88589	12	19	2981	AIF1, DHCR24, BTG2, HMGA2, ISG15, DBNDD2, BHLHE41, FAS, INSIG1, PFKL, HNF1B, LHX3, NUPR1, AMBRA1, BHLHE23, HMX1, ISG20, PROC, NR1D1
GO:0048522	positive regulation of cellular process	0.0210015	1.85714	13	20	3206	AIF1, INSIG1, HNF1B, BTG2, HMGA2, EGR2, EN2, BRF1, LHX3, OTP, NUPR1, AMBRA1, DUOXA1, BHLHE23, FAS, CNST, LDLR, CDH15, EGR4, WIPI1
GO:0048869	cellular developmental process	0.021393	1.87235	12	19	2998	VCAN, HMGA2, FAS, EGR2, EN2, HLF, INSIG1, HNF1B, BTG2, LHX3, OTP, NUPR1, AMBRA1, DUOXA1, BHLHE23, ARC, BHLHE41, SPOCK2, CDH15
GO:0048608	reproductive structure development	0.0214735	4.02072	1	4	265	DHCR24, HMGA2, NUPR1, HNF1B
GO:0008283	cell proliferation	0.0218317	2.12432	6	12	1590	AIF1, HMGA2, DHCR24, HNF1B, BTG2, OTP, NUPR1, AMBRA1, BHLHE41, EGR4, INSIG1, ISG20
GO:2000648	positive regulation of stem cell proliferation	0.0218414	9.33312	0	2	57	HMGA2, OTP
GO:0061458	reproductive system development	0.0220039	3.98958	1	4	267	DHCR24, HMGA2, NUPR1, HNF1B
GO:0021953	central nervous system neuron differentiation	0.022179	5.29907	1	3	150	BTG2, LHX3, OTP
GO:0009615	response to virus	0.0222721	3.97419	1	4	268	ISG20, HMGA2, ISG15, IFIH1
GO:0050789	regulation of biological process	0.0227663	1.82092	33	41	8262	AIF1, DHCR24, INSIG1, HNF1B, BTG2, HMGA2, ISG15, DBNDD2, BHLHE41, CNST, NPB, FAS, EGR2, EN2, GRIN2C, BRF1, PFKL, LHX3, SPOCK2, ARC, OTP, CCNDBP1, NUPR1, MBTD1, AMBRA1, IFIH1, PDIA2, DUOXA1, BHLHE23, HMX1, ISG20, LDLR, MVK, PROC, NR1D1, CDH15, EGR4, TNNC2, LRRN2, WIPI1, ARHGAP33
GO:0006027	glycosaminoglycan catabolic process	0.0232965	9.00439	0	2	59	LYG1, VCAN
GO:0030154	cell differentiation	0.0236811	1.86961	11	18	2817	VCAN, HMGA2, FAS, EGR2, EN2, HLF, INSIG1, HNF1B, BTG2, LHX3, OTP, NUPR1, AMBRA1, DUOXA1, BHLHE23, BHLHE41, SPOCK2, CDH15
GO:0007417	central nervous system development	0.0240503	2.64408	3	7	719	EGR2, EN2, HNF1B, BTG2, LHX3, HMGA2, OTP
GO:0045944	positive regulation of transcription from RNA polymerase II promoter	0.0255306	2.60937	3	7	728	INSIG1, HMGA2, EGR2, EN2, HNF1B, LHX3, BHLHE23
GO:0007611	learning or memory	0.0262101	4.95808	1	3	160	EGR2, BTG2, ARC
GO:0050794	regulation of cellular process	0.0279684	1.75201	31	39	7823	AIF1, DHCR24, INSIG1, HNF1B, BTG2, HMGA2, ISG15, DBNDD2, BHLHE41, CNST, NPB, FAS, EGR2, EN2, BRF1, PFKL, LHX3, SPOCK2, ARC, OTP, CCNDBP1, NUPR1, MBTD1, AMBRA1, IFIH1, PDIA2, DUOXA1, BHLHE23, HMX1, ISG20, PROC, NR1D1, LDLR, CDH15, EGR4, GRIN2C, LRRN2, WIPI1, ARHGAP33
GO:0006022	aminoglycan metabolic process	0.0283637	4.80337	1	3	165	OVGP1, LYG1, VCAN
GO:0051254	positive regulation of RNA metabolic process	0.0287308	2.26101	4	9	1093	INSIG1, HNF1B, BTG2, HMGA2, EGR2, EN2, BRF1, LHX3, BHLHE23
GO:0007389	pattern specification process	0.0287427	3.10081	2	5	431	EGR2, HNF1B, BTG2, LHX3, ARC
GO:0042063	gliogenesis	0.0288054	4.77356	1	3	166	VCAN, EGR2, HMGA2
GO:0044707	single-multicellular organism process	0.029513	1.70141	22	30	5605	VCAN, HNF1B, TNNC2, HMGA2, FAS, DHCR24, EGR2, EN2, GRIN2C, HLF, HMX1, INSIG1, BTG2, LHX3, ARC, OTP, NUPR1, AMBRA1, BHLHE41, DUOXA1, BHLHE23, LDLR, ISG15, IFIH1, SPOCK2, COL10A1, KCNA6, OVGP1, PROC, TCOF1
GO:0043170	macromolecule metabolic process	0.0300669	1.71896	29	37	7340	FKBP11, INSIG1, ISG20, HNF1B, BTG2, HMGA2, ISG15, DBNDD2, IFIH1, BHLHE41, FAS, DHCR24, EGR2, EGR4, EN2, GRIN2C, BRF1, HMX1, OVGP1, TCOF1, LHX3, APOL1, OTP, NUPR1, MBTD1, BHLHE23, LYG1, CPO, DNAJB13, NR1D1, PROC, COL10A1, VCAN, HLF, LDLR, WIPI1, PDIA2
GO:0030900	forebrain development	0.0306076	3.586	1	4	296	BTG2, LHX3, HMGA2, OTP
GO:0042981	regulation of apoptotic process	0.0324431	2.20806	4	9	1117	DHCR24, HMGA2, FAS, HNF1B, BTG2, LHX3, AMBRA1, IFIH1, PROC
GO:0050890	cognition	0.0324713	4.54769	1	3	174	EGR2, BTG2, ARC
GO:1901617	organic hydroxy compound biosynthetic process	0.032946	4.52093	1	3	175	MVK, DHCR24, INSIG1
GO:0044763	single-organism cellular process	0.0331495	1.85321	39	46	9772	WIPI1, AIF1, FAS, VCAN, DHCR24, INSIG1, BTG2, HMGA2, APOL1, NUPR1, NPB, CDH15, EGR2, EN2, GRIN2C, HLF, PFKL, HNF1B, LHX3, SPOCK2, ARC, TTC28, OTP, CCNDBP1, MBTD1, AMBRA1, IFIH1, PDIA2, DUOXA1, BHLHE23, LYG1, PROC, NR1D1, CNST, LDLR, BHLHE41, ISG15, COL10A1, ISG20, KCNA6, OVGP1, TNNC2, LRRN2, COL20A1, SLC13A3, ARHGAP33
GO:1901615	organic hydroxy compound metabolic process	0.0334488	2.97127	2	5	449	MVK, DHCR24, INSIG1, LDLR, APOL1
GO:0071357	cellular response to type I interferon	0.0336733	7.32551	0	2	72	ISG20, ISG15
GO:0021761	limbic system development	0.0336733	7.32551	0	2	72	BTG2, OTP
GO:0060337	type I interferon-mediated signaling pathway	0.0336733	7.32551	0	2	72	ISG20, ISG15
GO:0034340	response to type I interferon	0.0345344	7.22183	0	2	73	ISG15, ISG20
GO:0072091	regulation of stem cell proliferation	0.0371686	6.92761	0	2	76	HMGA2, OTP
GO:0030198	extracellular matrix organization	0.0371893	3.36239	1	4	315	SPOCK2, COL10A1, VCAN, COL20A1
GO:0043062	extracellular structure organization	0.0375568	3.35138	1	4	316	SPOCK2, COL10A1, VCAN, COL20A1
GO:0048193	Golgi vesicle transport	0.0378923	4.26953	1	3	185	WIPI1, INSIG1, CNST
GO:0001708	cell fate specification	0.0398778	6.65631	0	2	79	HNF1B, LHX3
GO:0006915	apoptotic process	0.0400775	1.97299	6	11	1541	FAS, DHCR24, HMGA2, HNF1B, BTG2, LHX3, NUPR1, AMBRA1, IFIH1, PROC, PDIA2
GO:0006892	post-Golgi vesicle-mediated transport	0.0407972	6.57051	0	2	80	WIPI1, CNST
GO:0051607	defense response to virus	0.0410331	4.13153	1	3	191	ISG20, ISG15, IFIH1
GO:0006457	protein folding	0.0421086	4.08746	1	3	193	FKBP11, DNAJB13, PDIA2
GO:0009952	anterior/posterior pattern specification	0.0431983	4.04432	1	3	195	HNF1B, BTG2, ARC
GO:0065007	biological regulation	0.044033	1.69649	35	42	8806	AIF1, DHCR24, INSIG1, HNF1B, BTG2, HMGA2, APOL1, ISG15, DBNDD2, BHLHE41, CNST, NPB, FAS, EGR2, EN2, GRIN2C, BRF1, LDLR, PFKL, LHX3, SPOCK2, ARC, OTP, CCNDBP1, NUPR1, MBTD1, AMBRA1, IFIH1, PDIA2, DUOXA1, BHLHE23, HMX1, ISG20, MVK, PROC, NR1D1, CDH15, EGR4, TNNC2, LRRN2, WIPI1, ARHGAP33
GO:0031325	positive regulation of cellular metabolic process	0.0446571	1.84313	8	13	1968	INSIG1, HNF1B, BTG2, HMGA2, EGR2, EN2, BRF1, LHX3, NUPR1, DUOXA1, BHLHE23, LDLR, WIPI1
GO:0001704	formation of primary germ layer	0.0455128	6.17255	0	2	85	HNF1B, HMGA2
GO:0022008	neurogenesis	0.0457932	2.06022	5	9	1190	VCAN, EGR2, EN2, BTG2, LHX3, HMGA2, OTP, DUOXA1, BHLHE23
GO:0030072	peptide hormone secretion	0.0459844	3.94029	1	3	200	PFKL, HNF1B, HMGA2
GO:0007399	nervous system development	0.0461025	1.87403	7	12	1775	VCAN, EGR2, EN2, HNF1B, BTG2, LHX3, HMGA2, OTP, AMBRA1, DUOXA1, BHLHE23, SPOCK2
GO:0032501	multicellular organismal process	0.0466191	1.60956	23	30	5796	VCAN, HNF1B, TNNC2, HMGA2, FAS, DHCR24, EGR2, EN2, GRIN2C, HLF, HMX1, INSIG1, BTG2, LHX3, ARC, OTP, NUPR1, AMBRA1, BHLHE41, DUOXA1, BHLHE23, LDLR, ISG15, IFIH1, SPOCK2, COL10A1, KCNA6, OVGP1, PROC, TCOF1
GO:0002790	peptide secretion	0.0482764	3.86079	1	3	204	PFKL, HNF1B, HMGA2
GO:0043254	regulation of protein complex assembly	0.0488581	3.8414	1	3	205	HNF1B, FAS, INSIG1
GO:0007623	circadian rhythm	0.0494232	5.88711	0	2	89	NR1D1, BHLHE41

## Sheet: GOBP_down
GOBPID	Term	Pvalue	OddsRatio	ExpCount	Count	Size	Genes
GO:0035914	skeletal muscle cell differentiation	0.000109597	18.5106	0	4	98	EGR2, HLF, BTG2, BHLHE41
GO:0006026	aminoglycan catabolic process	0.000628322	20.1485	0	3	66	OVGP1, LYG1, VCAN
GO:0009303	rRNA transcription	0.00117166	45.8127	0	2	20	TCOF1, BRF1
GO:0048511	rhythmic process	0.00132401	9.34578	0	4	189	EGR2, HLF, NR1D1, BHLHE41
GO:0007519	skeletal muscle tissue development	0.00234636	7.94973	1	4	221	EGR2, HLF, BTG2, BHLHE41
GO:0060538	skeletal muscle organ development	0.00262671	7.69751	1	4	228	EGR2, HLF, BTG2, BHLHE41
GO:0032480	negative regulation of type I interferon production	0.00378643	24.2269	0	2	36	ISG15, IFIH1
GO:0045071	negative regulation of viral genome replication	0.00399639	23.5331	0	2	37	ISG20, ISG15
GO:0016925	protein sumoylation	0.00399639	23.5331	0	2	37	IFIH1, EGR2
GO:0048168	regulation of neuronal synaptic plasticity	0.00443219	22.2579	0	2	39	EGR2, ARC
GO:0051146	striated muscle cell differentiation	0.004744	6.48782	1	4	269	EGR2, HLF, BTG2, BHLHE41
GO:0048525	negative regulation of viral process	0.00665039	17.8919	0	2	48	ISG20, ISG15
GO:0003002	regionalization	0.00753361	5.65897	1	4	307	EGR2, HNF1B, BTG2, ARC
GO:0009057	macromolecule catabolic process	0.00770575	3.47154	2	7	917	ISG20, BTG2, GRIN2C, OVGP1, ISG15, LYG1, VCAN
GO:0007611	learning or memory	0.00780375	8.03222	0	3	160	EGR2, BTG2, ARC
GO:0007492	endoderm development	0.00805957	16.1322	0	2	53	HNF1B, ARC
GO:0030198	extracellular matrix organization	0.00823417	5.51028	1	4	315	SPOCK2, COL10A1, VCAN, COL20A1
GO:0043062	extracellular structure organization	0.00832466	5.49223	1	4	316	SPOCK2, COL10A1, VCAN, COL20A1
GO:0045069	regulation of viral genome replication	0.00835617	15.8209	0	2	54	ISG20, ISG15
GO:2000177	regulation of neural precursor cell proliferation	0.00835617	15.8209	0	2	54	BTG2, OTP
GO:0006022	aminoglycan metabolic process	0.00848906	7.78159	0	3	165	OVGP1, LYG1, VCAN
GO:0050890	cognition	0.00980976	7.36739	0	3	174	EGR2, BTG2, ARC
GO:0006027	glycosaminoglycan catabolic process	0.00991165	14.4281	0	2	59	LYG1, VCAN
GO:0042692	muscle cell differentiation	0.0110214	5.04514	1	4	343	EGR2, HLF, BTG2, BHLHE41
GO:0014706	striated muscle tissue development	0.0122652	4.88277	1	4	354	EGR2, HLF, BTG2, BHLHE41
GO:0051607	defense response to virus	0.0126163	6.69321	0	3	191	ISG20, ISG15, IFIH1
GO:0019079	viral genome replication	0.0130079	12.4528	0	2	68	ISG20, ISG15
GO:0009952	anterior/posterior pattern specification	0.013337	6.55193	0	3	195	HNF1B, BTG2, ARC
GO:0060537	muscle tissue development	0.0139749	4.69031	1	4	368	EGR2, HLF, BTG2, BHLHE41
GO:0071357	cellular response to type I interferon	0.0145025	11.738	0	2	72	ISG20, ISG15
GO:0021761	limbic system development	0.0145025	11.738	0	2	72	BTG2, OTP
GO:0060337	type I interferon-mediated signaling pathway	0.0145025	11.738	0	2	72	ISG20, ISG15
GO:0043901	negative regulation of multi-organism process	0.0148872	11.5718	0	2	73	ISG20, ISG15
GO:0034340	response to type I interferon	0.0148872	11.5718	0	2	73	ISG15, ISG20
GO:0007517	muscle organ development	0.0162474	4.47562	1	4	385	EGR2, HLF, BTG2, BHLHE41
GO:0006352	DNA-dependent transcription, initiation	0.0194882	5.65461	1	3	225	HNF1B, BRF1, NR1D1
GO:0051239	regulation of multicellular organismal process	0.02158	2.38245	5	10	1954	FAS, EGR2, HNF1B, ARC, OTP, ISG15, IFIH1, BHLHE41, PROC, TNNC2
GO:0007623	circadian rhythm	0.0216254	9.43317	0	2	89	NR1D1, BHLHE41
GO:0007389	pattern specification process	0.0235258	3.98041	1	4	431	EGR2, HNF1B, BTG2, ARC
GO:0007612	learning	0.024423	8.82089	0	2	95	BTG2, ARC
GO:0048167	regulation of synaptic plasticity	0.0249031	8.72644	0	2	96	EGR2, ARC
GO:0061351	neural precursor cell proliferation	0.0268617	8.36793	0	2	100	BTG2, OTP
GO:0031334	positive regulation of protein complex assembly	0.028881	8.03754	0	2	104	HNF1B, FAS
GO:0008037	cell recognition	0.028881	8.03754	0	2	104	VCAN, OVGP1
GO:0032479	regulation of type I interferon production	0.0293951	7.95895	0	2	105	IFIH1, ISG15
GO:0032606	type I interferon production	0.0304343	7.80626	0	2	107	IFIH1, ISG15
GO:0009615	response to virus	0.0306356	4.72275	1	3	268	ISG20, ISG15, IFIH1
GO:0009056	catabolic process	0.0334095	2.19629	5	10	2095	ISG20, BTG2, GRIN2C, OVGP1, ISG15, AMBRA1, ALLC, LYG1, COL10A1, VCAN
GO:0050792	regulation of viral process	0.0364059	7.06059	0	2	118	ISG20, ISG15
GO:0061061	muscle structure development	0.0398563	3.34689	1	4	509	EGR2, HLF, BTG2, BHLHE41
GO:0051248	negative regulation of protein metabolic process	0.0413272	3.30617	1	4	515	BTG2, ISG15, DBNDD2, GRIN2C
GO:0044707	single-multicellular organism process	0.0414032	1.86719	14	20	5605	VCAN, HNF1B, TNNC2, FAS, EGR2, GRIN2C, HLF, BTG2, ARC, OTP, AMBRA1, BHLHE41, ISG15, IFIH1, SPOCK2, COL10A1, KCNA6, OVGP1, PROC, TCOF1
GO:0030902	hindbrain development	0.0421937	6.49569	0	2	128	EGR2, HNF1B
GO:0035270	endocrine system development	0.0439937	6.3433	0	2	131	OTP, HNF1B
GO:0008283	cell proliferation	0.0441921	2.24369	4	8	1590	AIF1, HNF1B, BTG2, OTP, AMBRA1, BHLHE41, EGR4, ISG20
GO:0007420	brain development	0.0454012	3.20212	1	4	531	EGR2, HNF1B, BTG2, OTP
GO:0002252	immune effector process	0.045926	3.18955	1	4	533	FAS, ISG20, ISG15, IFIH1
GO:0043903	regulation of symbiosis, encompassing mutualism through parasitism	0.0464377	6.15081	0	2	135	ISG20, ISG15
GO:0007610	behavior	0.047253	3.15855	1	4	538	AIF1, EGR2, BTG2, ARC

## Sheet: GOBP_up
	Term	Pvalue	OddsRatio	ExpCount	Count	Size	Genes
GO:0008203	cholesterol metabolic process	6.03865e-07	39.6903	0	5	118	MVK, DHCR24, INSIG1, LDLR, APOL1
GO:0016125	sterol metabolic process	1.01487e-06	35.563	0	5	131	MVK, DHCR24, INSIG1, LDLR, APOL1
GO:0008202	steroid metabolic process	3.33286e-05	16.875	0	5	268	MVK, DHCR24, INSIG1, LDLR, APOL1
GO:0006695	cholesterol biosynthetic process	3.34706e-05	58.6341	0	3	44	MVK, DHCR24, INSIG1
GO:0016126	sterol biosynthetic process	4.92574e-05	51.1277	0	3	50	MVK, DHCR24, INSIG1
GO:0006066	alcohol metabolic process	0.000123203	12.6769	1	5	353	MVK, DHCR24, INSIG1, LDLR, APOL1
GO:1901615	organic hydroxy compound metabolic process	0.000377351	9.86838	1	5	449	MVK, DHCR24, INSIG1, LDLR, APOL1
GO:0065007	biological regulation	0.00041688	12.9274	13	20	8806	DHCR24, INSIG1, HMGA2, APOL1, NPB, EN2, LDLR, PFKL, LHX3, CCNDBP1, NUPR1, MBTD1, PDIA2, DUOXA1, BHLHE23, HMX1, MVK, CDH15, WIPI1, ARHGAP33
GO:0046546	development of primary male sexual characteristics	0.000693824	20.0924	0	3	122	DHCR24, HMGA2, NUPR1
GO:0046661	male sex differentiation	0.000834506	18.8163	0	3	130	DHCR24, HMGA2, NUPR1
GO:0046165	alcohol biosynthetic process	0.000971511	17.8246	0	3	137	MVK, DHCR24, INSIG1
GO:0031325	positive regulation of cellular metabolic process	0.000972699	4.7879	3	9	1968	INSIG1, HMGA2, EN2, LHX3, NUPR1, DUOXA1, BHLHE23, LDLR, WIPI1
GO:0050789	regulation of biological process	0.00102213	7.17081	12	19	8262	DHCR24, INSIG1, HMGA2, NPB, EN2, PFKL, LHX3, CCNDBP1, NUPR1, MBTD1, PDIA2, DUOXA1, BHLHE23, HMX1, LDLR, MVK, CDH15, WIPI1, ARHGAP33
GO:0006694	steroid biosynthetic process	0.00107762	17.1775	0	3	142	MVK, DHCR24, INSIG1
GO:0009893	positive regulation of metabolic process	0.00143379	4.50109	3	9	2075	INSIG1, HMGA2, EN2, LHX3, NUPR1, DUOXA1, BHLHE23, LDLR, WIPI1
GO:0021983	pituitary gland development	0.00174385	37.0321	0	2	43	LHX3, HMGA2
GO:1901617	organic hydroxy compound biosynthetic process	0.00196389	13.8498	0	3	175	MVK, DHCR24, INSIG1
GO:0050794	regulation of cellular process	0.00237298	5.1198	11	18	7823	DHCR24, INSIG1, HMGA2, NPB, EN2, PFKL, LHX3, CCNDBP1, NUPR1, MBTD1, PDIA2, DUOXA1, BHLHE23, HMX1, LDLR, CDH15, WIPI1, ARHGAP33
GO:0045944	positive regulation of transcription from RNA polymerase II promoter	0.00328303	5.93966	1	5	728	INSIG1, HMGA2, EN2, LHX3, BHLHE23
GO:0045137	development of primary sexual characteristics	0.00375505	10.9432	0	3	220	DHCR24, HMGA2, NUPR1
GO:0021536	diencephalon development	0.00455525	22.2864	0	2	70	LHX3, HMGA2
GO:0007548	sex differentiation	0.00536736	9.59379	0	3	250	DHCR24, HMGA2, NUPR1
GO:0048608	reproductive structure development	0.00630835	9.03499	0	3	265	DHCR24, HMGA2, NUPR1
GO:0061458	reproductive system development	0.00644082	8.96528	0	3	267	DHCR24, HMGA2, NUPR1
GO:0008610	lipid biosynthetic process	0.00802465	5.84244	1	4	564	MVK, DHCR24, INSIG1, LDLR
GO:0006984	ER-nucleus signaling pathway	0.00857824	15.9224	0	2	97	INSIG1, WIPI1
GO:0048522	positive regulation of cellular process	0.0086322	3.20543	5	10	3206	INSIG1, HMGA2, EN2, LHX3, NUPR1, DUOXA1, BHLHE23, LDLR, CDH15, WIPI1
GO:0031328	positive regulation of cellular biosynthetic process	0.00881297	4.05077	2	6	1306	INSIG1, HMGA2, EN2, LHX3, BHLHE23, LDLR
GO:0008219	cell death	0.00886545	3.68547	3	7	1735	DHCR24, HMGA2, APOL1, LHX3, NUPR1, BHLHE23, PDIA2
GO:0016265	death	0.00894885	3.67822	3	7	1738	DHCR24, HMGA2, APOL1, LHX3, NUPR1, BHLHE23, PDIA2
GO:0046890	regulation of lipid biosynthetic process	0.00944905	15.1211	0	2	102	INSIG1, LDLR
GO:0009891	positive regulation of biosynthetic process	0.00957993	3.97339	2	6	1329	INSIG1, HMGA2, EN2, LHX3, BHLHE23, LDLR
GO:0008584	male gonad development	0.00980803	14.8225	0	2	104	HMGA2, NUPR1
GO:0006720	isoprenoid metabolic process	0.00980803	14.8225	0	2	104	MVK, LDLR
GO:0006641	triglyceride metabolic process	0.00980803	14.8225	0	2	104	INSIG1, LDLR
GO:0042157	lipoprotein metabolic process	0.00998978	14.6776	0	2	105	APOL1, LDLR
GO:0045786	negative regulation of cell cycle	0.0105748	7.43849	0	3	320	HMGA2, NUPR1, DHCR24
GO:0006639	acylglycerol metabolic process	0.0107318	14.1249	0	2	109	INSIG1, LDLR
GO:0006638	neutral lipid metabolic process	0.0109211	13.9932	0	2	110	INSIG1, LDLR
GO:0034976	response to endoplasmic reticulum stress	0.0120875	13.2512	0	2	116	PDIA2, WIPI1
GO:0043069	negative regulation of programmed cell death	0.0123967	5.11617	1	4	640	DHCR24, HMGA2, LHX3, BHLHE23
GO:0060548	negative regulation of cell death	0.014333	4.8905	1	4	668	DHCR24, HMGA2, LHX3, BHLHE23
GO:0045893	positive regulation of transcription, DNA-dependent	0.0144368	4.06765	2	5	1037	INSIG1, HMGA2, EN2, LHX3, BHLHE23
GO:0035270	endocrine system development	0.0152313	11.6981	0	2	131	LHX3, HMGA2
GO:0010604	positive regulation of macromolecule metabolic process	0.015466	3.26889	3	7	1926	INSIG1, HMGA2, EN2, LHX3, NUPR1, BHLHE23, WIPI1
GO:0051171	regulation of nitrogen compound metabolic process	0.0167993	2.83948	5	10	3518	INSIG1, HMGA2, EN2, LHX3, NUPR1, MBTD1, BHLHE23, HMX1, LDLR, WIPI1
GO:0045444	fat cell differentiation	0.0170373	11.0088	0	2	139	INSIG1, HMGA2
GO:0051254	positive regulation of RNA metabolic process	0.0178159	3.8422	2	5	1093	INSIG1, HMGA2, EN2, LHX3, BHLHE23
GO:0035821	modification of morphology or physiology of other organism	0.0179685	6.06288	1	3	390	HMGA2, APOL1, LDLR
GO:0045595	regulation of cell differentiation	0.0181415	3.82319	2	5	1098	INSIG1, HMGA2, DUOXA1, BHLHE23, CDH15
GO:0050793	regulation of developmental process	0.0188861	3.37923	2	6	1537	INSIG1, HMGA2, NUPR1, DUOXA1, BHLHE23, CDH15
GO:0048699	generation of neurons	0.0196915	3.73796	2	5	1121	EN2, LHX3, HMGA2, DUOXA1, BHLHE23
GO:0051726	regulation of cell cycle	0.0197308	4.4207	1	4	735	HMGA2, CCNDBP1, NUPR1, DHCR24
GO:0010628	positive regulation of gene expression	0.0198304	3.73071	2	5	1123	INSIG1, HMGA2, EN2, LHX3, BHLHE23
GO:0012501	programmed cell death	0.0199143	3.33531	2	6	1555	DHCR24, HMGA2, LHX3, NUPR1, BHLHE23, PDIA2
GO:0048518	positive regulation of biological process	0.0200664	2.7447	5	10	3609	INSIG1, HMGA2, EN2, LHX3, NUPR1, DUOXA1, BHLHE23, LDLR, CDH15, WIPI1
GO:0003006	developmental process involved in reproduction	0.0230822	5.49257	1	3	429	DHCR24, HMGA2, NUPR1
GO:0006629	lipid metabolic process	0.0231319	3.57427	2	5	1168	MVK, DHCR24, INSIG1, LDLR, APOL1
GO:0048839	inner ear development	0.0234988	9.23603	0	2	165	INSIG1, LHX3
GO:0090276	regulation of peptide hormone secretion	0.0237648	9.17908	0	2	166	PFKL, HMGA2
GO:0002791	regulation of peptide secretion	0.0243005	9.06722	0	2	168	PFKL, HMGA2
GO:0019222	regulation of metabolic process	0.0243809	2.60031	7	12	4915	DHCR24, INSIG1, HMGA2, EN2, LHX3, NUPR1, MBTD1, DUOXA1, BHLHE23, HMX1, LDLR, WIPI1
GO:0090087	regulation of peptide transport	0.0248412	8.95802	0	2	170	PFKL, HMGA2
GO:0022008	neurogenesis	0.0248719	3.50211	2	5	1190	EN2, LHX3, HMGA2, DUOXA1, BHLHE23
GO:1901360	organic cyclic compound metabolic process	0.0252394	2.60035	8	13	5576	INSIG1, MVK, HMGA2, DHCR24, EN2, HMX1, LDLR, LHX3, APOL1, NUPR1, MBTD1, BHLHE23, WIPI1
GO:0044283	small molecule biosynthetic process	0.0252414	5.30008	1	3	444	MVK, DHCR24, INSIG1
GO:1901362	organic cyclic compound biosynthetic process	0.0257028	2.61449	5	10	3742	INSIG1, MVK, HMGA2, DHCR24, EN2, HMX1, LHX3, NUPR1, MBTD1, BHLHE23
GO:0007423	sensory organ development	0.0270461	5.15526	1	3	456	INSIG1, BHLHE23, LHX3
GO:0044711	single-organism biosynthetic process	0.0271996	5.14354	1	3	457	MVK, DHCR24, INSIG1
GO:0045935	positive regulation of nucleobase-containing compound metabolic process	0.0272953	3.41099	2	5	1219	INSIG1, HMGA2, EN2, LHX3, BHLHE23
GO:0010557	positive regulation of macromolecule biosynthetic process	0.0275545	3.40181	2	5	1222	INSIG1, HMGA2, EN2, LHX3, BHLHE23
GO:0022607	cellular component assembly	0.0277216	3.06882	2	6	1674	WIPI1, PFKL, HMGA2, NUPR1, INSIG1, CDH15
GO:0048193	Golgi vesicle transport	0.0290528	8.21513	0	2	185	WIPI1, INSIG1
GO:0051173	positive regulation of nitrogen compound metabolic process	0.0295052	3.33586	2	5	1244	INSIG1, HMGA2, EN2, LHX3, BHLHE23
GO:0008406	gonad development	0.0302215	8.03715	0	2	189	HMGA2, NUPR1
GO:0048519	negative regulation of biological process	0.0306852	2.57682	5	9	3270	DHCR24, HMGA2, INSIG1, PFKL, LHX3, NUPR1, BHLHE23, HMX1, MVK
GO:0033554	cellular response to stress	0.0313552	3.2779	2	5	1264	WIPI1, INSIG1, HMGA2, NUPR1, PDIA2
GO:0043583	ear development	0.0314089	7.86663	0	2	193	INSIG1, LHX3
GO:0006457	protein folding	0.0314089	7.86663	0	2	193	FKBP11, PDIA2
GO:0031323	regulation of cellular metabolic process	0.0316332	2.47883	6	11	4457	INSIG1, HMGA2, EN2, LHX3, NUPR1, MBTD1, DUOXA1, BHLHE23, HMX1, LDLR, WIPI1
GO:0046883	regulation of hormone secretion	0.0335312	7.5848	0	2	200	PFKL, HMGA2
GO:0030072	peptide hormone secretion	0.0335312	7.5848	0	2	200	PFKL, HMGA2
GO:0006357	regulation of transcription from RNA polymerase II promoter	0.0346701	3.18349	2	5	1298	INSIG1, HMGA2, EN2, LHX3, BHLHE23
GO:0002790	peptide secretion	0.0347689	7.43252	0	2	204	PFKL, HMGA2
GO:0006869	lipid transport	0.0363411	7.25044	0	2	209	APOL1, LDLR
GO:0031326	regulation of cellular biosynthetic process	0.0364686	2.48264	5	9	3365	INSIG1, HMGA2, EN2, LHX3, NUPR1, MBTD1, BHLHE23, HMX1, LDLR
GO:0030154	cell differentiation	0.0369239	2.55355	4	8	2817	HMGA2, EN2, INSIG1, LHX3, NUPR1, DUOXA1, BHLHE23, CDH15
GO:0019216	regulation of lipid metabolic process	0.038264	7.04324	0	2	215	INSIG1, LDLR
GO:0009889	regulation of biosynthetic process	0.0384505	2.454	5	9	3395	INSIG1, HMGA2, EN2, LHX3, NUPR1, MBTD1, BHLHE23, HMX1, LDLR
GO:0015833	peptide transport	0.0389137	6.97674	0	2	217	PFKL, HMGA2
GO:0007050	cell cycle arrest	0.0389137	6.97674	0	2	217	HMGA2, DHCR24
GO:0044085	cellular component biogenesis	0.0393338	2.80022	3	6	1814	WIPI1, PFKL, HMGA2, NUPR1, INSIG1, CDH15
GO:0007420	brain development	0.0398767	4.39931	1	3	531	EN2, LHX3, HMGA2
GO:0019219	regulation of nucleobase-containing compound metabolic process	0.0410723	2.41844	5	9	3433	INSIG1, HMGA2, EN2, LHX3, NUPR1, MBTD1, BHLHE23, HMX1, WIPI1
GO:0060284	regulation of cell development	0.0412098	4.33956	1	3	538	HMGA2, DUOXA1, BHLHE23
GO:0042886	amide transport	0.0412209	6.75344	0	2	224	PFKL, HMGA2
GO:0006355	regulation of transcription, DNA-dependent	0.0416679	2.48296	4	8	2881	INSIG1, HMGA2, EN2, LHX3, NUPR1, MBTD1, BHLHE23, HMX1
GO:2001141	regulation of RNA biosynthetic process	0.0431555	2.4626	4	8	2900	INSIG1, HMGA2, EN2, LHX3, NUPR1, MBTD1, BHLHE23, HMX1
GO:0046879	hormone secretion	0.0466854	6.29235	0	2	240	PFKL, HMGA2
GO:0010876	lipid localization	0.0473867	6.23904	0	2	242	APOL1, LDLR
GO:0051252	regulation of RNA metabolic process	0.0486134	2.39393	4	8	2966	INSIG1, HMGA2, EN2, LHX3, NUPR1, MBTD1, BHLHE23, HMX1
GO:0009914	hormone transport	0.0488009	6.13503	0	2	246	PFKL, HMGA2
GO:0048523	negative regulation of cellular process	0.0499178	2.37874	4	8	2981	DHCR24, HMGA2, INSIG1, PFKL, LHX3, NUPR1, BHLHE23, HMX1

## Sheet: GOMF_all
GOMFID	Term	Pvalue	OddsRatio	ExpCount	Count	Size	Genes
GO:0003700	sequence-specific DNA binding transcription factor activity	0.000642926	3.42882	4	12	1001	EGR2, HNF1B, HMGA2, EN2, HLF, HMX1, BTG2, LHX3, OTP, BHLHE41, EGR4, NR1D1
GO:0001071	nucleic acid binding transcription factor activity	0.000654445	3.4214	4	12	1003	EGR2, HNF1B, HMGA2, EN2, HLF, HMX1, BTG2, LHX3, OTP, BHLHE41, EGR4, NR1D1
GO:0043565	sequence-specific DNA binding	0.00153766	3.70573	3	9	671	HMGA2, EN2, HLF, HMX1, HNF1B, LHX3, NR1D1, OTP, BHLHE41
GO:0044212	transcription regulatory region DNA binding	0.00319003	4.54169	1	6	354	HMGA2, NR1D1, BHLHE41, HNF1B, OTP, EGR2
GO:0000975	regulatory region DNA binding	0.00351236	4.44999	1	6	361	HMGA2, NR1D1, BHLHE41, HNF1B, OTP, EGR2
GO:0001067	regulatory region nucleic acid binding	0.00351236	4.44999	1	6	361	HMGA2, NR1D1, BHLHE41, HNF1B, OTP, EGR2
GO:0005509	calcium ion binding	0.00507847	3.30491	3	8	656	SPOCK2, CDH15, VCAN, LDLR, PROC, TNNC2, CRELD2, AIF1
GO:0000981	sequence-specific DNA binding RNA polymerase II transcription factor activity	0.00588191	4.69282	1	5	282	HMGA2, HNF1B, BTG2, BHLHE41, NR1D1
GO:0001078	RNA polymerase II core promoter proximal region sequence-specific DNA binding transcription factor activity involved in negative regulation of transcription	0.00755936	16.7299	0	2	32	HMGA2, BHLHE41
GO:0001227	RNA polymerase II transcription regulatory region sequence-specific DNA binding transcription factor activity involved in negative regulation of transcription	0.0085053	15.6822	0	2	34	HMGA2, BHLHE41
GO:0000982	RNA polymerase II core promoter proximal region sequence-specific DNA binding transcription factor activity	0.00864235	7.62207	0	3	103	HMGA2, BTG2, BHLHE41
GO:0001102	RNA polymerase II activating transcription factor binding	0.00899716	15.206	0	2	35	EGR2, BHLHE41
GO:0033613	activating transcription factor binding	0.0191796	10.0244	0	2	52	EGR2, BHLHE41
GO:0001077	RNA polymerase II core promoter proximal region sequence-specific DNA binding transcription factor activity involved in positive regulation of transcription	0.0359934	7.04942	0	2	73	HMGA2, BTG2
GO:0001085	RNA polymerase II transcription factor binding	0.039662	6.67164	0	2	77	EGR2, BHLHE41
GO:0003677	DNA binding	0.0407873	1.79577	9	15	2295	HNF1B, HMGA2, NR1D1, BHLHE41, EGR4, EN2, HLF, HMX1, LHX3, OTP, NUPR1, IFIH1, BHLHE23, STOX1, EGR2
GO:0001228	RNA polymerase II transcription regulatory region sequence-specific DNA binding transcription factor activity involved in positive regulation of transcription	0.0425029	6.41373	0	2	80	HMGA2, BTG2
GO:0004553	hydrolase activity, hydrolyzing O-glycosyl compounds	0.0474014	6.02532	0	2	85	OVGP1, LYG1

## Sheet: GOMF_up
GOMFID	Term	Pvalue	OddsRatio	ExpCount	Count	Size	Genes
GO:0005488	binding	0.00226114	Inf	20	25	11678	FKBP11, PFKL, HMGA2, APOL1, WIPI1, CDH15, DHCR24, EN2, HMX1, LDLR, MVK, LHX3, NUPR1, MBTD1, PDIA2, CRELD2, ARHGAP33, RAVER1, BHLHE23, STOX1, NPB, CISD3, INSIG1, MON1B, CCNDBP1
GO:0016853	isomerase activity	0.0231458	9.21677	0	2	141	FKBP11, PDIA2
GO:0043565	sequence-specific DNA binding	0.0242907	4.05654	1	4	671	HMGA2, EN2, HMX1, LHX3
GO:0035091	phosphatidylinositol binding	0.028587	8.2029	0	2	158	WIPI1, ARHGAP33
GO:0008289	lipid binding	0.0310299	3.74392	1	4	724	APOL1, WIPI1, PDIA2, ARHGAP33

## Sheet: GOMF_down
GOMFID	Term	Pvalue	OddsRatio	ExpCount	Count	Size	Genes
GO:0044212	transcription regulatory region DNA binding	0.00151513	6.70672	1	5	354	NR1D1, BHLHE41, HNF1B, OTP, EGR2
GO:0000975	regulatory region DNA binding	0.00165168	6.57167	1	5	361	NR1D1, BHLHE41, HNF1B, OTP, EGR2
GO:0001067	regulatory region nucleic acid binding	0.00165168	6.57167	1	5	361	NR1D1, BHLHE41, HNF1B, OTP, EGR2
GO:0003700	sequence-specific DNA binding transcription factor activity	0.00225604	3.99022	2	8	1001	EGR2, HNF1B, HLF, BTG2, OTP, BHLHE41, EGR4, NR1D1
GO:0001071	nucleic acid binding transcription factor activity	0.00228455	3.98162	2	8	1003	EGR2, HNF1B, HLF, BTG2, OTP, BHLHE41, EGR4, NR1D1
GO:0001102	RNA polymerase II activating transcription factor binding	0.00321323	26.4314	0	2	35	EGR2, BHLHE41
GO:0000981	sequence-specific DNA binding RNA polymerase II transcription factor activity	0.00459733	6.5571	1	4	282	HNF1B, BTG2, BHLHE41, NR1D1
GO:0033613	activating transcription factor binding	0.00697896	17.4247	0	2	52	EGR2, BHLHE41
GO:0001085	RNA polymerase II transcription factor binding	0.0148297	11.5969	0	2	77	EGR2, BHLHE41
GO:0004553	hydrolase activity, hydrolyzing O-glycosyl compounds	0.0178771	10.4734	0	2	85	OVGP1, LYG1
GO:0005509	calcium ion binding	0.0198547	3.52064	2	5	656	SPOCK2, VCAN, PROC, TNNC2, AIF1
GO:0043565	sequence-specific DNA binding	0.0216675	3.43771	2	5	671	HLF, HNF1B, NR1D1, OTP, BHLHE41
GO:0000982	RNA polymerase II core promoter proximal region sequence-specific DNA binding transcription factor activity	0.0256028	8.59639	0	2	103	BTG2, BHLHE41
GO:0003705	RNA polymerase II distal enhancer sequence-specific DNA binding transcription factor activity	0.0260657	8.51153	0	2	104	HNF1B, BHLHE41
GO:0016798	hydrolase activity, acting on glycosyl bonds	0.0294005	7.96114	0	2	111	OVGP1, LYG1

## Sheet: GOCC_all
GOCCID	Term	Pvalue	OddsRatio	ExpCount	Count	Size	Genes
GO:0005788	endoplasmic reticulum lumen	0.00456346	6.41537	1	4	179	PDIA2, COL10A1, PROC, COL20A1
GO:0034358	plasma lipoprotein particle	0.0084862	15.6371	0	2	37	APOL1, LDLR
GO:0005776	autophagic vacuole	0.00893615	15.2019	0	2	38	WIPI1, AMBRA1
GO:0032994	protein-lipid complex	0.00893615	15.2019	0	2	38	APOL1, LDLR
GO:0005576	extracellular region	0.0216405	2.01005	8	14	2099	VCAN, APOL1, ISG15, FAS, COL10A1, LDLR, COL20A1, LYNX1, CRELD2, LYG1, CPO, PROC, SPOCK2, NPB
GO:0005796	Golgi lumen	0.0397031	6.65528	0	2	84	VCAN, PROC
GO:0005581	collagen	0.0431867	6.34419	0	2	88	COL10A1, COL20A1
GO:0005578	proteinaceous extracellular matrix	0.0461353	3.11856	1	4	360	COL10A1, VCAN, COL20A1, SPOCK2

## Sheet: GOCC_down
GOCCID	Term	Pvalue	OddsRatio	ExpCount	Count	Size	Genes
GO:0005788	endoplasmic reticulum lumen	0.00687399	8.42149	0	3	179	COL10A1, PROC, COL20A1
GO:0005578	proteinaceous extracellular matrix	0.00754276	5.66152	1	4	360	COL10A1, VCAN, COL20A1, SPOCK2
GO:0031012	extracellular matrix	0.0125681	4.85085	1	4	418	VCAN, COL10A1, COL20A1, SPOCK2
GO:0005796	Golgi lumen	0.0143965	11.7633	0	2	84	VCAN, PROC
GO:0005581	collagen	0.0157232	11.2134	0	2	88	COL10A1, COL20A1
GO:0014069	postsynaptic density	0.0196298	9.93511	0	2	99	GRIN2C, ARC
GO:0005576	extracellular region	0.0326998	2.29506	5	9	2099	VCAN, ISG15, FAS, COL10A1, COL20A1, LYG1, CPO, PROC, SPOCK2
GO:0030133	transport vesicle	0.0392039	6.76802	0	2	144	CNST, OVGP1
GO:0015629	actin cytoskeleton	0.0474373	3.94732	1	3	374	AIF1, TNNC2, ARC

[truncated: 2 more sheets: GOCC_up, Hoja1]
